# Supplementary material
Source: PubMed Central journal article supplement (PMC6364840)

# Supporting information

|                                                                                                                                                                                        |    |
|----------------------------------------------------------------------------------------------------------------------------------------------------------------------------------------|----|
| Supporting information .....                                                                                                                                                           | 1  |
| Experimental Section .....                                                                                                                                                             | 1  |
| Chemical Synthesis .....                                                                                                                                                               | 1  |
| General procedure for the preparation of 3-amino-1,2,4-triazole derivatives ( <b>3</b> ) .....                                                                                         | 1  |
| General procedure for the synthesis of 2-chloro-N-(1H-1,2,4-triazol-5-yl)acetamide derivatives ( <b>4</b> ) .....                                                                      | 1  |
| General procedure for the synthesis of N-(1,3-disubstituted-1H-1,2,4-triazol-5-yl)-2-phenoxyacetamides ( <b>5</b> ) .....                                                              | 2  |
| General procedure for the synthesis of 1,3-disubstituted-N-(2-phenoxyethyl)-1H-1,2,4-triazol-5-amines ( <b>6</b> ) .....                                                               | 2  |
| General procedure for synthesis of 4-triazolyl-1-oxa-4-azaspiro[4,5]deca-6,9-dien-3,8-diones ( <b>1</b> ) and 4-triazolyl-1-oxa-4-azaspiro[4,5]deca-6,9-dien-8-ones ( <b>2</b> ) ..... | 2  |
| <sup>1</sup> H-NMR (CDCl <sub>3</sub> ), <sup>13</sup> C-NMR (CDCl <sub>3</sub> ) and HR-MS data of compounds .....                                                                    | 2  |
| Cell Proliferation Assay .....                                                                                                                                                         | 4  |
| Cell Apoptosis Assay .....                                                                                                                                                             | 4  |
| <sup>1</sup> H-NMR (CDCl <sub>3</sub> ) and <sup>13</sup> C-NMR (CDCl <sub>3</sub> ) of compounds .....                                                                                | 6  |
| HPLC Purity Data for Compounds .....                                                                                                                                                   | 40 |

## Experimental Section

**Chemical Synthesis.** Silica gel F<sub>254</sub> plates were used for thin layer chromatography (TLC) in which the spots were examined under UV light at 254 nm and then developed by an iodine vapor. Flash chromatography was performed on silica gel H. Anhydrous solvents were purified according to standard procedures. All other commercial reagents were purchased from commercial sources and used without purification. NMR spectra were recorded on a Varian Mercury spectrometer (400 MHz and 600 MHz). Chemical shifts are reported as  $\delta$  values in ppm and are calibrated according to TMS. LCMS/ HRMS were recorded on a Bruker Daltonics Data analysis 3.4 mass spectrometer and a Thermo LTQ Orbitrap-XL mass spectrometer. High performance liquid chromatography (HPLC) was performed with a YoungLin instrument SP930D, one equipped with Dikma C18 columns using methanol as an eluent. X-Ray data were collected on a Bruker APEX-II equipped with a CCD area detector using Mo/K $\alpha$  radiation. The structures were solved by direct method using SHELXL-97. Unless specified otherwise, all tested compounds were confirmed to be >95% pure by HPLC.

**General procedure for the preparation of 3-amino-1,2,4-triazole derivatives (**3**)<sup>27</sup>.** A mixture of N-cyanoimidates (1mmol) and phenylhydrazine (1.2 mmol) were refluxed for 4h in methanol (3 mL). Then the solvent was removed in vacuo and the residue was purified by flash chromatography on silica gel to afford **3**.

**General procedure for the synthesis of 2-chloro-N-(1H-1,2,4-triazol-5-yl)acetamide derivatives (**4**).** To a solution of **3** (14.4 mmol) in CH<sub>2</sub>Cl<sub>2</sub> (80 mL) were added dropwise triethylamine (6 mL, 43.2 mmol) and 2-chloroacetyl chloride (4.3 mL, 57.6 mmol) in ice bath under N<sub>2</sub>, the resultant mixture was stirred at room temperature for 5 h, diluted with CH<sub>2</sub>Cl<sub>2</sub> (120 mL) and then the organic solution was washed with saturated Na<sub>2</sub>CO<sub>3</sub> (2 x 100 mL), water (2 x 100 mL) and brine (100mL). The organic layer was dried over Na<sub>2</sub>SO<sub>4</sub> and concentrated. The residue was purified by flash chromatography to afford **4**.

**General procedure for the synthesis of N-(1,3-disubstituted-1H-1,2,4-triazol-5-yl)-2-phenoxyacetamides (**5**).** Phenol (744 mg, 6 mmol) was reacted with sodium hydride (244 mg, 12 mmol) in THF

(10mL) at room temperature for 1h, then concentrated and dried in vacuo to afford sodium phenoxide. To the flask containing in situ prepared sodium phenoxide were added 4 (2 mmol) and freshly distilled DMF (10 mL). The resultant mixture was stirred at 50 °C under N<sub>2</sub> for 5 h and quenched with water (100 mL). The reaction solution was extracted with ethyl acetate (3 x 60 mL). The combined organic layer was washed with water (2 x 100 mL) and brine (1 x 100 mL), dried over Na<sub>2</sub>SO<sub>4</sub> and concentrated in vacuo. The residue was purified by flash chromatography to afford 5.

**General procedure for the synthesis of 1,3-disubstituted-N-(2-phenoxyethyl)-1H-1,2,4-triazol-5-amines (6).** To a solution of 5 (1.5 mmol) in redistilled THF (20 mL) was added LiAlH<sub>4</sub> (228 mg, 6 mmol) and AlCl<sub>3</sub> (339 mg, 3 mmol) at -20 °C under N<sub>2</sub>. The reaction solution was warmed slowly to room temperature and continued to stir for 6 h, then diluted with ethyl acetate (60 mL). The organic layer was separated and washed with 10% H<sub>2</sub>SO<sub>4</sub> solution (2 x 60 mL) and water (1 x 100 mL). After dried over Na<sub>2</sub>SO<sub>4</sub>, the solution was filtered and concentrated in vacuum. The residue was purified by flash chromatography to afford 6.

**General procedure for synthesis of 4-triazolyl-1-oxa-4-azaspiro[4,5]deca-6,9-dien-3,8-diones (1) and 4-triazolyl-1-oxa-4-azaspiro[4,5]deca-6,9-dien-8-ones (2).** A flame dried round bottom flask was charged, under a nitrogen atmosphere, with 5 or 6 (0.1mmol), PhI(CF<sub>3</sub>CO<sub>2</sub>)<sub>2</sub> (0.25 mmol) and Cu[(CH<sub>3</sub>CN)<sub>4</sub>]ClO<sub>4</sub> (0.01 mmol, for 5 to 1) or Cu(CF<sub>3</sub>SO<sub>3</sub>)<sub>2</sub> (0.015 mmol, for 6 to 2). The fresh distilled dichloromethane (10 mL) was added. After stirred at room temperature for 5h, the mixture was washed with saturated NaCl solution and dried over MgSO<sub>4</sub>. The solution was filtered and concentrated in vacuum. The residue was purified by flash chromatography on silica gel using petroleum ether/ethyl acetate as an eluent to give 1 or 2.

#### **<sup>1</sup>H-NMR (CDCl<sub>3</sub>), <sup>13</sup>C-NMR (CDCl<sub>3</sub>) and HR-MS data of compounds**

**4-(1,3-Diphenyl-1H-1,2,4-triazol-5-yl)-1-oxa-4-azaspiro[4.5]deca-6,9-diene-3,8-dione (1a).** <sup>1</sup>H-NMR (CDCl<sub>3</sub>, 400MHz) δ (ppm): 8.07-8.05 (m, 2H), 7.56-7.50 (m, 5H), 7.45-7.42 (m, 3H), 6.56 (d, *J* = 10.0 Hz, 2H), 6.14 (d, *J* = 10.0 Hz, 2H), 4.56 (s, 2H). <sup>13</sup>C-NMR (CDCl<sub>3</sub>, 100MHz) δ (ppm): 183.5, 170.3, 161.8, 142.2, 141.7, 136.3, 131.1, 129.9, 129.9, 129.8, 129.6, 128.6, 126.4, 124.8, 88.1 and 66.0. HRMS (ESI) *m/z* (%) for C<sub>22</sub>H<sub>17</sub>N<sub>4</sub>O<sub>3</sub> (M+H): Calcd. 385.1301; Found 385.1293.

**4-(1,3-Diphenyl-1H-1,2,4-triazol-5-yl)-6-methoxy-1-oxa-4-azaspiro-[4.5]deca-6,9-diene-3,8-dione (1b).** <sup>1</sup>H-NMR (CDCl<sub>3</sub>, 400MHz) δ (ppm): 8.05-8.02 (m, 2H), 7.55-7.51 (m, 5H), 7.44-7.41 (m, 3H), 6.30 (d, *J* = 10.0 Hz, 1H), 6.10 (dd, *J* = 10.0, 1.6 Hz, 1H), 5.47 (d, *J* = 1.6 Hz, 1H), 4.70 (d, *J* = 14.4 Hz, 1H), 4.51 (d, *J* = 14.4 Hz, 1H), 3.69 (s, 3H). <sup>13</sup>C-NMR (CDCl<sub>3</sub>, 100MHz) δ (ppm): 185.1, 171.2, 168.9, 161.6, 138.2, 136.3, 132.1, 129.9, 129.8, 129.6, 129.4, 126.2, 124.6, 103.0, 88.0, 67.5 and 56.3. HRMS (ESI) for C<sub>23</sub>H<sub>19</sub>N<sub>4</sub>O<sub>4</sub> (M+H): Calcd. 415.1406; Found 415.1402.

**4-(1-Methyl-3-phenyl-1H-1,2,4-triazol-5-yl)-1-oxa-4-azaspiro[4.5]- deca-6,9-diene-3,8-dione (1c).** <sup>1</sup>H-NMR (CDCl<sub>3</sub>, 400MHz) δ (ppm): 7.91-7.90 (m, 2H), 7.39 (br, 3H), 6.90 (d, *J* = 10.0 Hz, 2H), 6.35 (d, *J* = 10.0 Hz, 2H), 4.64 (s, 2H), 3.88 (s, 3H). <sup>13</sup>C-NMR (CDCl<sub>3</sub>, 100MHz) δ (ppm): 183.6, 168.9, 160.6, 143.0, 141.7, 131.4, 130.1, 139.5, 128.5, 125.9, 88.0, 65.8 and 36.1. HRMS (ESI) *m/z* (%) for C<sub>17</sub>H<sub>14</sub>N<sub>4</sub>O<sub>3</sub>Na (M+Na): Calcd. 345.0964; Found 345.0988.

**4-(1-Methyl-5-phenyl-1H-1,2,4-triazol-3-yl)-1-oxa-4-azaspiro[4.5]- deca-6,9-diene-3,8-dione (1d).** <sup>1</sup>H-NMR (CDCl<sub>3</sub>, 400MHz) δ (ppm): 7.59-7.57 (m, 2H), 7.50-7.49 (m, 2H), 6.90 (d, *J* = 10.0 Hz, 2H), 6.31 (d, *J* = 10.0 Hz, 2H), 4.61 (s, 2H), 3.96 (s, 3H). <sup>13</sup>C-NMR (CDCl<sub>3</sub>, 100MHz) δ (ppm): 184.5, 168.9, 155.2, 151.1, 143.2, 130.9, 130.6, 128.9, 128.7, 119.1, 87.7, 66.4 and 29.3. HRMS (ESI) *m/z* (%) for C<sub>17</sub>H<sub>14</sub>N<sub>4</sub>O<sub>3</sub>Na (M+Na): Calcd. 345.0964; Found 345.0965.

**4-(3-(4-Nitrophenyl)-1-phenyl-1H-1,2,4-triazol-5-yl)-1-oxa-4-azaspiro[4.5]deca-6,9-diene-3,8-dione (1e).** <sup>1</sup>H-NMR (CDCl<sub>3</sub>, 400MHz) δ (ppm): 8.30 (d, *J* = 8.8 Hz, 2H), 8.24 (d, *J* = 8.8 Hz, 2H), 7.59-7.57 (m, 3H), 7.52-7.51 (m, 2H), 6.57 (d, *J* = 10.0 Hz, 2H), 6.16 (d, *J* = 10.0 Hz, 2H), 4.58 (s, 2H). <sup>13</sup>C-NMR (CDCl<sub>3</sub>, 100MHz) δ (ppm): 183.4, 170.2, 159.8, 148.6, 143.1, 141.4, 136.0, 135.9, 131.2, 130.3, 129.8, 127.1, 124.7, 124.0, 88.2 and 65.9. HRMS (ESI) *m/z* (%) for C<sub>22</sub>H<sub>16</sub>N<sub>5</sub>O<sub>5</sub> (M+H): Calcd. 430.1151; Found 430.1144.

**4-(3-(5-Chloro-2-nitrophenyl)-1-phenyl-1H-1,2,4-triazol-5-yl)-1-oxa-4-azaspiro[4.5]deca-6,9-diene-3,8-dione (1f).** <sup>1</sup>H-NMR (CDCl<sub>3</sub>, 400MHz) δ (ppm): 7.95 (d, *J* = 2.4 Hz, 1H), 7.71 (d, *J* = 8.4 Hz, 1H), 7.56-7.49 (m, 6H), 6.52 (d, *J* = 10.0 Hz, 2H), 6.22 (d, *J* = 10.0 Hz, 2H), 4.54 (s, 2H). <sup>13</sup>C-NMR (CDCl<sub>3</sub>, 100MHz) δ (ppm): 183.3, 170.0, 157.0, 142.6, 140.9, 138.1, 135.8, 131.5, 130.9, 130.4, 130.3, 130.2, 129.7, 125.4, 125.3, 124.6, 88.4 and 64.9. HRMS (ESI) *m/z* (%) for C<sub>22</sub>H<sub>15</sub>ClN<sub>5</sub>O<sub>5</sub> (M+H): Calcd. 464.0762; Found 464.0749.

**4-(3-(4-Chlorophenyl)-1-phenyl-1H-1,2,4-triazol-5-yl)-1-oxa-4-azaspiro[4.5]deca-6,9-diene-3,8-dione (1g).** <sup>1</sup>H-NMR (CDCl<sub>3</sub>, 400MHz) δ (ppm): 7.90 (d, *J* = 4.4 Hz, 2H), 7.56-7.49 (m, 8H), 7.41(d, *J* = 8.4Hz, 3H), 6.55(d, *J* = 10.0 Hz, 2H), 6.14(d, *J* = 10.0 Hz, 2H), 4.57(s, 2H). <sup>13</sup>C-NMR (CDCl<sub>3</sub>, 100MHz) δ (ppm): 183.4, 170.2, 160.8, 142.4, 141.5, 136.0, 135.8, 131.0, 130.0, 129.6, 128.8, 128.3, 127.6, 124.7, 88.0 and 65.9. HRMS (ESI) *m/z* (%) for C<sub>22</sub>H<sub>16</sub>ClN<sub>4</sub>O<sub>3</sub> (M+H): Calcd. 419.0911; Found 419.0908.

**4-(3-(2,4-Dichlorophenyl)-1-phenyl-1H-1,2,4-triazol-5-yl)-1-oxa-4-azaspiro[4.5]deca-6,9-diene-3,8-dione (1h).** <sup>1</sup>H-NMR (CDCl<sub>3</sub>, 400MHz) δ (ppm): 7.81(d, *J* = 8.0 Hz, 1H), 7.55-7.51(m, 8H), 7.34-7.31(m, 1H), 6.58 (d, *J* = 10.0 Hz, 2H), 6.18 (d, *J* = 10.0 Hz, 2H), 4.57(s, 2H). <sup>13</sup>C-NMR (CDCl<sub>3</sub>, 100MHz) δ (ppm): 183.4, 170.1, 159.5, 142.0, 141.4, 136.0, 133.7, 132.0, 131.2, 130.6, 130.1, 129.7, 129.5, 127.4, 127.1, 124.6, 88.3 and 66.0. HRMS (ESI) *m/z* (%) for C<sub>22</sub>H<sub>15</sub>Cl<sub>2</sub>N<sub>4</sub>O<sub>3</sub> (M+H): Calcd.453.0521; Found 453.0512.

**4-(1-Phenyl-3-*p*-tolyl-1H-1,2,4-triazol-5-yl)-1-oxa-4-azaspiro- [4.5]deca-6,9-diene-3,8-dione (1i).** <sup>1</sup>H-NMR (CDCl<sub>3</sub>, 400MHz) δ (ppm): 7.94(d, *J* = 8.0 Hz, 2H), 7.56-7.50 (m, 5H), 7.24 (d, *J* = 8.0 Hz, 4H), 6.55(d, *J* = 10.0 Hz, 2H), 6.13(d, *J* = 10.0 Hz, 2H), 4.56 (s, 2H), 2.39 (s, 3H). <sup>13</sup>C-NMR (CDCl<sub>3</sub>, 100MHz) δ (ppm):183.4, 170.2, 161.8, 142.1, 141.6, 140.0, 136.1, 130.9, 129.8, 129.5, 129.3, 127.0, 126.1, 124.7, 88.0, 65.9 and 21.4. HRMS (ESI) *m/z* (%) for C<sub>23</sub>H<sub>19</sub>N<sub>4</sub>O<sub>3</sub> (M+H): Calcd.399.1457; Found 399.1458.

**4-(3-(4-Methoxyphenyl)-1-phenyl-1H-1,2,4-triazol-5-yl)-1-oxa-4-azaspiro[4.5]deca-6,9-diene-3,8-dione (1j).** <sup>1</sup>H-NMR (CDCl<sub>3</sub>, 400MHz) δ (ppm): 7.98 (d, *J* = 8.8 Hz, 2H), 7.54-7.50 (m, 5H), 6.95 (d, *J* = 8.8 Hz, 2H), 6.55 (d, *J* = 10.0 Hz, 2H), 6.13 (d, *J* = 10.0 Hz, 2H), 4.56 (s, 2H), 3.86 (s, 3H). <sup>13</sup>C-NMR (CDCl<sub>3</sub>, 100MHz) δ (ppm): 183.4, 170.3, 161.7, 160.9, 141.7, 141.6, 136.2, 130.9, 129.8, 129.6, 127.8, 124.7, 122.5, 113.9, 88.1, 65.9 and 55.3. HRMS (ESI) for C<sub>23</sub>H<sub>19</sub>N<sub>4</sub>O<sub>4</sub> (M+H): Calcd. 415.1406; Found 415.1415.

**4-(1-(4-Methoxyphenyl)-3-phenyl-1H-1,2,4-triazol-5-yl)-1-oxa-4-azaspiro[4.5] deca-6,9-diene-3,8-dione (1k).** <sup>1</sup>H-NMR (CDCl<sub>3</sub>, 400 MHz) δ (ppm): 3.89 (s, 3H), 4.55 (s, 2H), 6.15 (d, *J* = 10.0 Hz, 2H), 6.85 (d, *J* = 10.0 Hz, 2H), 7.02 (d, *J* = 8.8 Hz, 2H), 7.44-7.41 (m, 5H), 8.06-8.03 (m, 2H). <sup>13</sup>C-NMR (CDCl<sub>3</sub>, 100 MHz) δ (ppm): 183.5, 170.3, 161.6, 160.5, 141.8, 141.8, 130.9, 129.9, 129.8, 128.9, 128.6, 126.4, 126.3, 114.6, 88.0, 66.0 and 55.6. HRMS (ESI) for C<sub>23</sub>H<sub>19</sub>N<sub>4</sub>O<sub>4</sub> (M+H): Calcd. 415.1406; Found 415.1396.

**4-(1-Phenyl-3-(thiophen-2-yl)-1H-1,2,4-triazol-5-yl)-1-oxa-4-azaspiro[4.5]deca-6,9-diene-3,8-dione (1l).** Gray solid, m.p. 136-138 °C. <sup>1</sup>H-NMR (CDCl<sub>3</sub>, 400 MHz) δ (ppm): 7.68 (d, *J* = 3.6 Hz, 1H), 7.55-7.50 (m, 5H), 7.38 (d, *J* = 4.8 Hz, 1H), 7.10 (t, *J* = 4.0 Hz, 1H), 6.54 (d, *J* = 10.0 Hz, 2H), 6.13 (d, *J* = 10.0 Hz, 2H), 4.55 (s, 2H). <sup>13</sup>C-NMR (CDCl<sub>3</sub>, 100 MHz) δ (ppm): 183.4, 170.3, 158.0, 142.2, 141.5, 135.9, 132.5, 131.0, 130.0, 129.6, 127.7, 127.3, 127.1, 124.8, 88.1 and 66.0. HRMS (ESI) for C<sub>20</sub>H<sub>15</sub>N<sub>4</sub>O<sub>3</sub>S (M+H): Calcd. 391.0865; Found 391.0866.

**4-(3-(Furan-2-yl)-1-phenyl-1H-1,2,4-triazol-5-yl)-1-oxa-4-azaspiro- [4.5]deca-6,9-diene-3,8-dione (1m).** White solid, m.p. 149-151 °C. <sup>1</sup>H-NMR (CDCl<sub>3</sub>, 400 MHz) δ (ppm): 7.55-7.48 (m, 7H), 7.00 (d, *J* = 2.8 Hz, 1H), 6.54-6.51(m, 2H), 6.11(d, *J* = 10.0 Hz, 2H), 4.56 (s, 2H). <sup>13</sup>C-NMR (CDCl<sub>3</sub>, 100 MHz) δ (ppm): 183.2, 170.3, 154.9, 145.0, 143.7, 142.2, 141.4, 135.7, 131.0, 130.0, 129.5, 124.7, 88.0 and 65.8. HRMS (ESI) for C<sub>20</sub>H<sub>15</sub>N<sub>4</sub>O<sub>4</sub> (M+H): Calcd. 375.1093; Found 375.1094.

**4-(1-(3-Chlorophenyl)-3-phenyl-1H-1,2,4-triazol-5-yl)-1-oxa-4-azaspiro[4.5] deca-6,9-diene-3,8-dione (1n).** Gray solid, m.p. 168-170 °C. <sup>1</sup>H-NMR (CDCl<sub>3</sub>, 400 MHz) δ (ppm): 8.04-8.02 (m, 2H), 7.56-7.42 (m, 7H), 6.64 (d, *J* = 10.0 Hz, 2H), 6.20 (d, *J* = 10.0 Hz, 2H), 4.57 (s, 2H). <sup>13</sup>C-NMR (CDCl<sub>3</sub>, 100 MHz) δ (ppm): 183.4, 170.2, 161.9, 142.5, 141.6, 137.3, 135.4, 131.2, 130.6, 130.1, 130.0, 129.6, 128.7, 126.4, 125.0, 122.5, 88.2 and 65.9. HRMS (ESI) for C<sub>22</sub>H<sub>16</sub>ClN<sub>4</sub>O<sub>3</sub> (M+H): Calcd. 419.0911; Found 419.0907.

**7-Bromo-4-(1,3-diphenyl-1H-1,2,4-triazol-5-yl)-1-oxa-4-azaspiro[4.5] deca-6,9-diene-3,8-dione (1o).** <sup>1</sup>H-NMR (CDCl<sub>3</sub>, 400 MHz) δ (ppm): 8.06 (m, 2H), 7.58-7.57 (m, 3H), 7.52-7.49 (m, 2H), 7.46-7.43 (m, 3H), 6.81 (d, *J* = 10.0 Hz, 1H), 6.73 (dd, *J* = 10.0 and 2.8 Hz, 1H), 6.30 (d, *J* = 10.0 Hz, 1H), 4.56 (s, 2H). <sup>13</sup>C-NMR (CDCl<sub>3</sub>, 100 MHz) δ (ppm): 176.4, 169.8, 161.9, 142.4, 142.3, 136.0, 130.1, 130.0, 129.8, 129.6, 128.6, 127.4, 126.3, 124.8, 89.6 and 65.9. HRMS (ESI) for C<sub>22</sub>H<sub>16</sub>BrN<sub>4</sub>O<sub>3</sub> (M+H): Calcd. 463.0406; Found 463.0402.

**4-(3-(3-Chlorophenyl)-1-phenyl-1H-1,2,4-triazol-5-yl)-1-oxa-4-azaspiro[4.5] deca-6,9-diene-3,8-dione (1p).** <sup>1</sup>H-NMR (CDCl<sub>3</sub>, 400 MHz) δ (ppm): 8.09 (s, 1H), 7.96 (d, *J* = 6.9 Hz, 1H), 7.56-7.53 (m, 5H), 7.40-7.35 (m, 3H), 6.57 (d, *J* = 9.6 Hz, 2H), 6.16 (d, *J* = 9.6 Hz, 2H), 4.58 (s, 2H). <sup>13</sup>C-NMR (CDCl<sub>3</sub>, 100 MHz) δ (ppm): 183.1, 170.3, 160.7, 142.5, 141.6, 136.1, 134.7, 131.7, 131.1, 130.1, 130.0, 129.9, 129.7, 126.5, 124.8, 124.4, 88.2 and 66.0. HRMS (ESI) for C<sub>22</sub>H<sub>16</sub>ClN<sub>4</sub>O<sub>3</sub> (M+H): Calcd. 419.0911, 421.0881; Found 419.0906, 421.0881.

**4-(1,3-Diphenyl-1H-1,2,4-triazol-5-yl)-1-oxa-4-azaspiro[4.5]- deca-6,9-dien-8-one (2a).** Pale yellow solid, m.p. 119-121 °C. <sup>1</sup>H-NMR (CDCl<sub>3</sub>) δ (ppm): 8.05-8.03 (m, 2H), 7.41-7.37 (m, 8H), 6.49 (d, *J* = 10.4 Hz, 2H), 5.90 (d, *J* = 10.0 Hz, 2H), 4.27 (t, *J* = 6.0 Hz, 2H), 3.88(t, *J* = 6.0 Hz, 2H). <sup>13</sup>C-NMR (CDCl<sub>3</sub>) δ (ppm): 184.8, 159.8, 153.5, 143.5, 137.5, 130.6, 129.5, 129.3, 128.9, 128.7, 128.5, 126.2, 125.4, 87.7, 66.0 and 50.0. HRMS (ESI) for C<sub>22</sub>H<sub>19</sub>N<sub>4</sub>O<sub>2</sub> (M+H): Calcd. 371.1508; Found 371.1507.

**4-(1-Phenyl-3-(*p*-tolyl)-1H-1,2,4-triazol-5-yl)-1-oxa-4-azaspiro- [4.5]deca-6,9-dien-8-one (2b).** Pale yellow solid, m.p. 142-144 °C. <sup>1</sup>H-NMR (CDCl<sub>3</sub>) δ (ppm): 7.93 (d, *J* = 8.0 Hz, 2H), 7.46-7.37 (m, 5H), 7.22 (d, *J* = 8.0 Hz, 2H), 6.47 (d, *J* = 10.0 Hz, 2H), 5.88 (d, *J* = 10.0 Hz, 2H), 4.25 (t, *J* = 6.4 Hz, 2H), 3.88 (t, *J* = 6.4 Hz, 2H). <sup>13</sup>C-NMR (CDCl<sub>3</sub>,

100MHz)  $\delta$  (ppm): 184.8, 159.8, 143.5, 139.2, 137.5, 131.9, 129.3, 128.7, 127.8, 126.0, 125.4, 120.2, 87.7, 66.0, 49.9, 29.6 and 21.3. HRMS (ESI) for  $C_{23}H_{21}N_4O_2$  (M+H): Calcd. 385.1665; Found 385.1668.

**4-(3-(4-Methoxyphenyl)-1-phenyl-1H-1,2,4-triazol-5-yl)-1-oxa-4-azaspiro[4.5] deca-6,9-dien-8-one (2c).** Pale yellow solid, m.p. 118-121 °C.  $^1H$ -NMR ( $CDCl_3$ )  $\delta$  (ppm): 7.97 (d,  $J$  = 8.8 Hz, 2H), 7.46-7.37 (m, 5H), 6.94 (d,  $J$  = 9.2 Hz, 2H), 6.49 (d,  $J$  = 10.0 Hz, 2H), 5.90 (d,  $J$  = 10.0 Hz, 2H), 4.26 (t,  $J$  = 6.0 Hz, 2H), 3.87 (t,  $J$  = 6.0 Hz, 2H).  $^{13}C$ -NMR ( $CDCl_3$ )  $\delta$  (ppm): 184.8, 160.5, 159.6, 153.3, 143.5, 137.5, 129.4, 128.9, 128.6, 127.6, 125.4, 123.3, 113.8, 87.7, 66.0, 55.2 and 49.9. HRMS (ESI) for  $C_{23}H_{21}N_4O_3$  (M+H): Calcd. 401.1614; Found 401.1609.

**4-(3-(4-Chlorophenyl)-1-phenyl-1H-1,2,4-triazol-5-yl)-1-oxa-4-azaspiro[4.5] deca-6,9-dien-8-one (2d).** Gray solid, m.p. 143-146 °C.  $^1H$ -NMR ( $CDCl_3$ )  $\delta$  (ppm): 7.99 (d,  $J$  = 8.4 Hz, 2H), 7.47-7.29 (m, 7H), 6.50 (d,  $J$  = 10.0 Hz, 2H), 5.94 (d,  $J$  = 10.0 Hz, 2H), 4.28 (t,  $J$  = 6.0 Hz, 2H), 3.87 (t,  $J$  = 6.0 Hz, 2H).  $^{13}C$ -NMR ( $CDCl_3$ )  $\delta$  (ppm): 184.8, 158.8, 153.5, 143.4, 137.4, 135.1, 129.5, 129.2, 129.0, 128.9, 128.7, 127.5, 125.4, 87.7, 66.0 and 49.8. HRMS (ESI) for  $C_{22}H_{18}ClN_4O_2$  (M+H): Calcd. 405.1118; Found 405.1103.

**4-(3-(3-Chlorophenyl)-1-phenyl-1H-1,2,4-triazol-5-yl)-1-oxa-4-azaspiro[4.5] deca-6,9-dien-8-one (2e).** Gray solid, m.p. 185-187 °C.  $^1H$ -NMR ( $CDCl_3$ )  $\delta$  (ppm): 8.06(s, 1H), 7.92-7.90 (m, 1H), 7.45-7.40 (m, 5H), 7.36-7.35 (m, 2H), 6.47 (d,  $J$  = 10.0 Hz, 2H), 5.90 (d,  $J$  = 10.0 Hz, 2H), 4.27 (t,  $J$  = 6.0 Hz, 2H), 3.88 (t,  $J$  = 6.0 Hz, 2H).  $^{13}C$ -NMR ( $CDCl_3$ )  $\delta$  (ppm): 184.7, 158.6, 153.7, 143.4, 132.4, 129.5, 129.3, 129.0, 128.9, 126.2, 125.4, 124.2, 87.7, 66.0 and 50.0. HRMS (ESI)  $m/z$  (%) for  $C_{22}H_{17}ClN_4NaO_2$  (M+Na): Calcd. 427.0938; Found 427.0944.

**4-(3-(2,4-Dichlorophenyl)-1-phenyl-1H-1,2,4-triazol-5-yl)-1-oxa-4-azaspiro[4.5] deca-6,9-dien-8-one (2f).** Pale yellow solid, m.p. 130-132 °C.  $^1H$ -NMR ( $CDCl_3$ )  $\delta$  (ppm): 7.83 (d,  $J$  = 8.0 Hz, 1H), 7.49-7.40 (m, 6H), 7.30 (dd,  $J$  = 8.4, 2.0 Hz, 1H), 6.50 (d,  $J$  = 10.0 Hz, 2H), 5.93 (d,  $J$  = 10.0 Hz, 2H), 4.26 (t,  $J$  = 6.0 Hz, 2H), 3.84 (t,  $J$  = 6.0 Hz, 2H).  $^{13}C$ -NMR ( $CDCl_3$ )  $\delta$  (ppm): 184.8, 157.6, 152.9, 143.4, 137.2, 135.2, 133.4, 131.8, 130.5, 129.5, 129.1, 128.9, 128.1, 127.0, 125.3, 87.8, 66.0 and 49.8. HRMS (ESI) for  $C_{22}H_{17}Cl_2N_4O_2$  (M+H): Calcd. 439.0729; Found 439.0717.

**4-(1-(3-Chlorophenyl)-3-phenyl-1H-1,2,4-triazol-5-yl)-1-oxa-4-azaspiro[4.5]deca-6,9-dien-8-one (2g).** Pale yellow solid, m.p. 136-138 °C.  $^1H$ -NMR ( $CDCl_3$ )  $\delta$  (ppm): 8.05-8.03 (m, 2H), 7.53 (s, 1H), 7.45-7.38 (m, 4H), 7.36-7.35 (m, 2H), 6.51(d,  $J$  = 10.0 Hz, 2H), 5.94 (d,  $J$  = 10.0 Hz, 2H), 4.30 (t,  $J$  = 6.0 Hz, 2H), 3.94 (t,  $J$  = 6.0 Hz, 2H).  $^{13}C$ -NMR ( $CDCl_3$ )  $\delta$  (ppm): 184.4, 160.1, 153.8, 143.3, 138.4, 135.0, 130.6, 129.5, 129.0, 128.6, 128.5, 126.2, 125.3, 123.2, 88.0, 66.0 and 50.2. HRMS (ESI) for  $C_{22}H_{18}ClN_4O_2$  (M+H): Calcd. 405.1118; Found 405.1120.

**4-(1-Phenyl-3-(thiophen-2-yl)-1H-1,2,4-triazol-5-yl)-1-oxa-4-azaspiro[4.5]deca-6,9-dien-8-one (2h).** Pale yellow solid, m.p. 132-134 °C.  $^1H$ -NMR ( $CDCl_3$ )  $\delta$  (ppm): 7.62(m, 1H), 7.43-7.38 (m, 5H), 7.34-7.32 (m, 1H), 7.09-7.07 (m, 1H), 6.47 (d,  $J$  = 10.0 Hz, 2H), 5.91(d,  $J$  = 10.0 Hz, 2H), 4.25 (t,  $J$  = 6.0 Hz, 2H), 3.86 (t,  $J$  = 6.0 Hz, 2H).  $^{13}C$ -NMR ( $CDCl_3$ )  $\delta$  (ppm): 184.7, 156.2, 153.3, 143.3, 137.3, 133.5, 129.0, 128.8, 127.6, 126.6, 126.4, 125.6, 87.7, 66.0 and 50.0. HRMS (ESI) for  $C_{20}H_{17}N_4O_2S$  (M+H): Calcd. 377.1072; Found 377.1076.

**Cell Proliferation Assay.**<sup>18</sup> Breast cancer cell lines, MDA-MB-231 and MCF-7, the cervical cancer cell line, HeLa, and the non-small cell lung carcinoma cell line, cell lines were purchased from ATCC. A549 were routinely cultured in DMEM medium supplemented with 10% FBS, 4 mM glutamine, 1 mM sodium pyruvate, 100 IU/mL penicillin, 100  $\mu$ g/mL streptomycin and 0.25  $\mu$ g/mL amphotericin. Cultures were maintained in 5%  $CO_2$  at a temperature of 37°C. The cells were plated in 24-well plates at a density of 20,000 per well in 10% FBS DMED medium. The cells were then treated with Doxorubicin, or synthesized triazole-spirodienone conjugates separately at 5 different doses ranging from 0.01 mM to 1 nM for 5 days, while equal treatment volumes of DMSO were used as vehicle control. Cell numbers were counted with a cell viability analyzer (BeckmanCoulter). The ratio of drug treated viable cell numbers to vehicle treated viable cell numbers were defined as percentage viability.  $IC_{50}$  values were obtained from dose response curves for each tested compound.

MCF-10A, the normal mammary epithelial cells, were cultured in 50 : 50 DMEM/Hams F12, with, 2.5 mM L-glutamine, 15 mM HEPES, 0.5 mM sodium pyruvate, 1.2 g/L sodium bicarbonate, 20 ng/ml human Epidermal Growth Factor (hEGF), 100 ng/ml cholera toxin, 10  $\mu$ g/ml bovine insulin, 500 ng/ml hydrocortisone and 5% horse serum and grown at 5%  $CO_2$ , 37°C, and 100% humidity. The cells were plated in 24-well plates at a density of 20,000 per well in 10% FBS DMED medium. The cells were then treated with Doxorubicin, or compounds **1a**, **1d-f** and **1i-k** separately at two doses of 10  $\mu$ M and 1  $\mu$ M for 5 days, while equal treatment volumes of DMSO were used as vehicle control.

**Cell Apoptosis Assay.**<sup>17</sup> Cell apoptosis induced by triazole-spirodienone conjugates was detected by using the CellEvent™ Caspase-3/7 Green ReadyProbes® Reagent (ThermoFisher Scientific Company). HeLa cells were grown on cover glasses in a 24-well plate at a concentration of 50,000 cells/well for 24 h incubation at 37 °C. HeLa cells were induced with **1b**, **1i**, **1f**, **1p** and doxorubicin at 1.0  $\mu$ M for an additional 24 h, while equal treatment volumes of DMSO were used as vehicle control. CellEvent™ Caspase-3/7 Green ReadyProbes® Reagent (2 drops per mL of media) was added. After 40 min incubation at room temperature in the darkness, the stained cells were observed and taken pictures using fluorescence microscopy.



$^1\text{H-NMR}$  ( $\text{CDCl}_3$ ) and  $^{13}\text{C-NMR}$  ( $\text{CDCl}_3$ ) of compounds

$^1\text{H-NMR}$  ( $\text{CDCl}_3$ ) and  $^{13}\text{C-NMR}$  ( $\text{CDCl}_3$ ) of compound 1a.

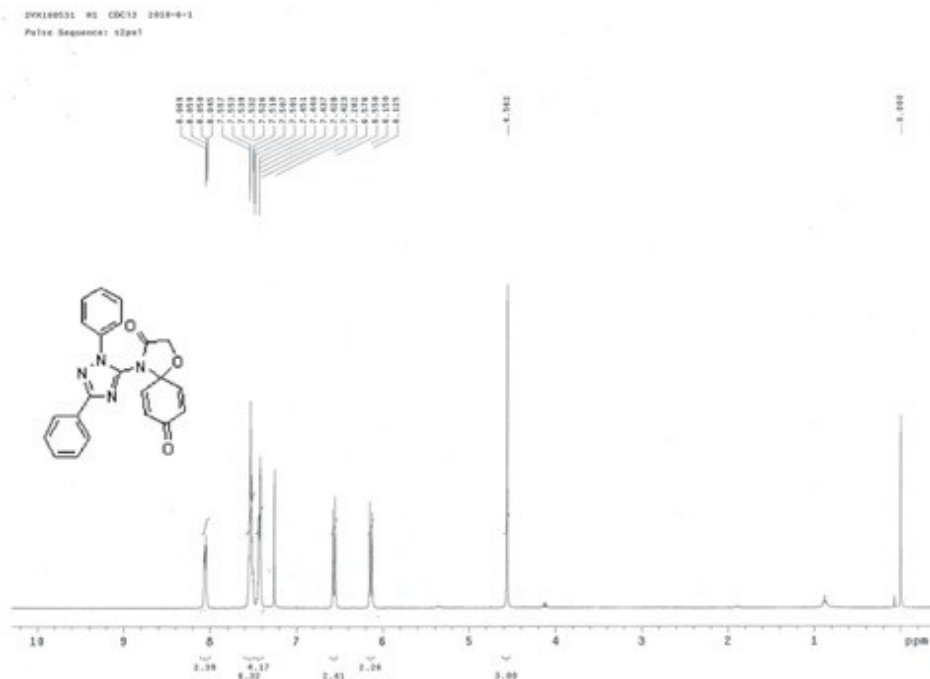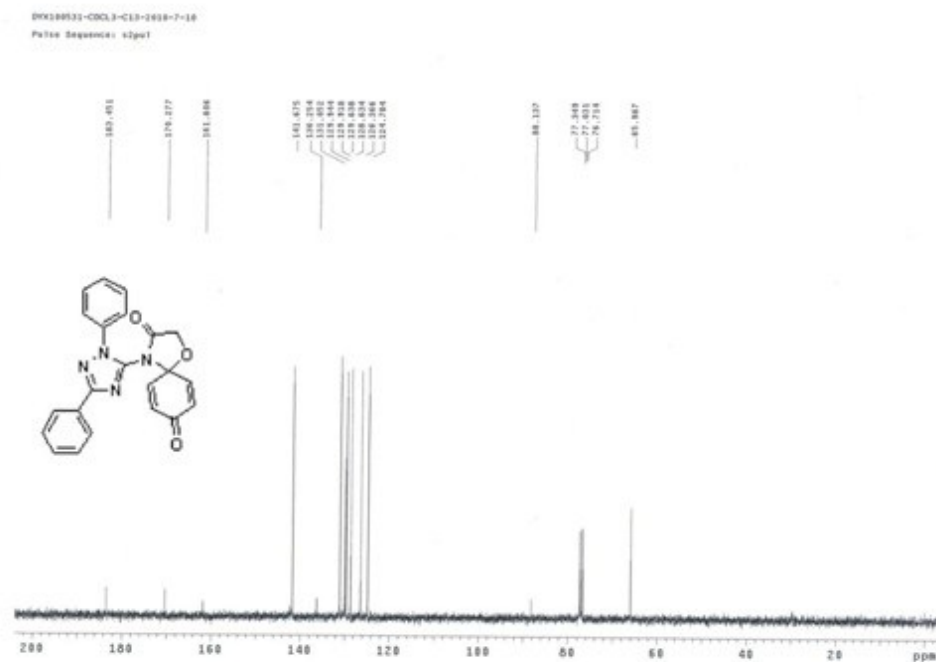

**<sup>1</sup>H-NMR (CDCl<sub>3</sub>) and <sup>13</sup>C-NMR (CDCl<sub>3</sub>) of compound 1b.**

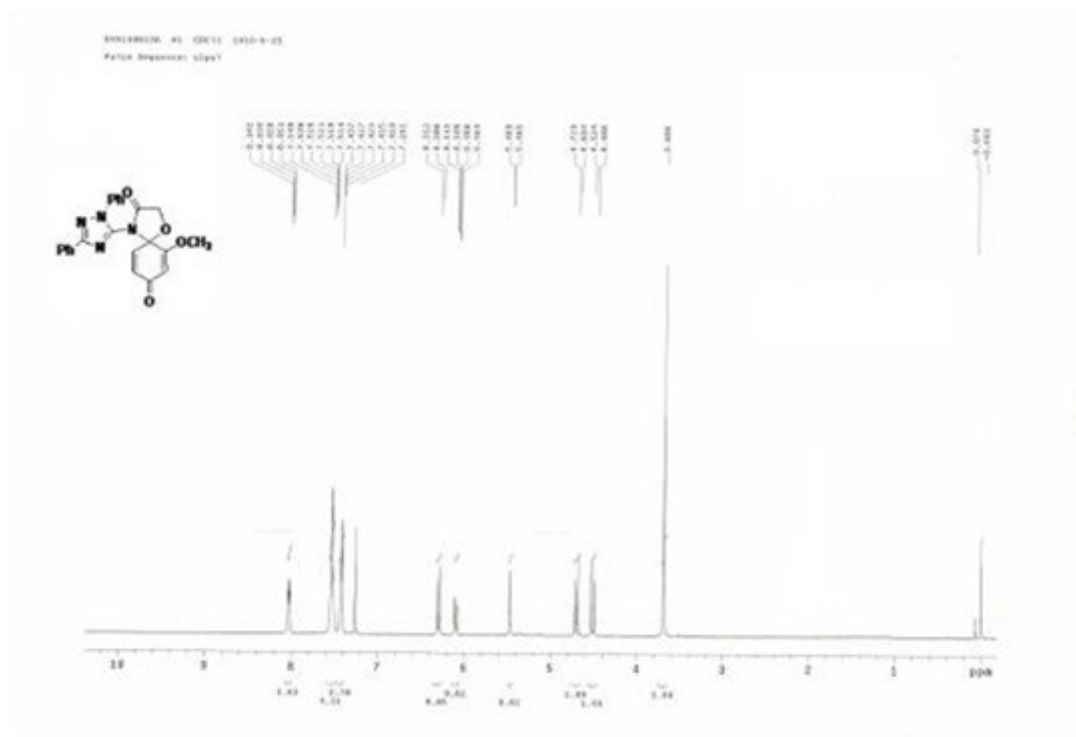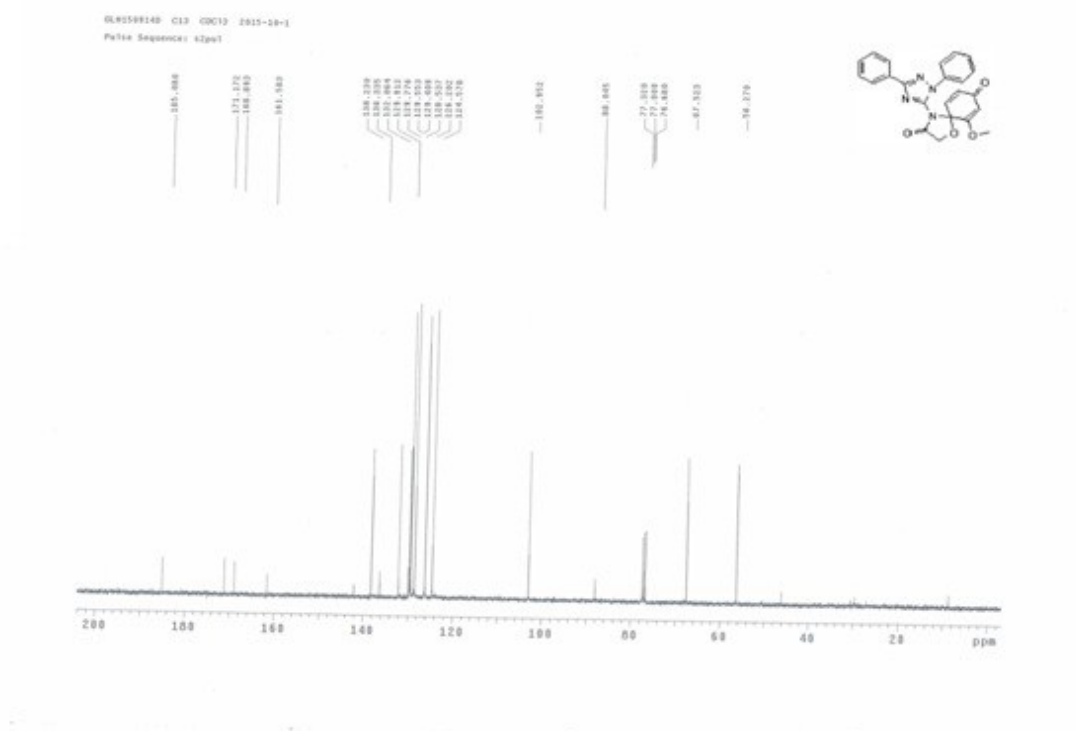

**$^1\text{H-NMR}$  ( $\text{CDCl}_3$ ) and  $^{13}\text{C-NMR}$  ( $\text{CDCl}_3$ ) of compound 1c.**

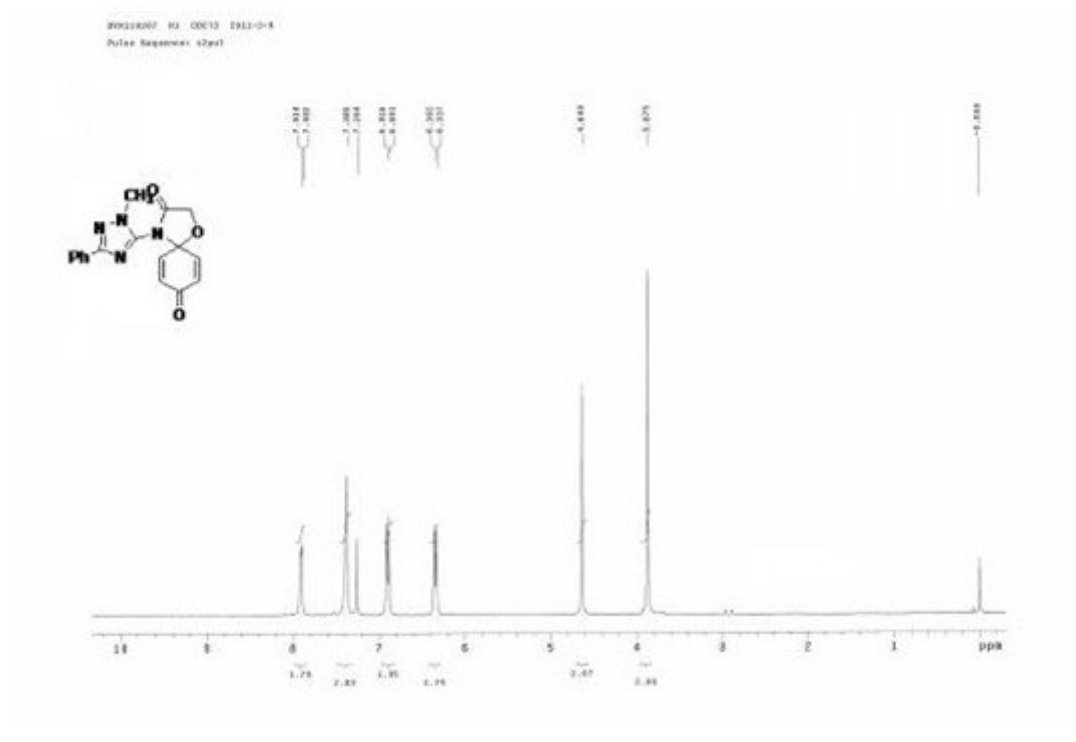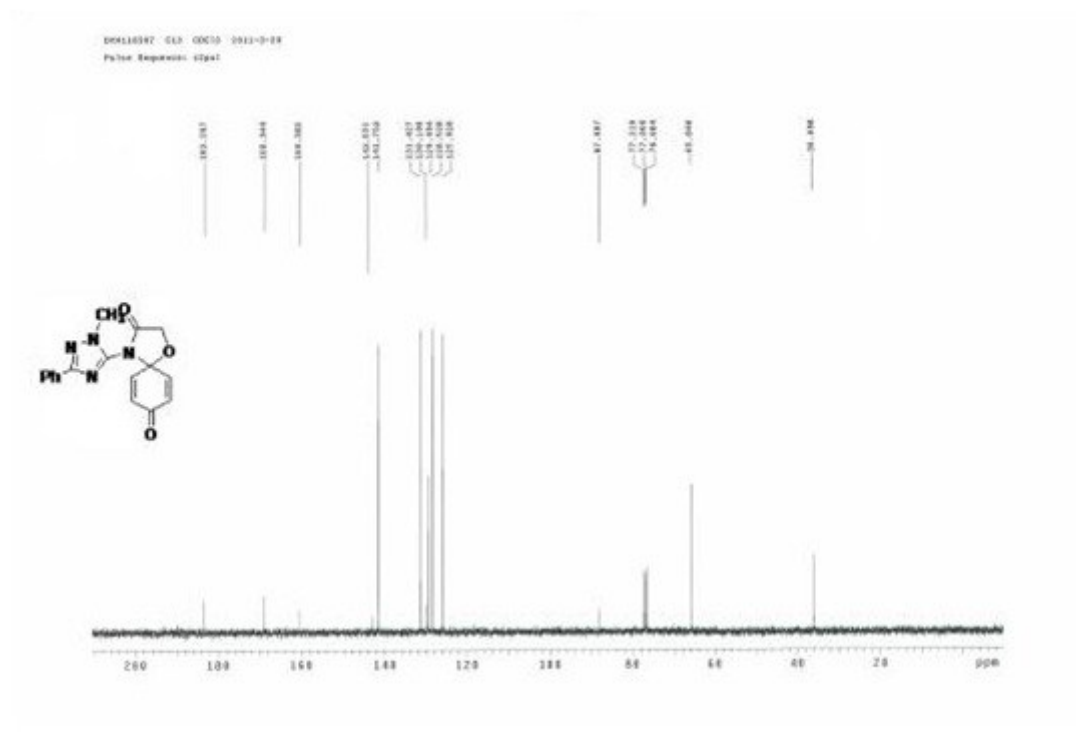



**$^1\text{H-NMR}$  ( $\text{CDCl}_3$ ) and  $^{13}\text{C-NMR}$  ( $\text{CDCl}_3$ ) of compound 1d.**

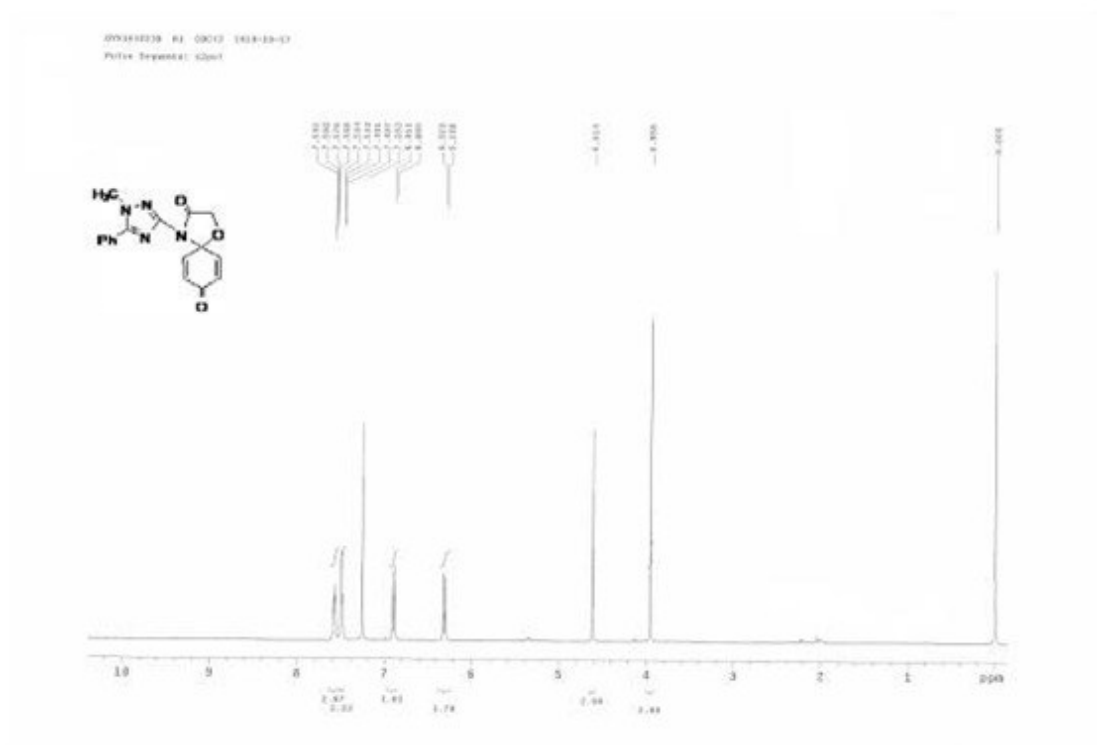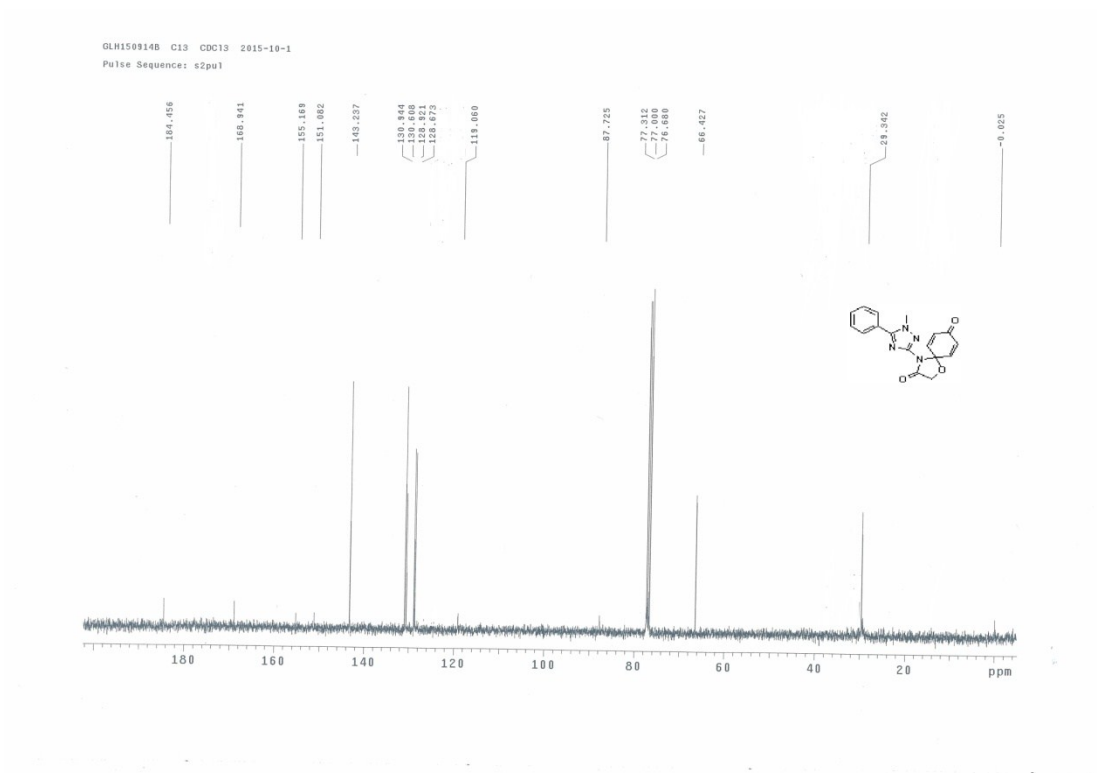

**$^1\text{H-NMR}$  ( $\text{CDCl}_3$ ) and  $^{13}\text{C-NMR}$  ( $\text{CDCl}_3$ ) of compound 1e.**

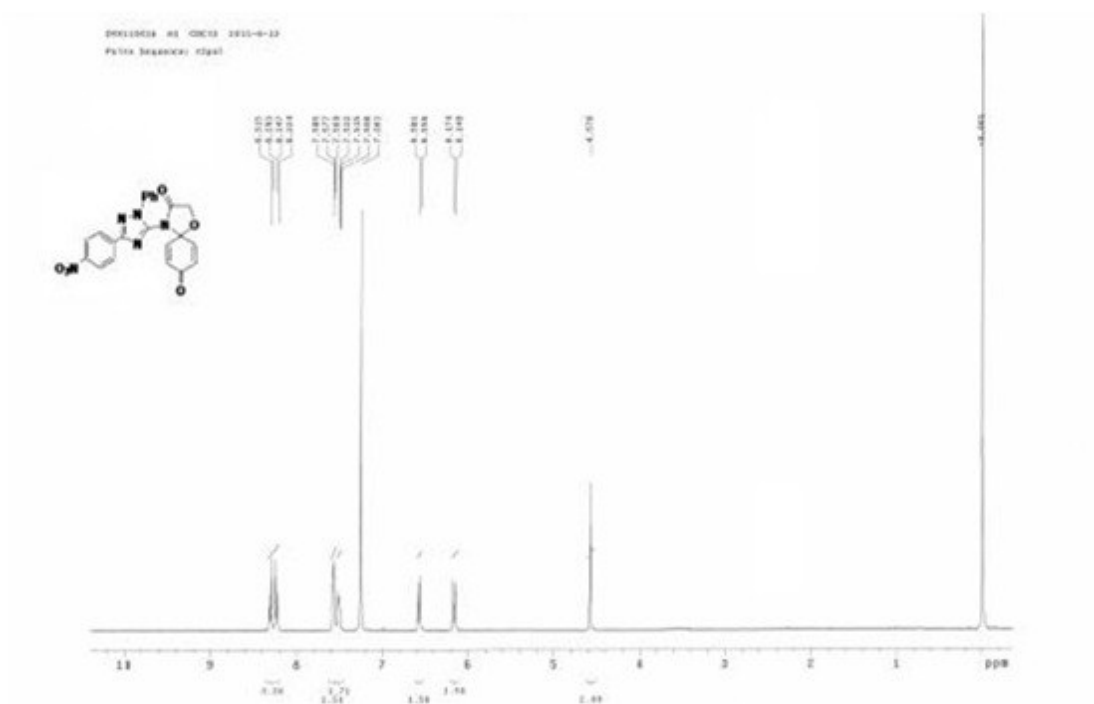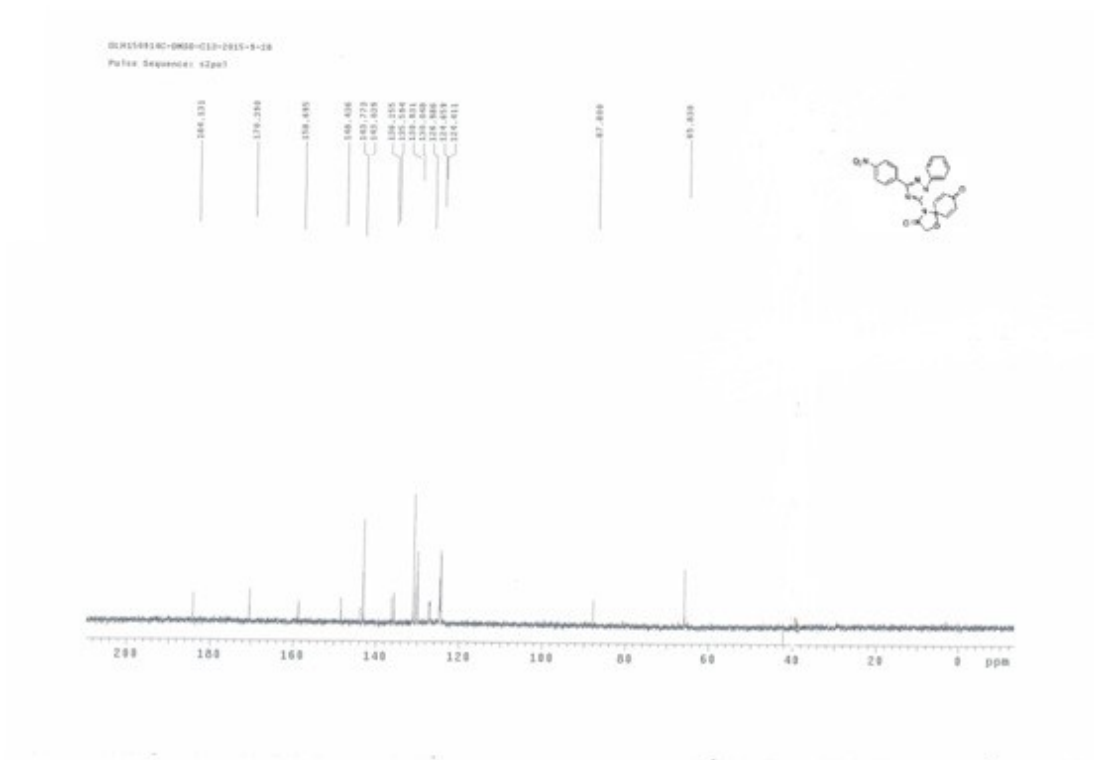

**$^1\text{H-NMR}$  ( $\text{CDCl}_3$ ) and  $^{13}\text{C-NMR}$  ( $\text{CDCl}_3$ ) of compound 1f.**

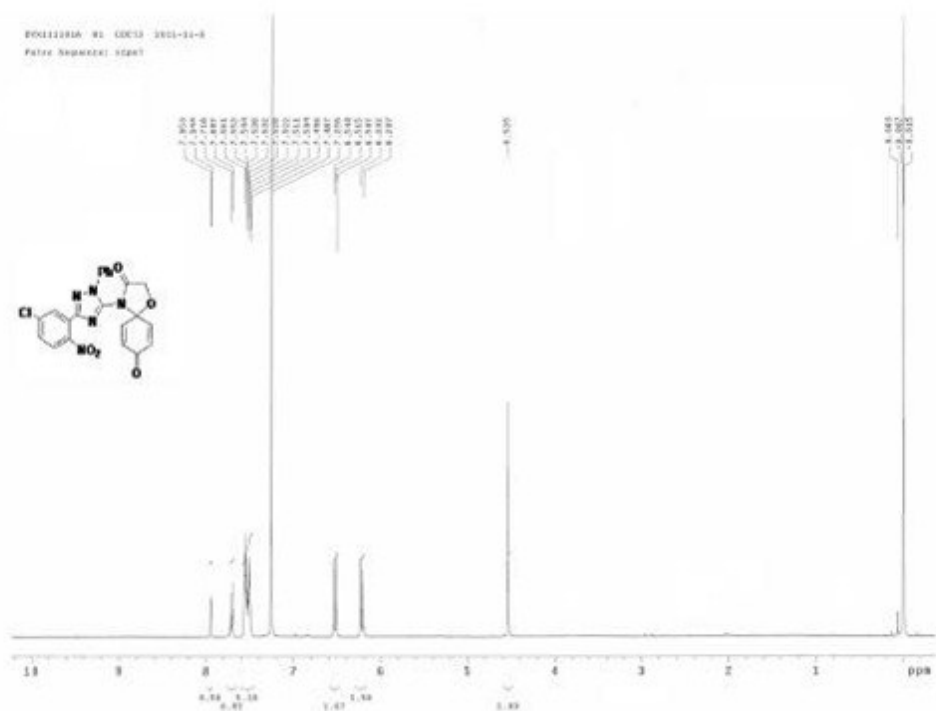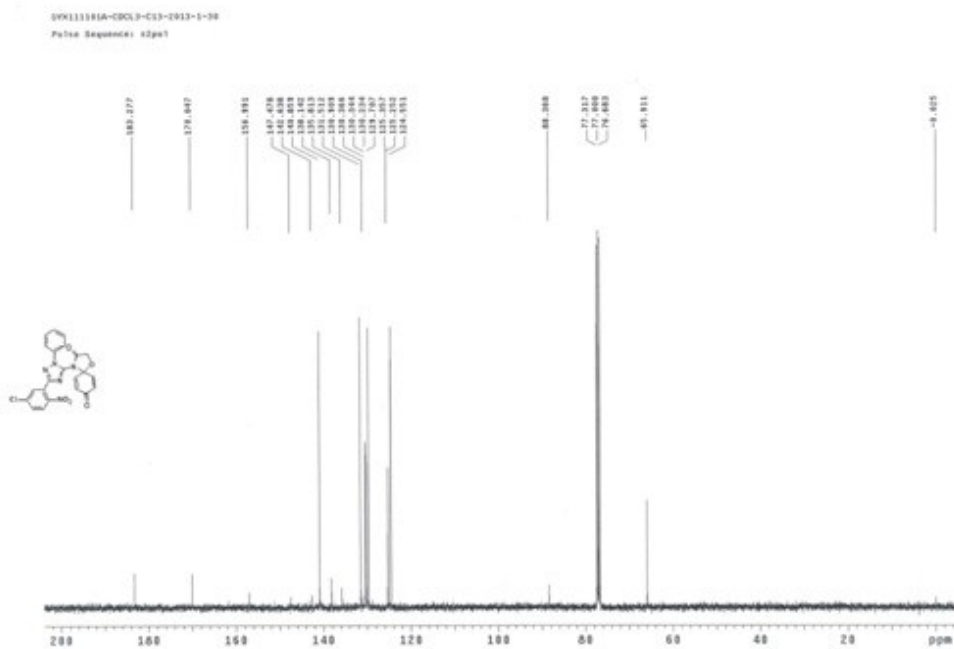

**$^1\text{H-NMR}$  ( $\text{CDCl}_3$ ) and  $^{13}\text{C-NMR}$  ( $\text{CDCl}_3$ ) of compound 1g.**

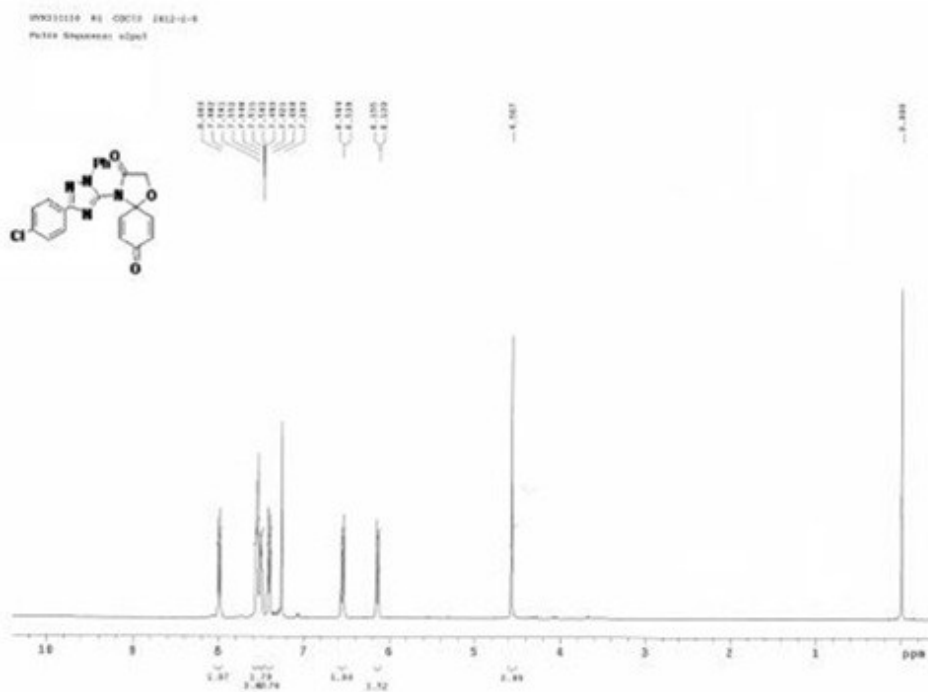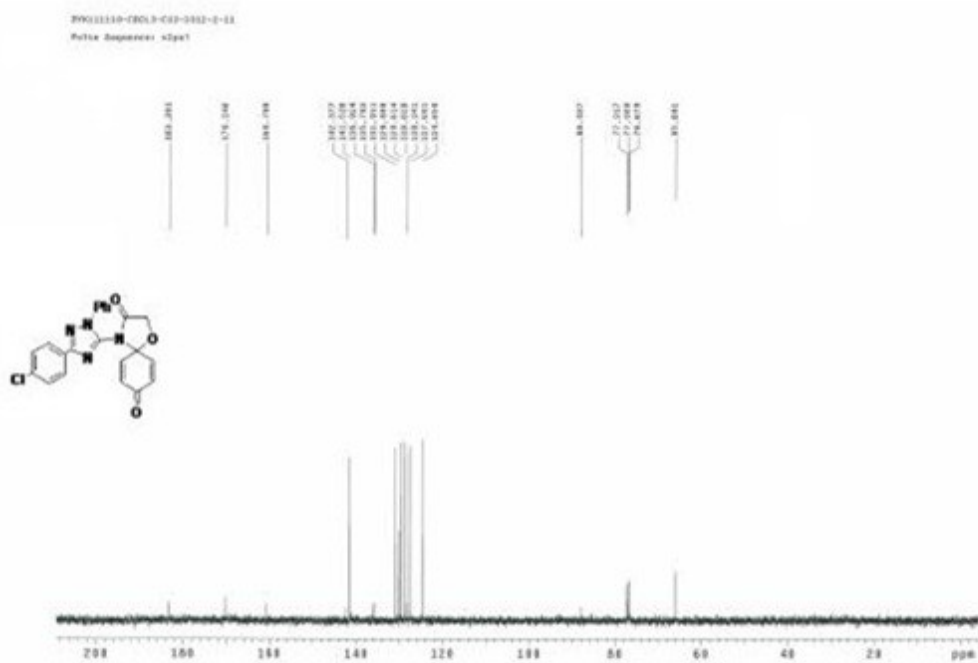

### <sup>1</sup>H-NMR (CDCl<sub>3</sub>) and <sup>13</sup>C-NMR (CDCl<sub>3</sub>) of compound 1h.

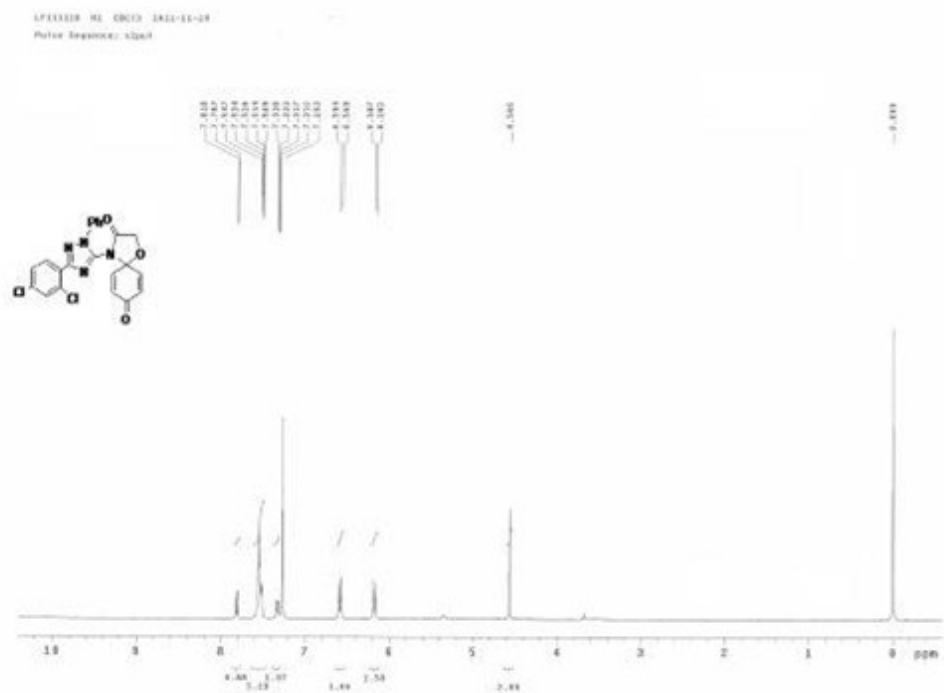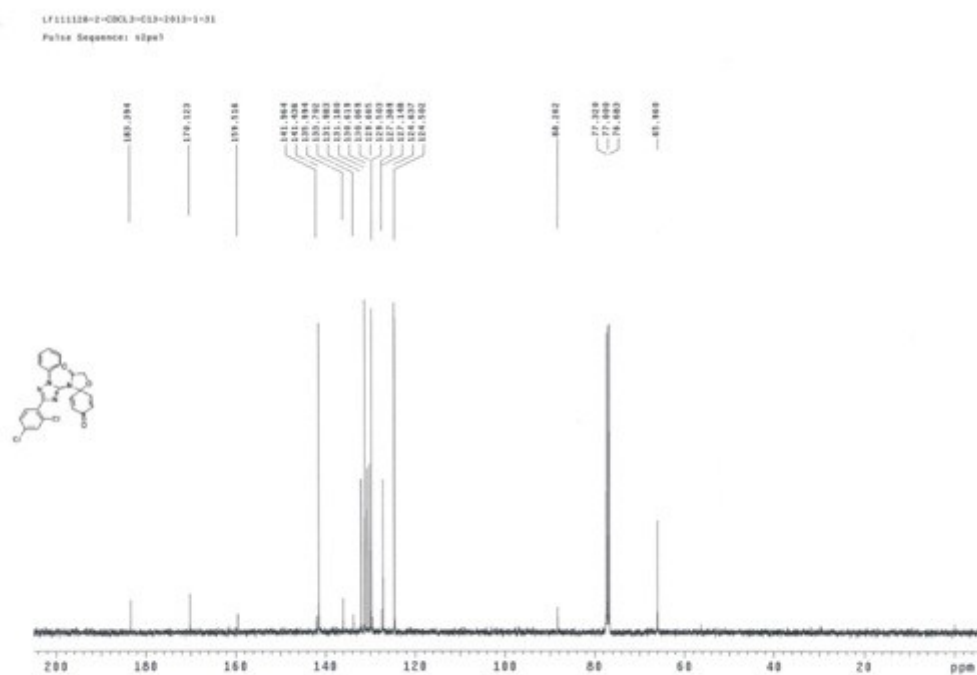

**$^1\text{H-NMR}$  ( $\text{CDCl}_3$ ) and  $^{13}\text{C-NMR}$  ( $\text{CDCl}_3$ ) of compound 1i.**

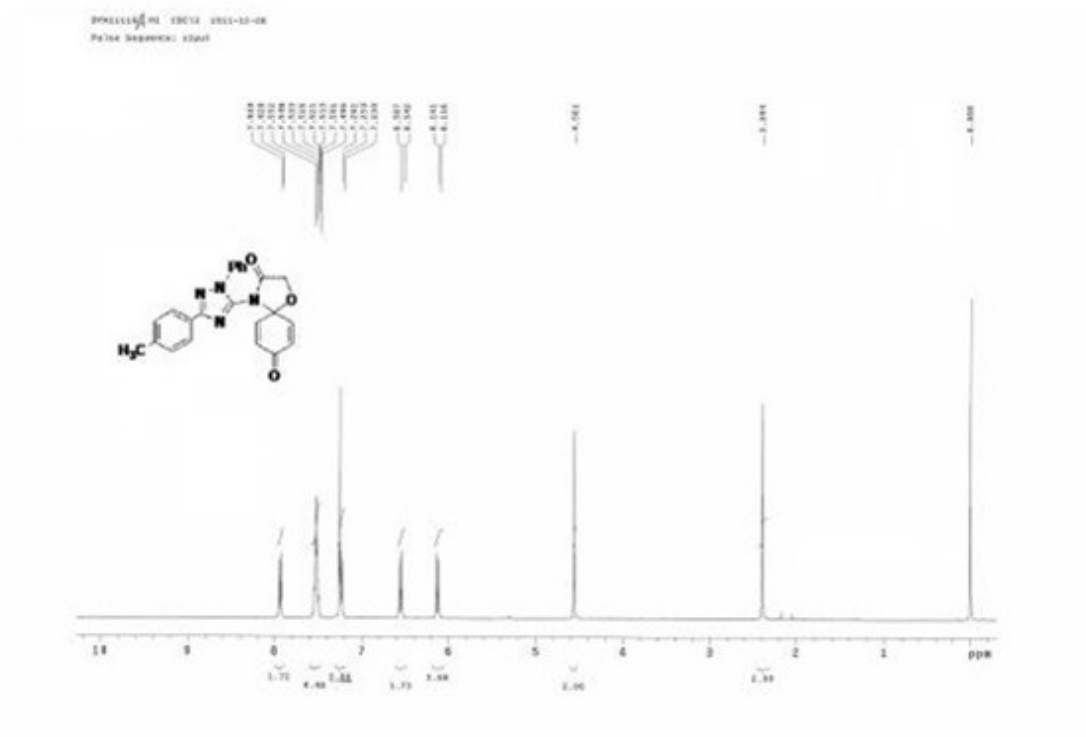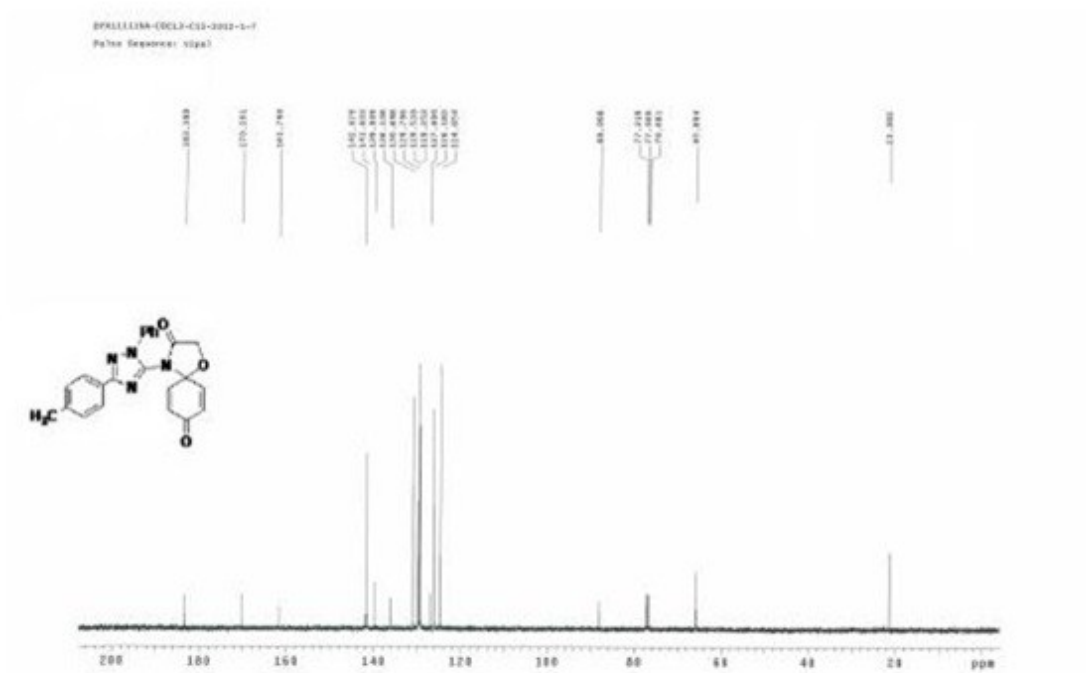

**<sup>1</sup>H-NMR (CDCl<sub>3</sub>) and <sup>13</sup>C-NMR (CDCl<sub>3</sub>) of compound 1j.**

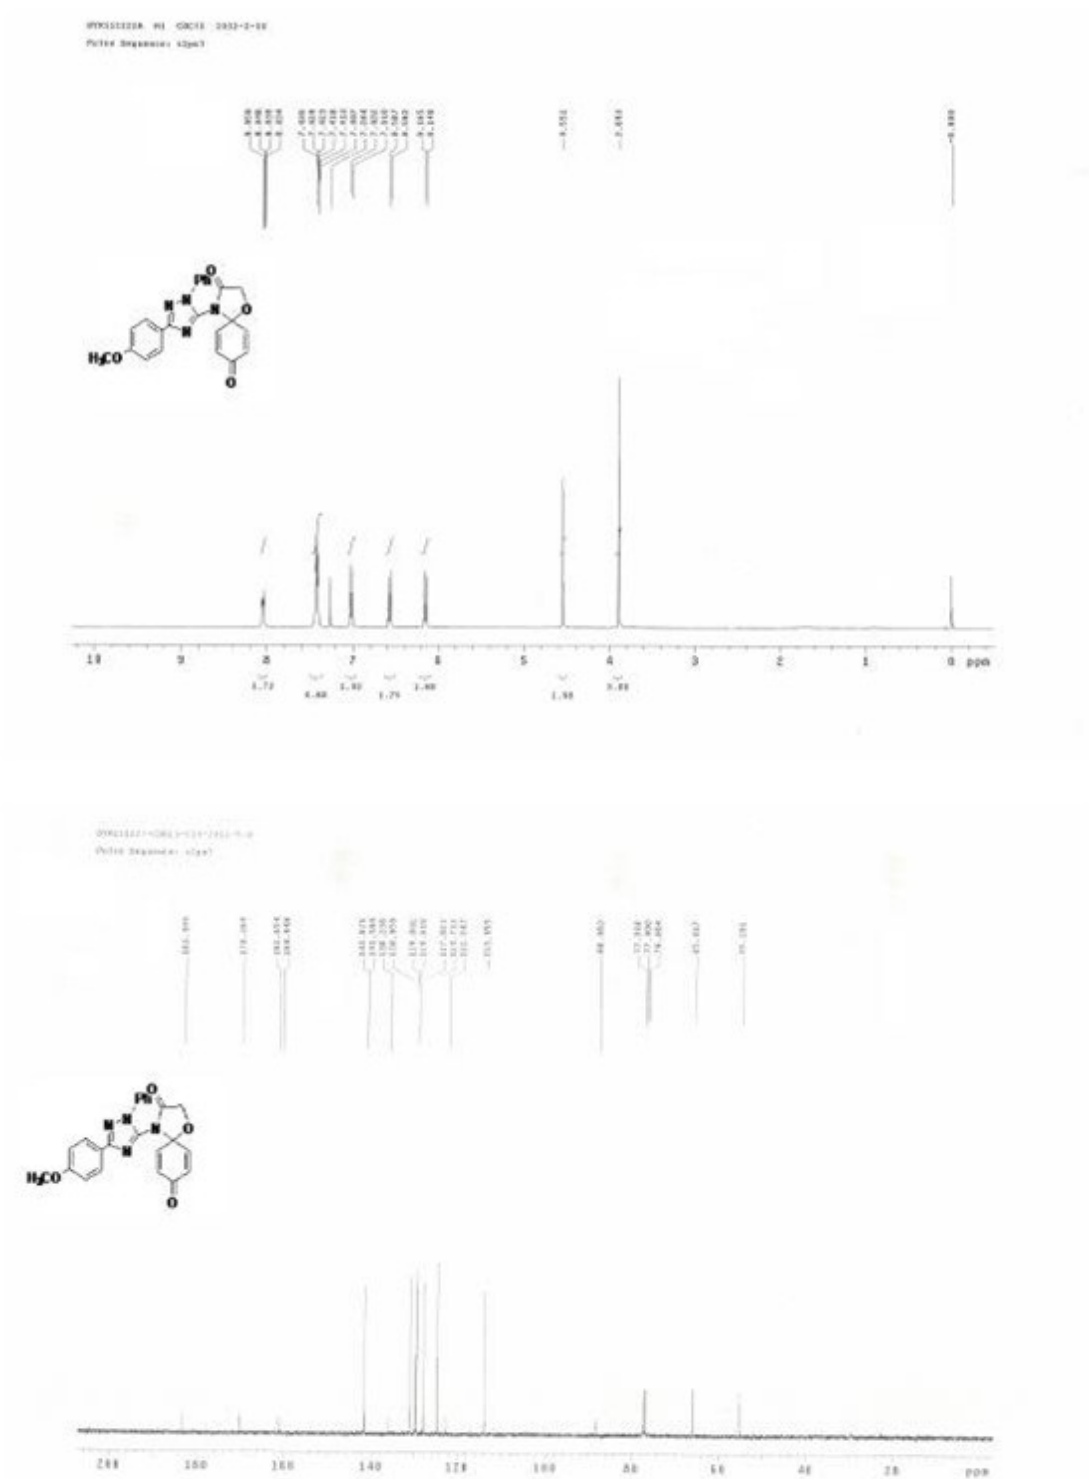

**<sup>1</sup>H-NMR (CDCl<sub>3</sub>) and <sup>13</sup>C-NMR (CDCl<sub>3</sub>) of compound 1k.**

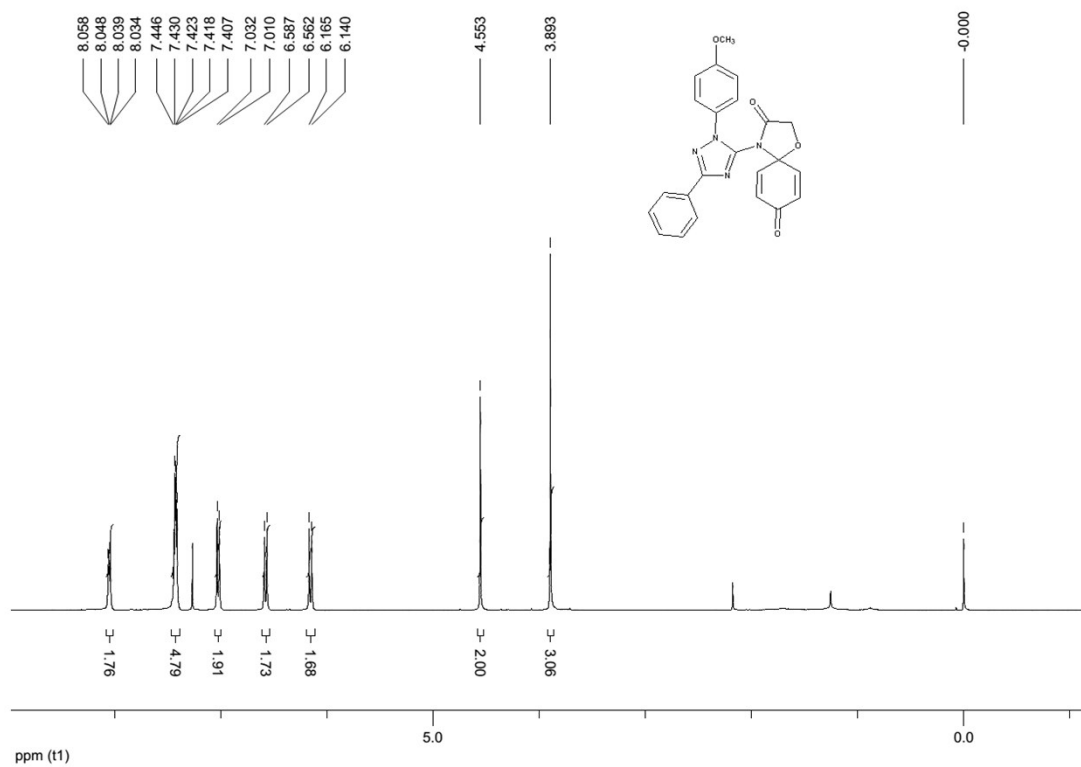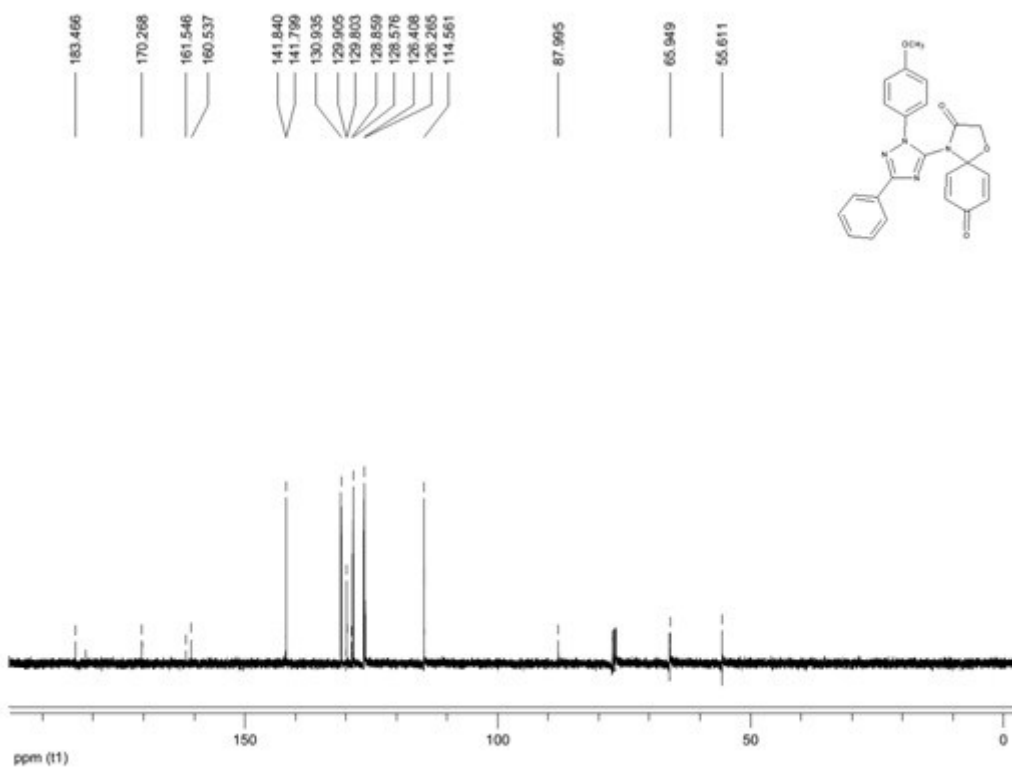



### <sup>1</sup>H-NMR (CDCl<sub>3</sub>) and <sup>13</sup>C-NMR (CDCl<sub>3</sub>) of compound 11.

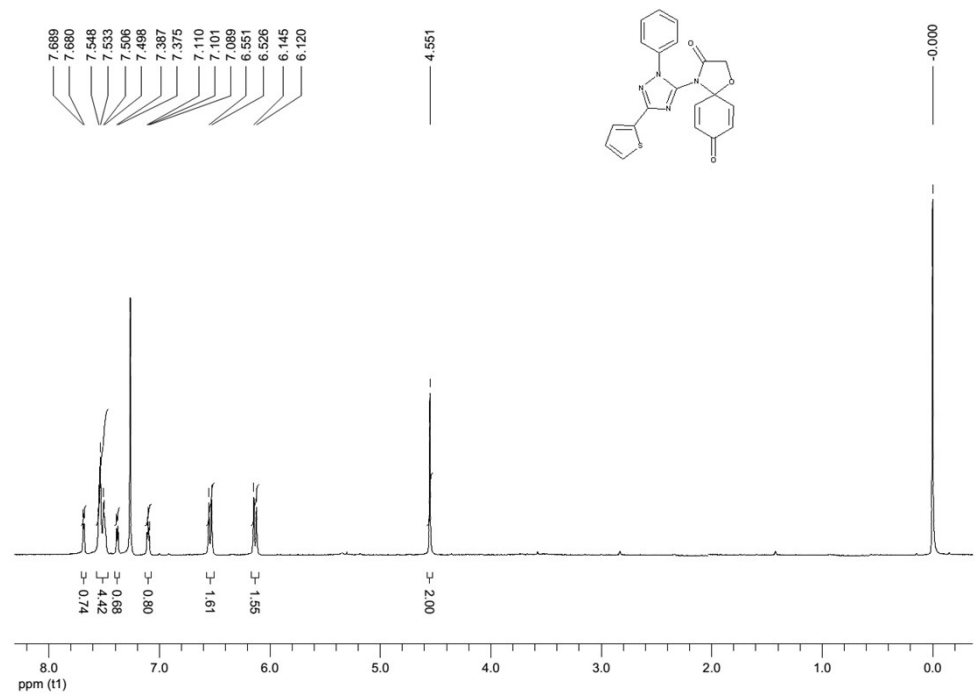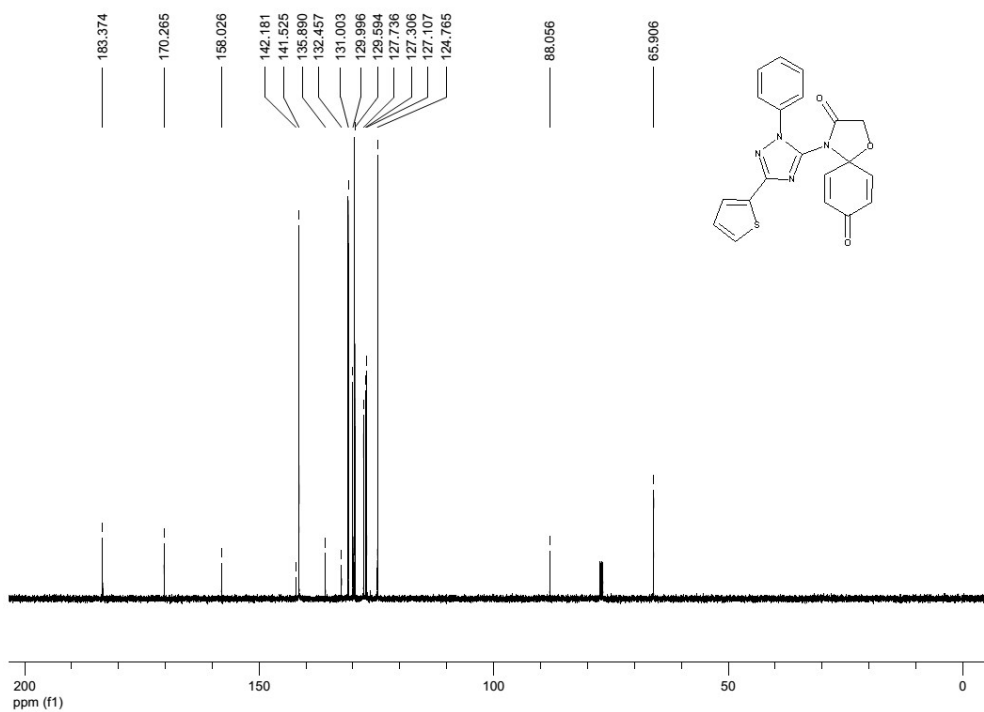

**<sup>1</sup>H-NMR (CDCl<sub>3</sub>) and <sup>13</sup>C-NMR (CDCl<sub>3</sub>) of compound 1m.**

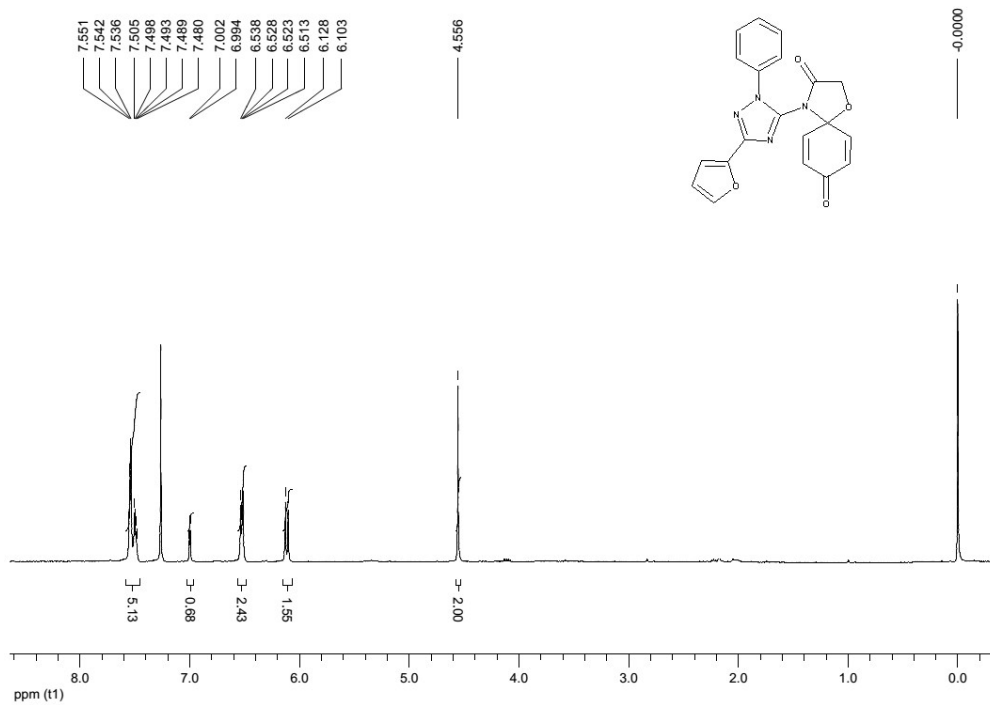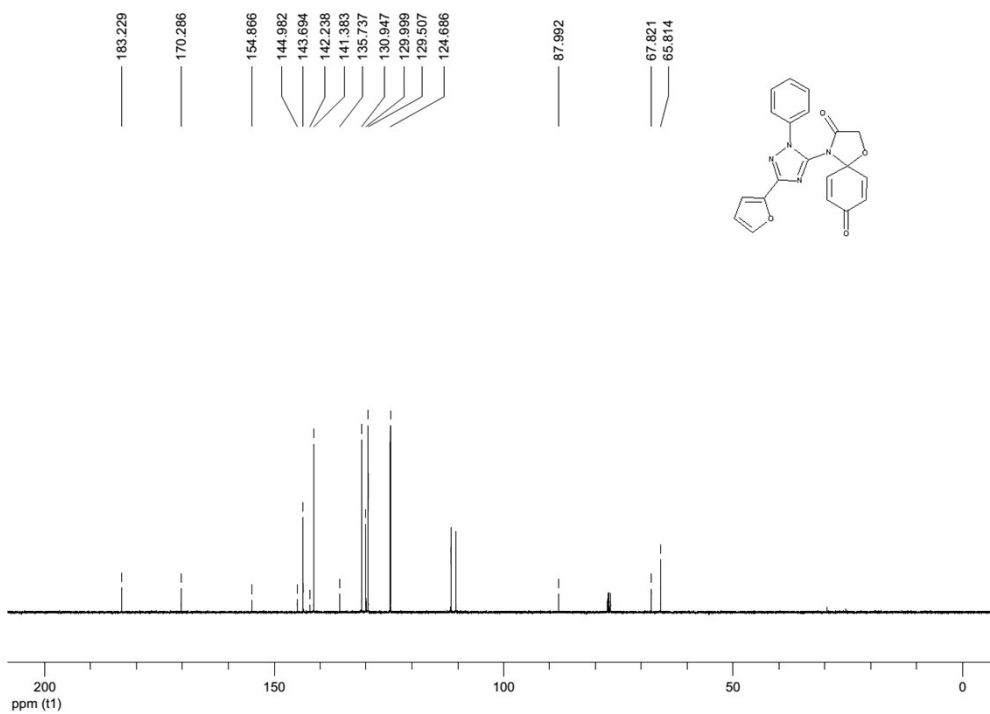

# <sup>1</sup>H-NMR (CDCl<sub>3</sub>) and <sup>13</sup>C-NMR (CDCl<sub>3</sub>) of compound 1n.

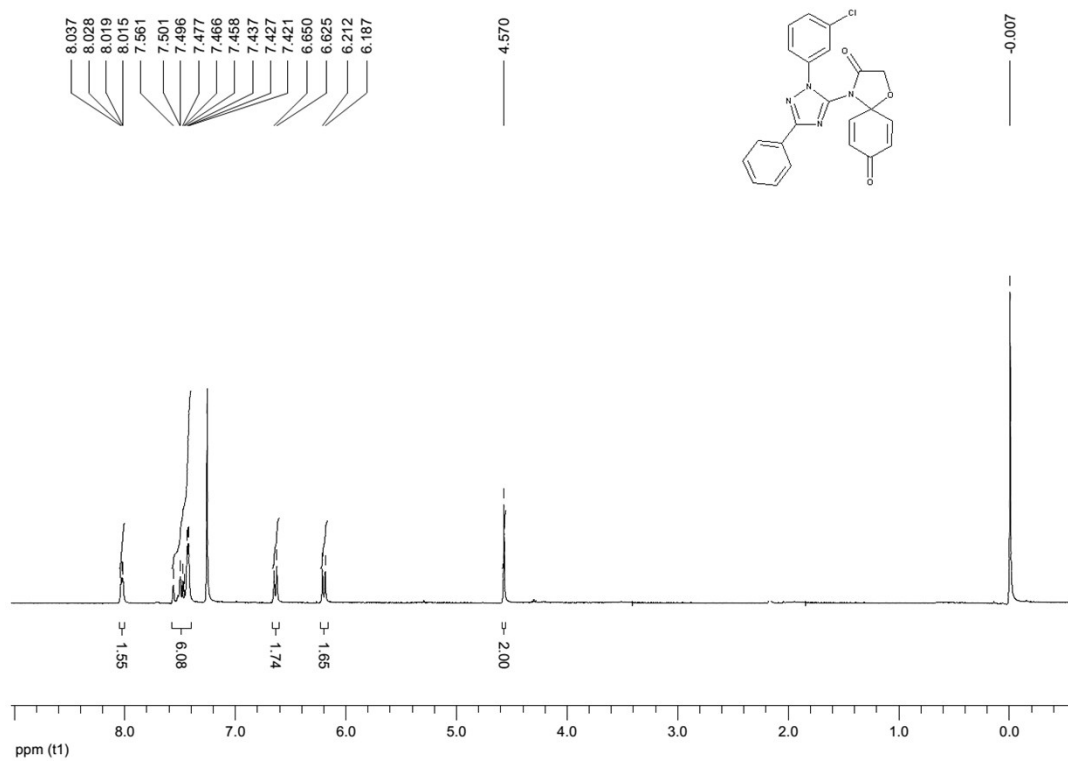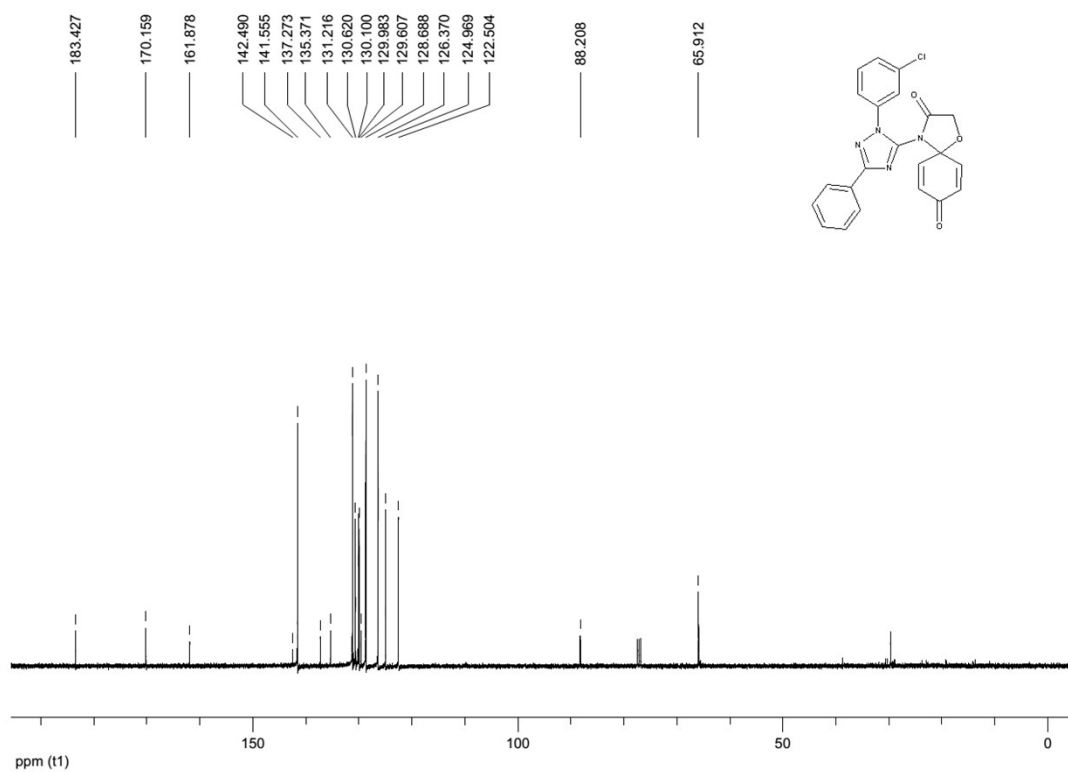

**<sup>1</sup>H-NMR (CDCl<sub>3</sub>) and <sup>13</sup>C-NMR (CDCl<sub>3</sub>) of compound 1o.**

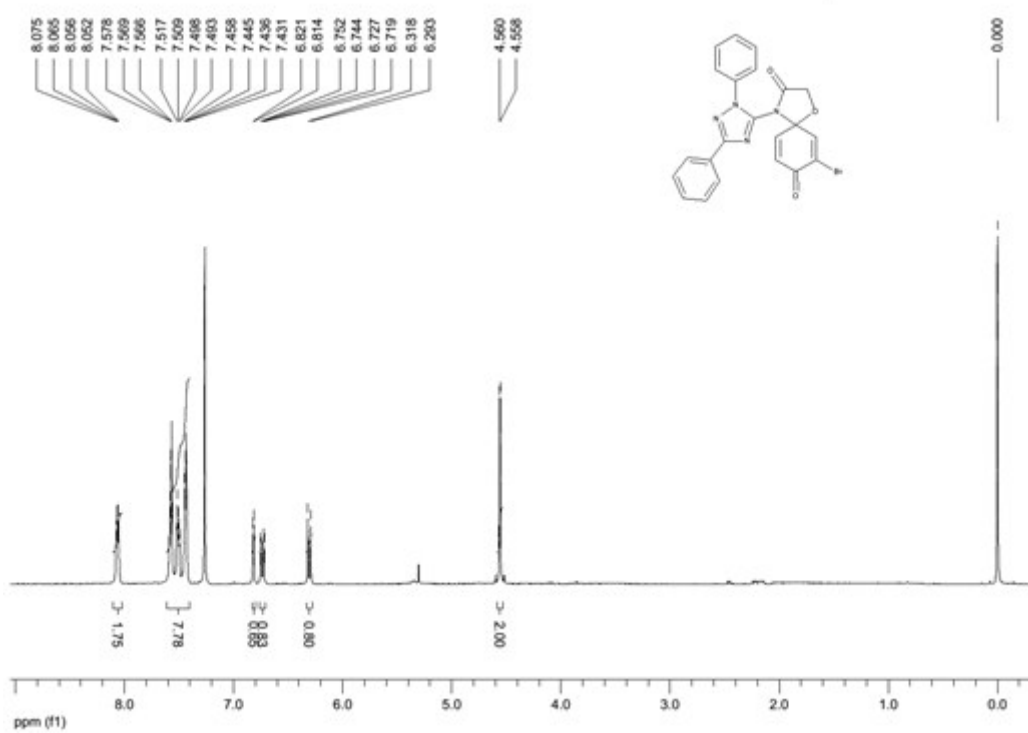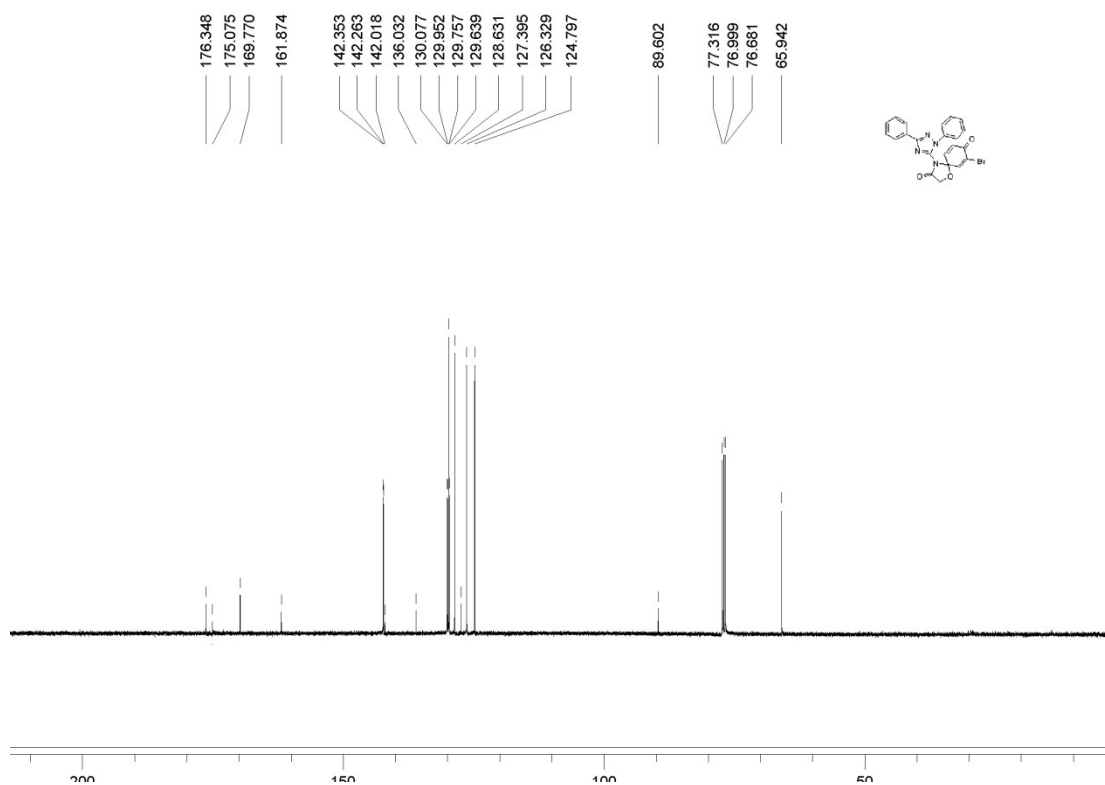

# <sup>1</sup>H-NMR (CDCl<sub>3</sub>) and <sup>13</sup>C-NMR (CDCl<sub>3</sub>) of compound 1P.

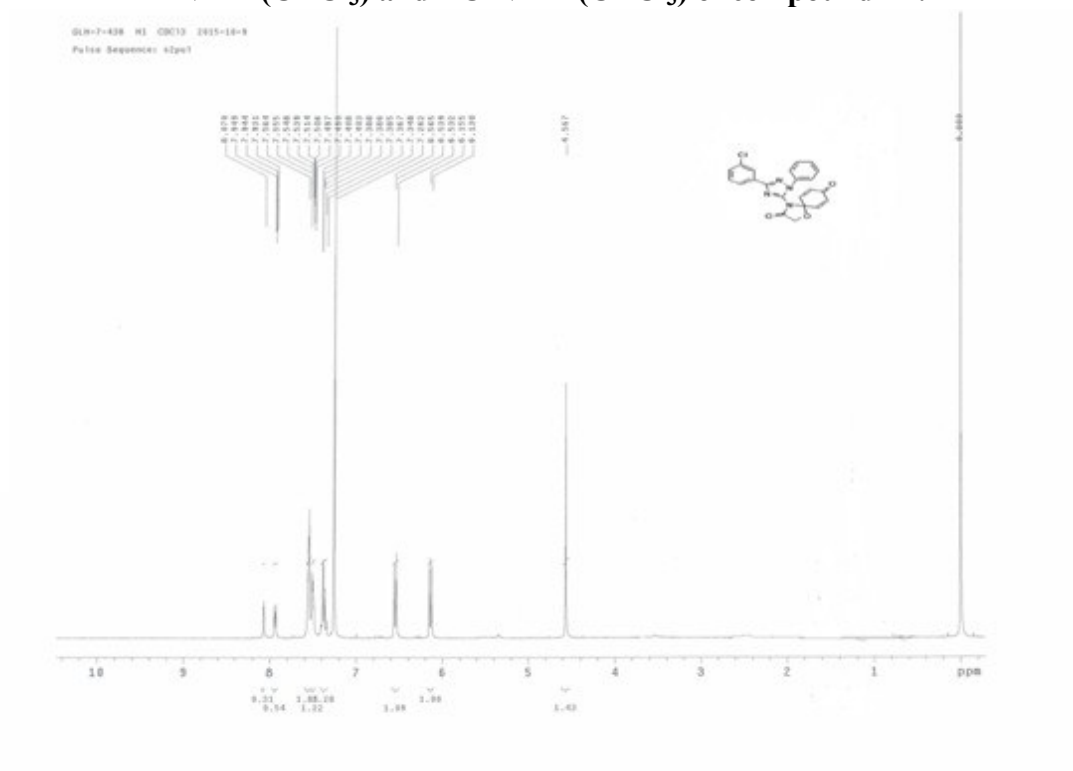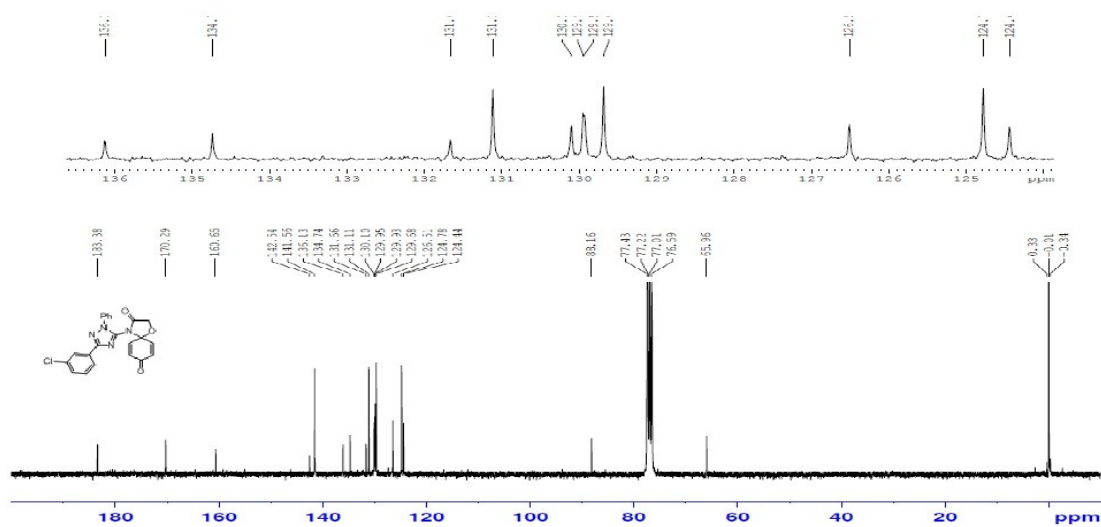

**$^1\text{H-NMR}$  ( $\text{CDCl}_3$ ) and  $^{13}\text{C-NMR}$  ( $\text{CDCl}_3$ ) of compound 2a.**

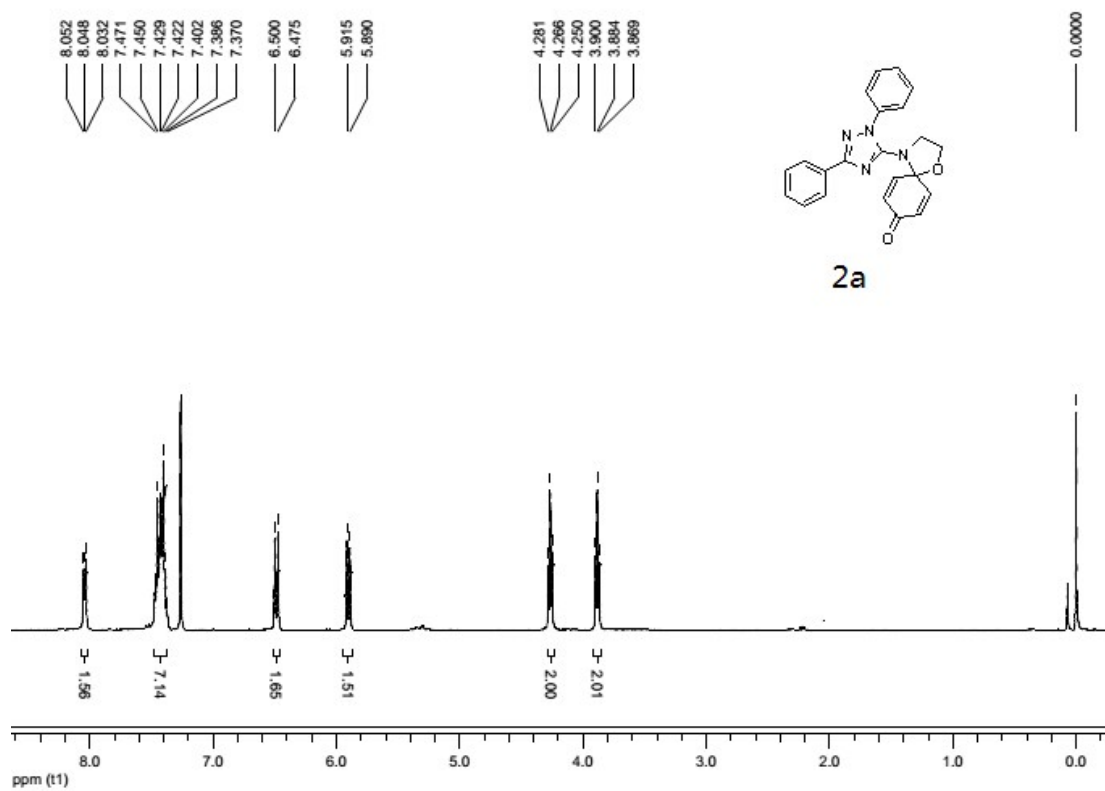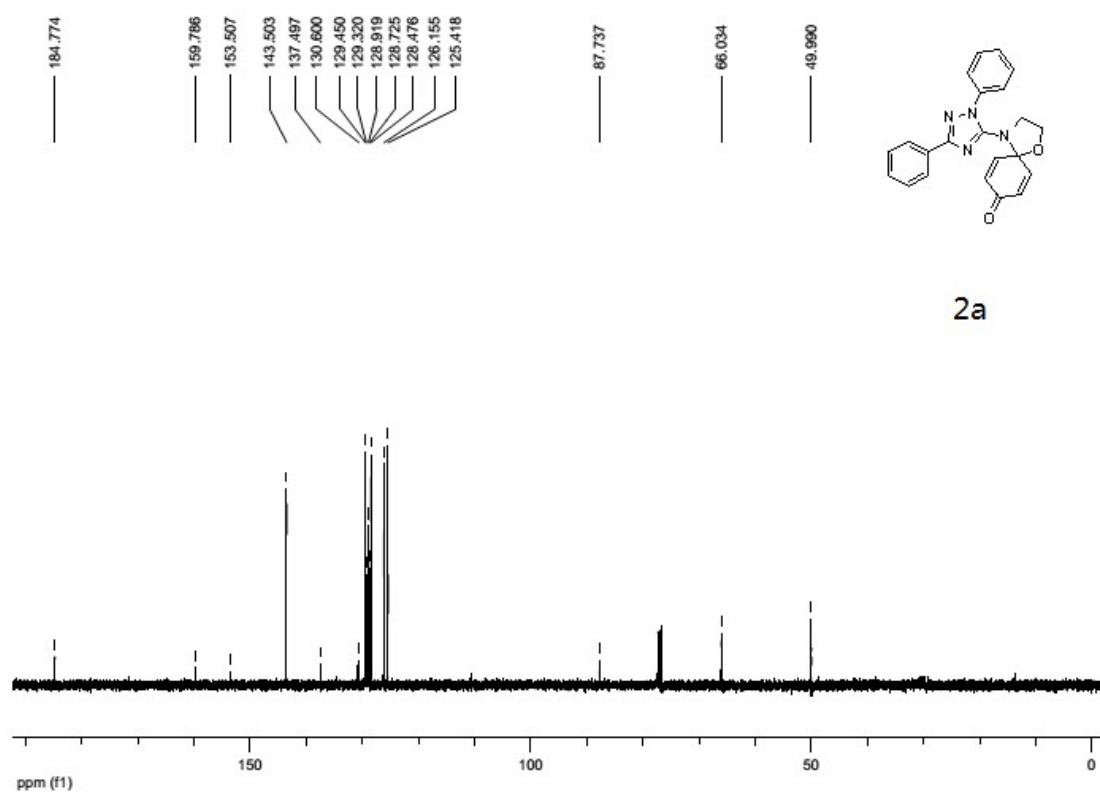

**<sup>1</sup>H-NMR (CDCl<sub>3</sub>) and <sup>13</sup>C-NMR (CDCl<sub>3</sub>) of compound 2b.**

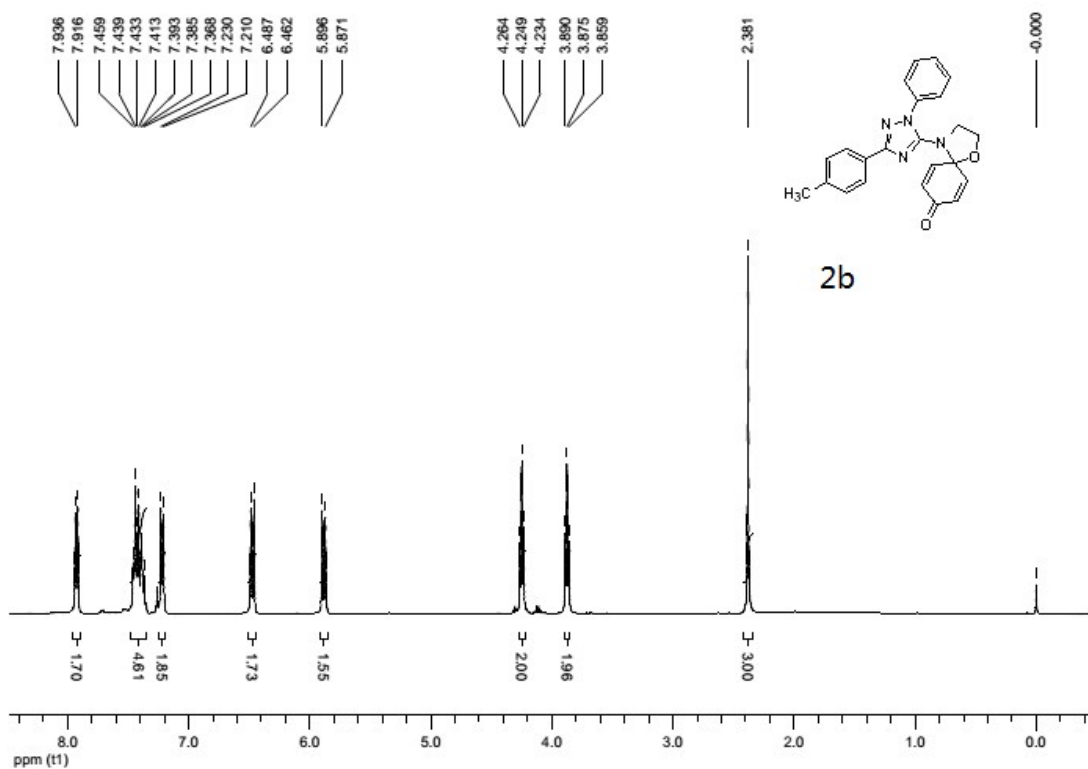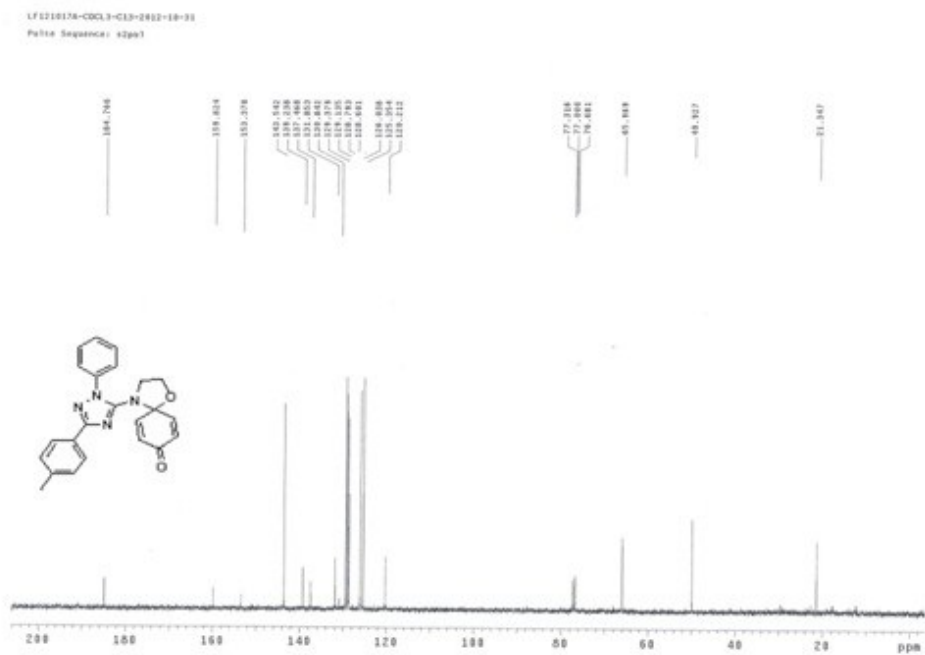

**$^1\text{H-NMR}$  ( $\text{CDCl}_3$ ) and  $^{13}\text{C-NMR}$  ( $\text{CDCl}_3$ ) of compound 2c.**

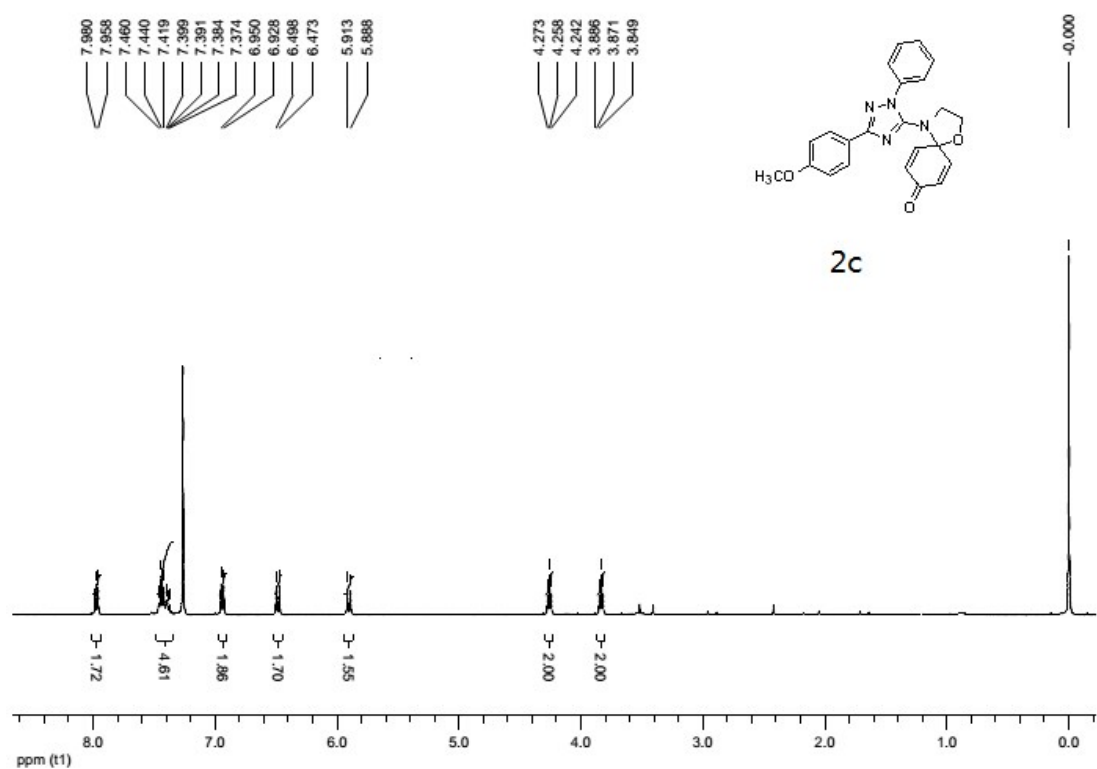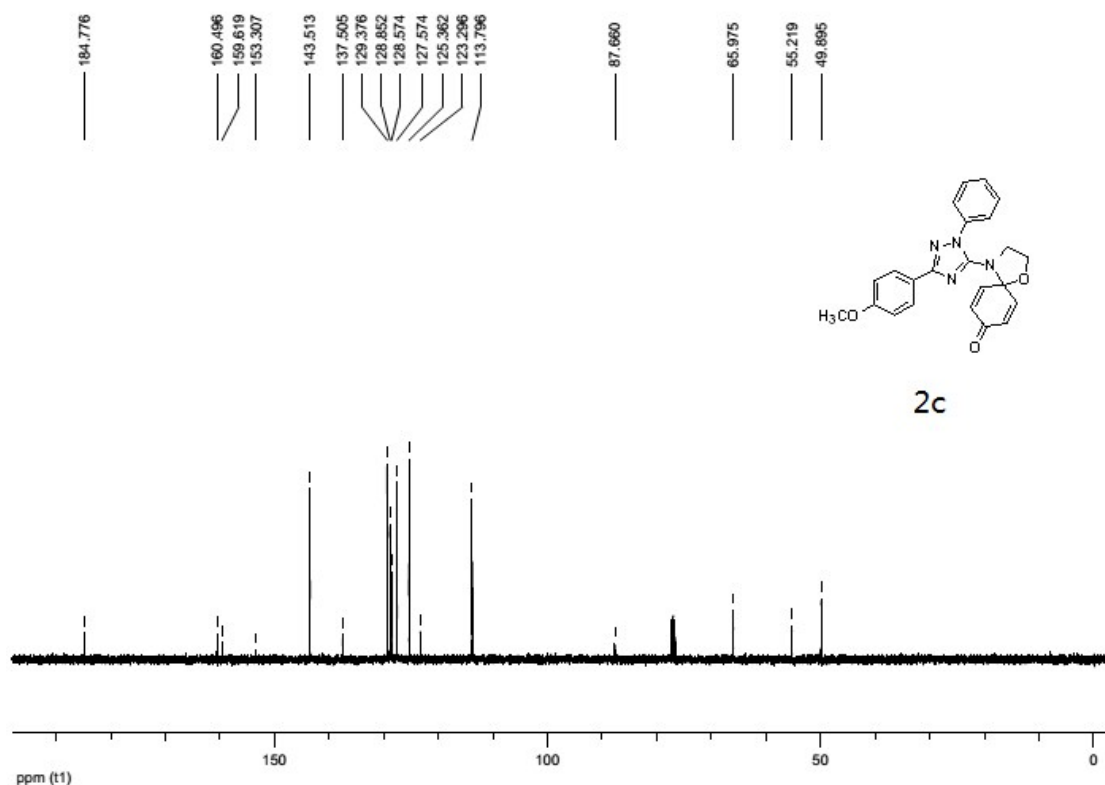



**<sup>1</sup>H-NMR (CDCl<sub>3</sub>) and <sup>13</sup>C-NMR (CDCl<sub>3</sub>) of compound 2d.**

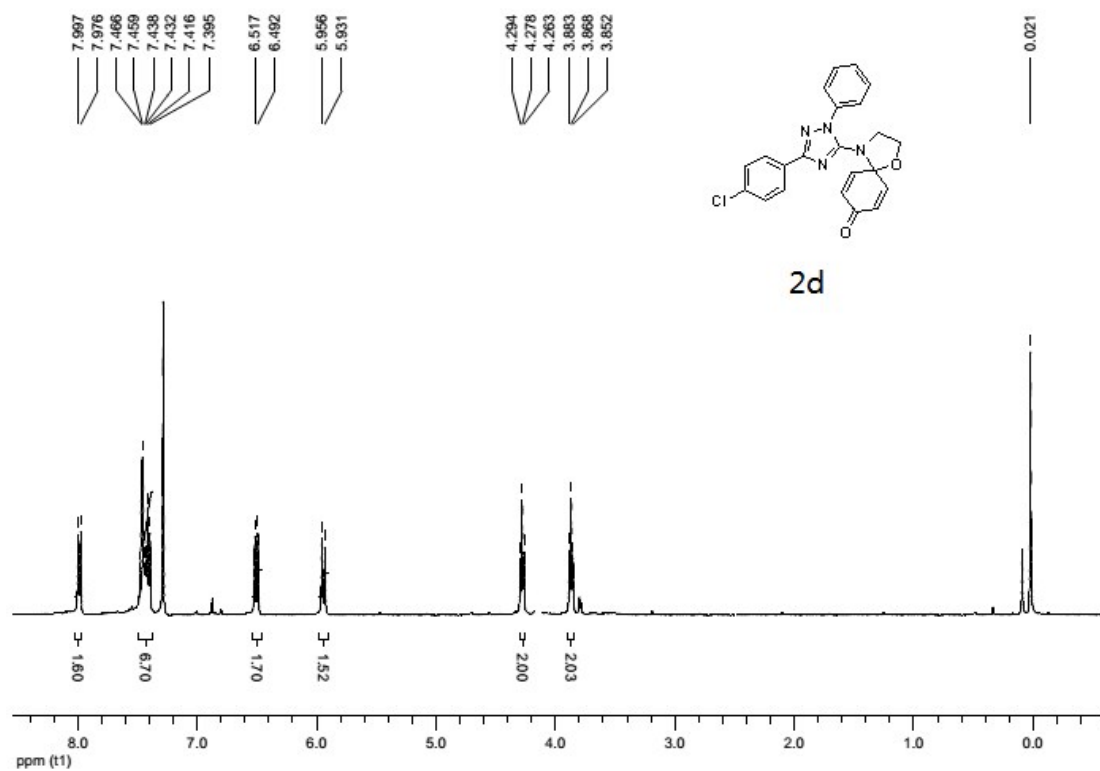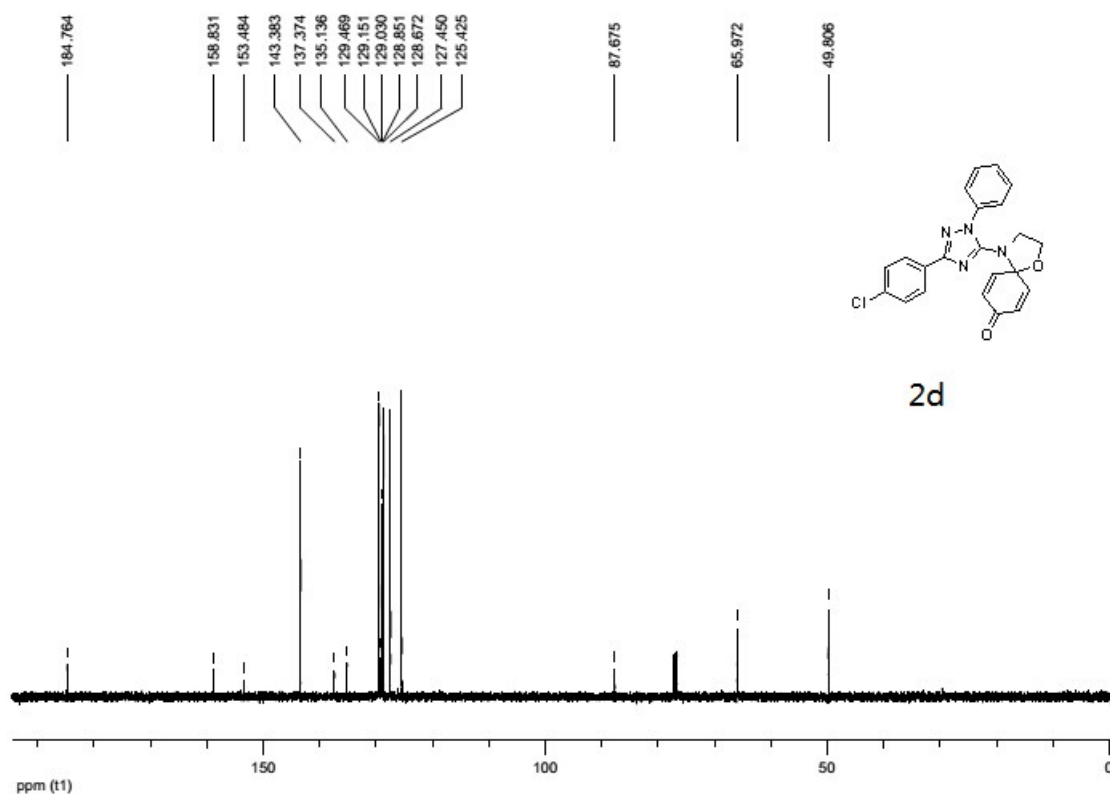

**<sup>1</sup>H-NMR (CDCl<sub>3</sub>) and <sup>13</sup>C-NMR (CDCl<sub>3</sub>) of compound 2e.**

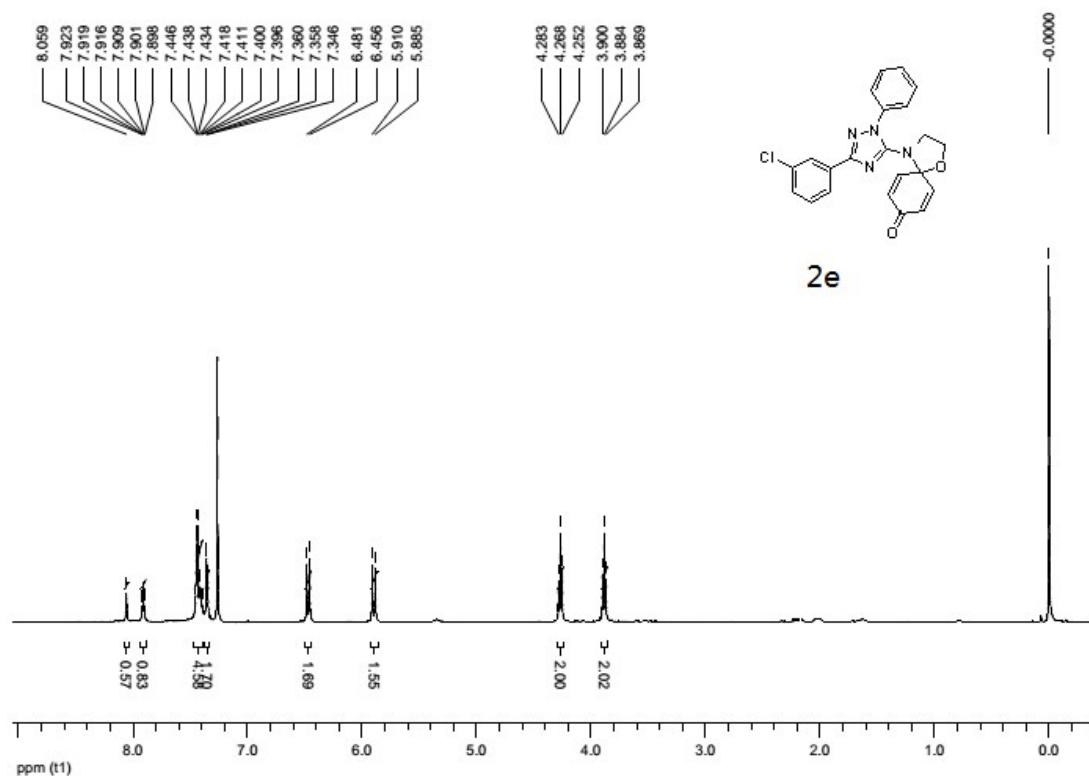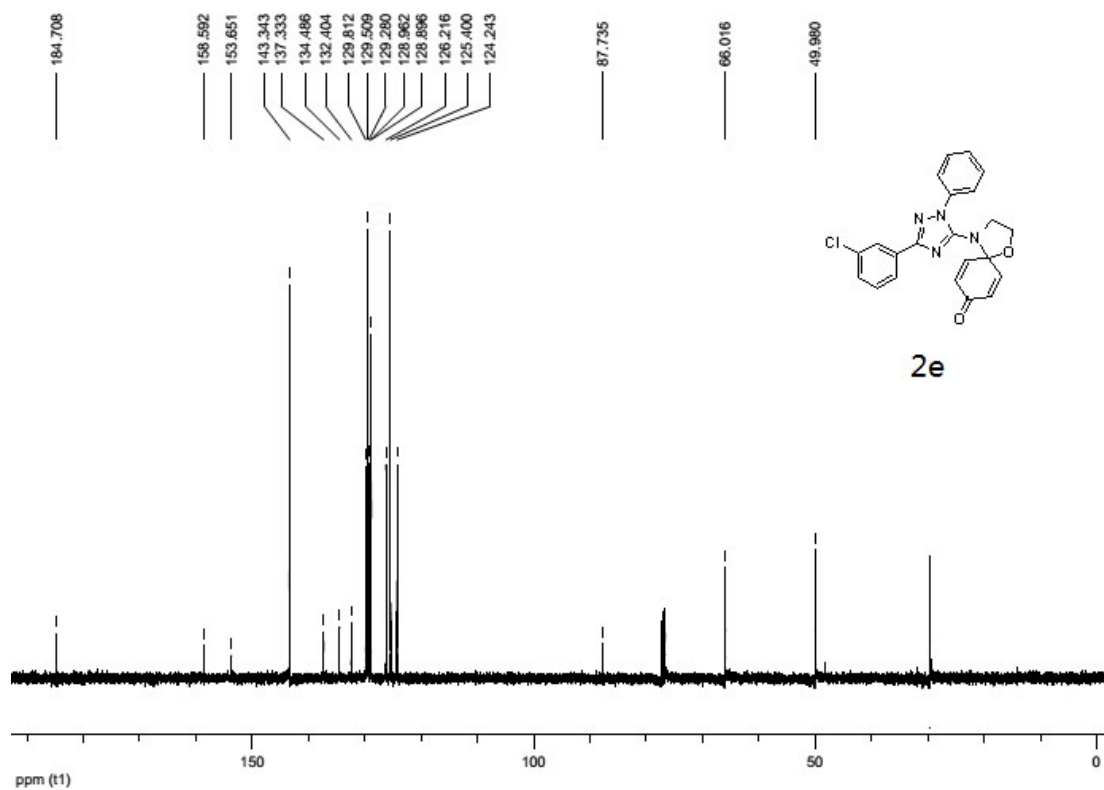

**<sup>1</sup>H-NMR (CDCl<sub>3</sub>) and <sup>13</sup>C-NMR (CDCl<sub>3</sub>) of compound 2f.**

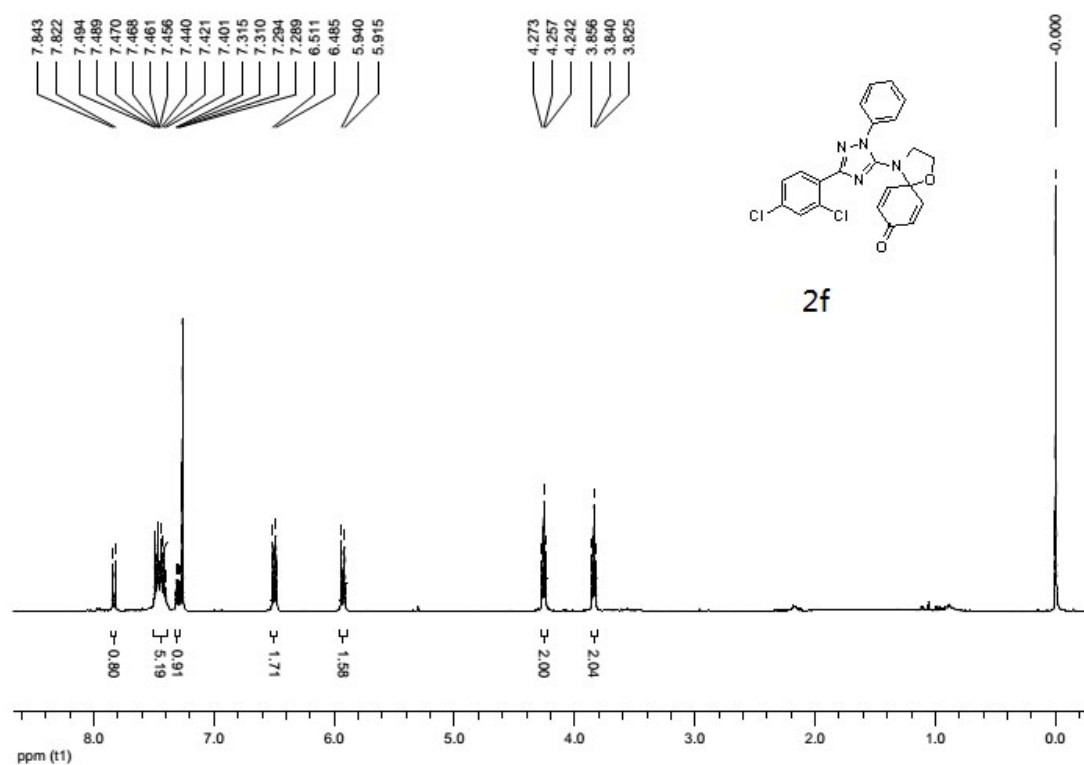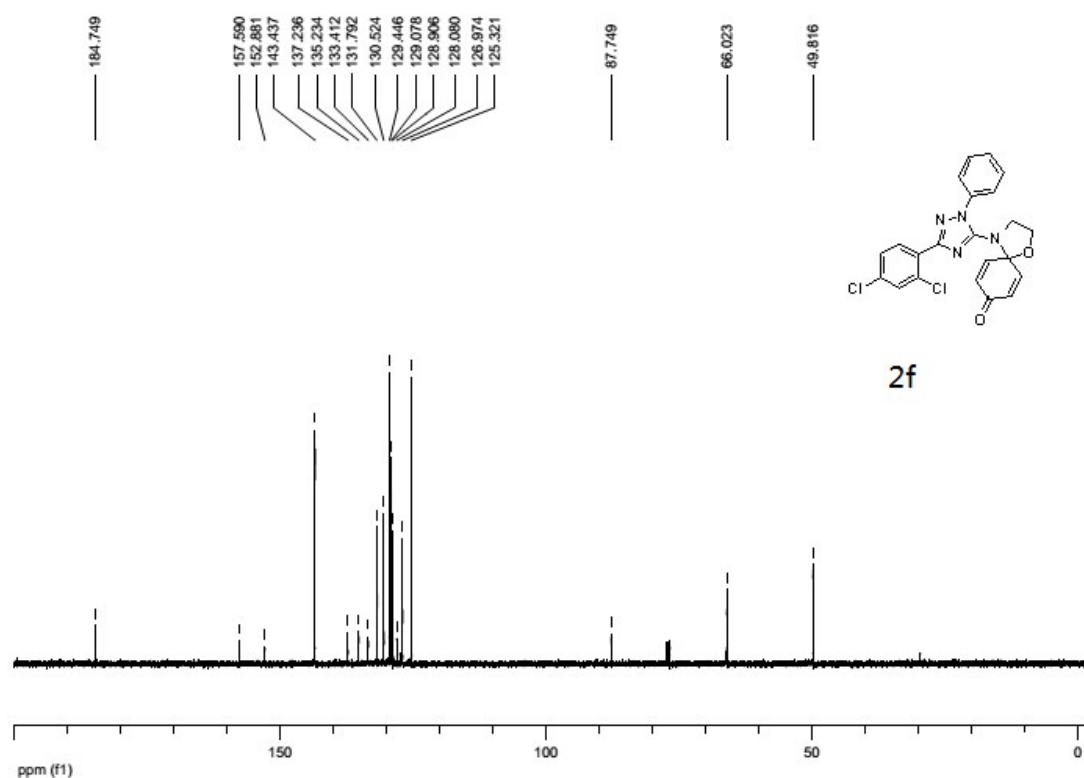

**<sup>1</sup>H-NMR (CDCl<sub>3</sub>) and <sup>13</sup>C-NMR (CDCl<sub>3</sub>) of compound 2g.**

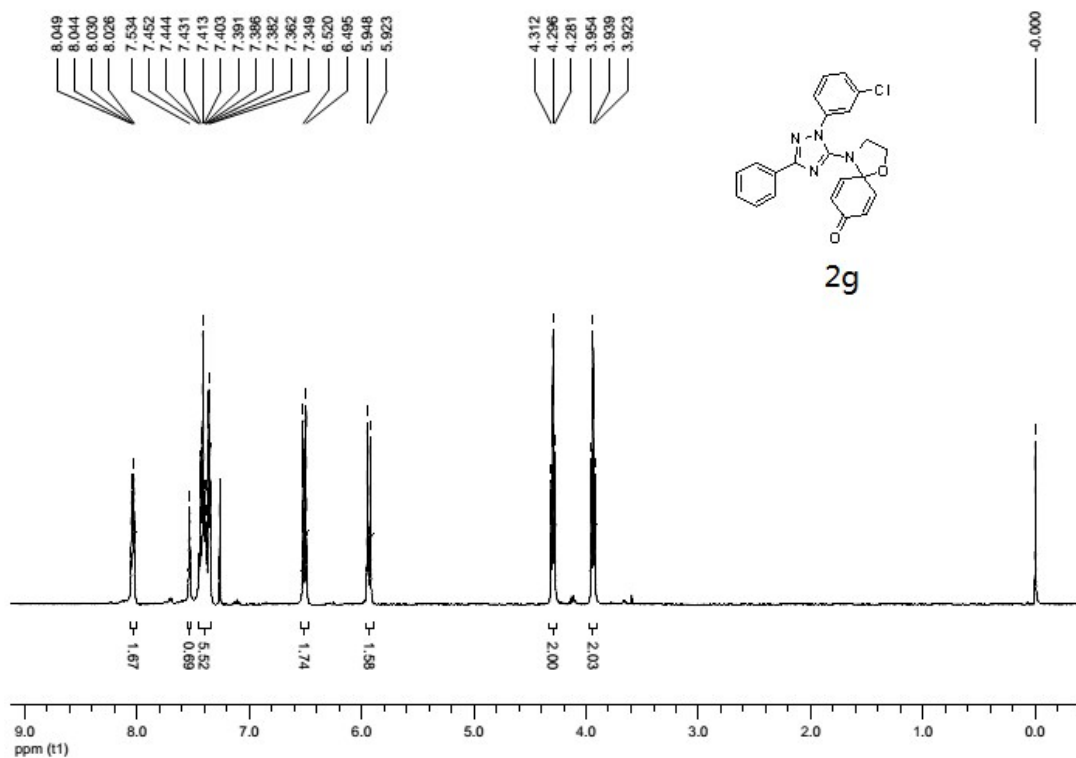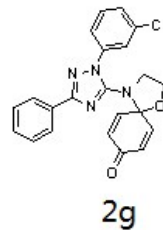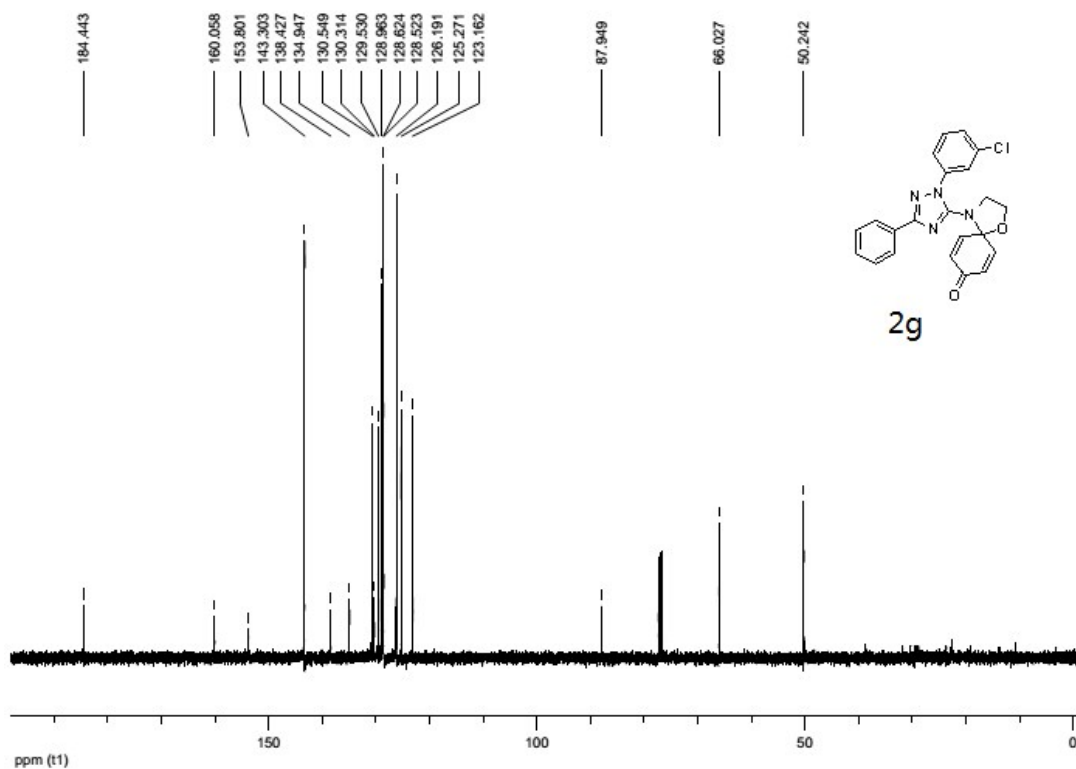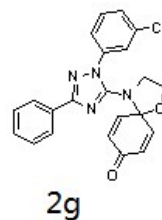

**<sup>1</sup>H-NMR (CDCl<sub>3</sub>) and <sup>13</sup>C-NMR (CDCl<sub>3</sub>) of compound 2h.**

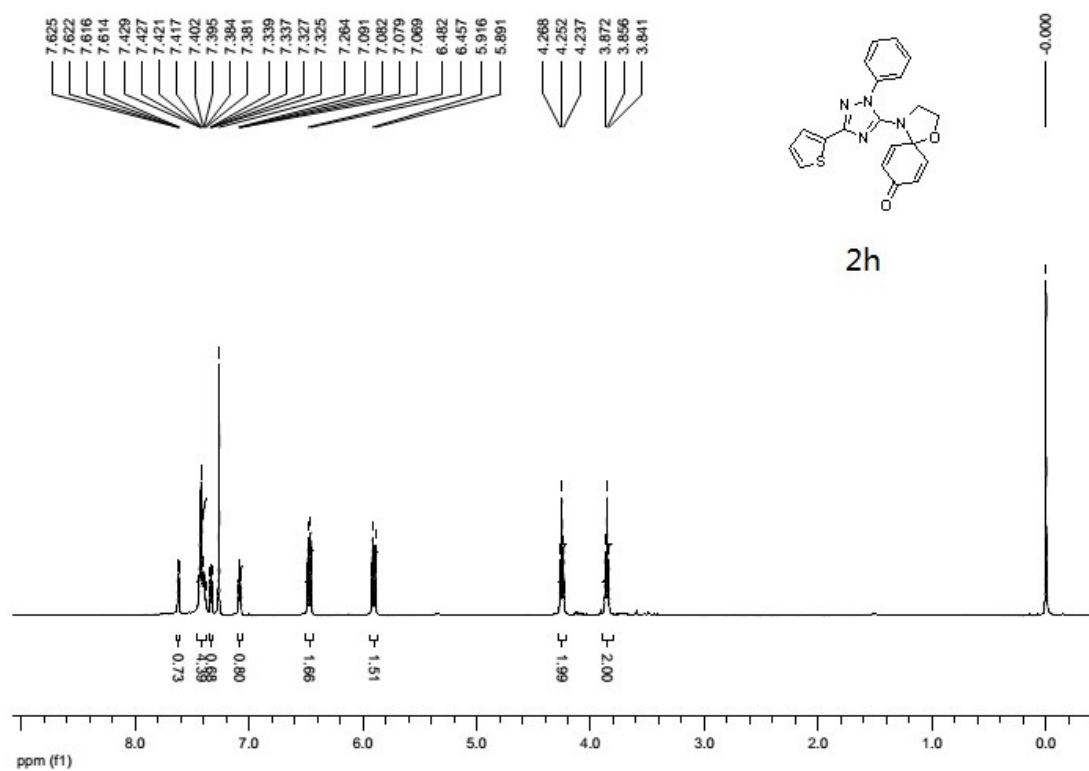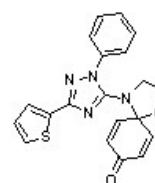

2h

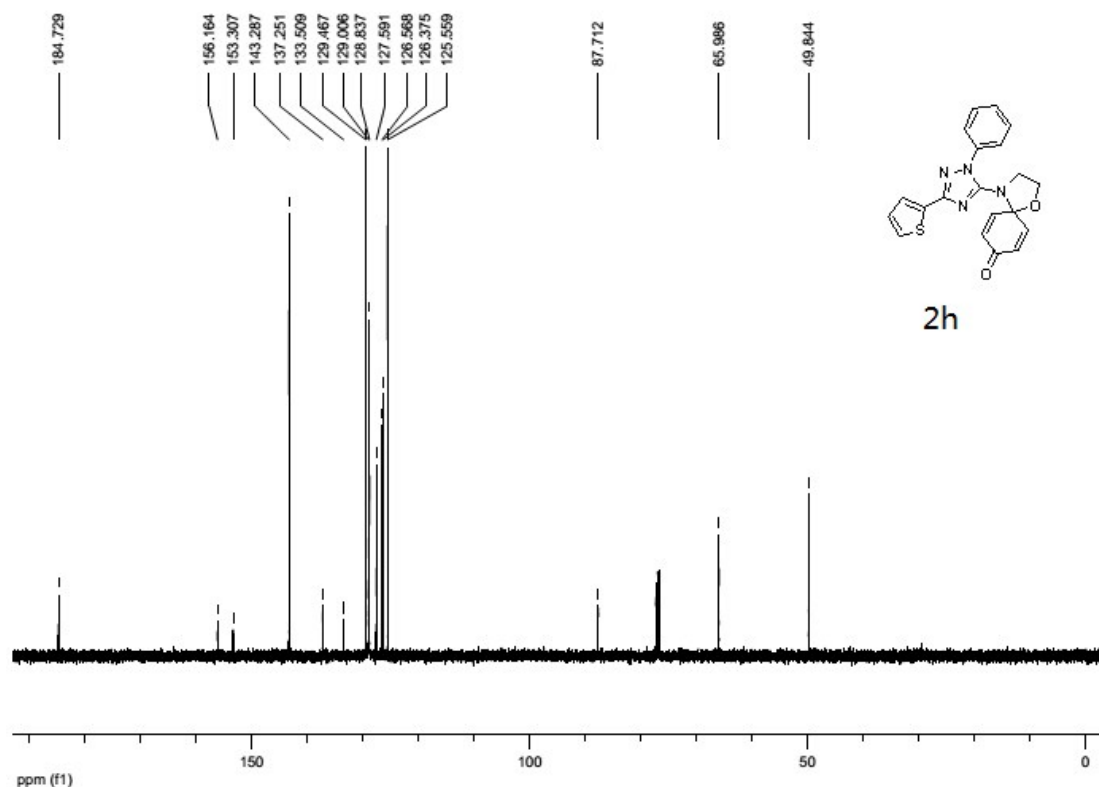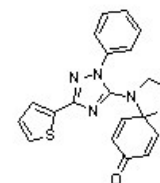

2h

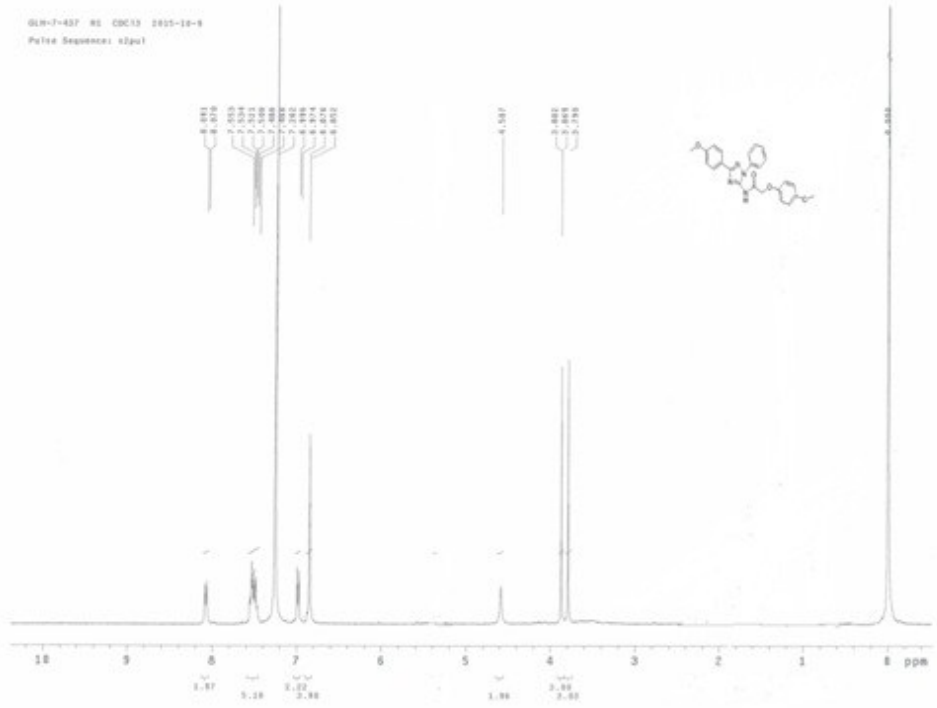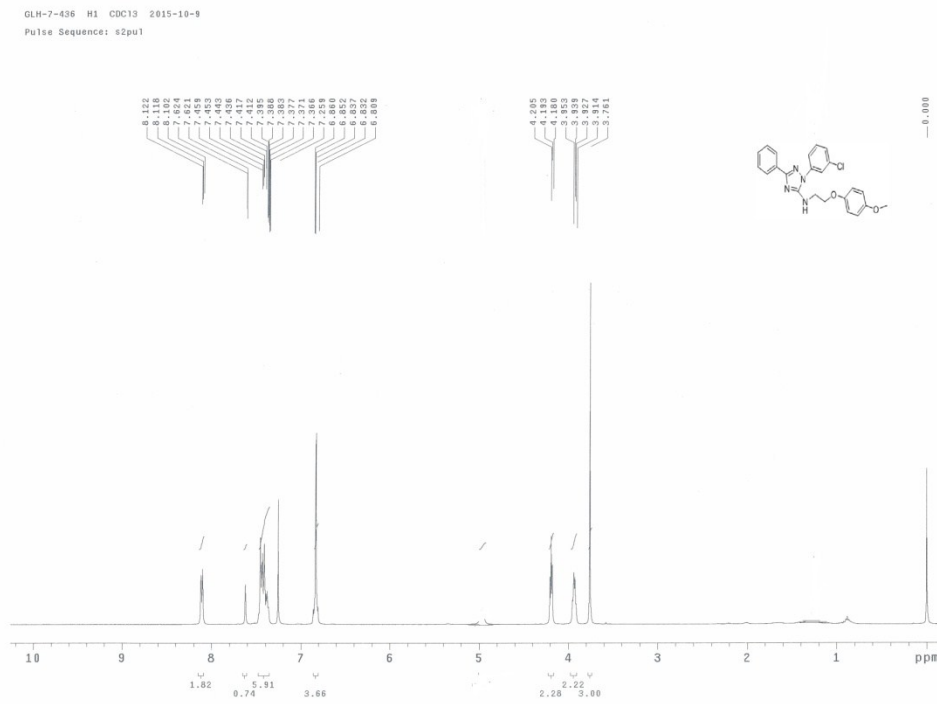

OLN-7-424 H1 CDC13 2025-10-8  
Pulse Sequence: zgpg30

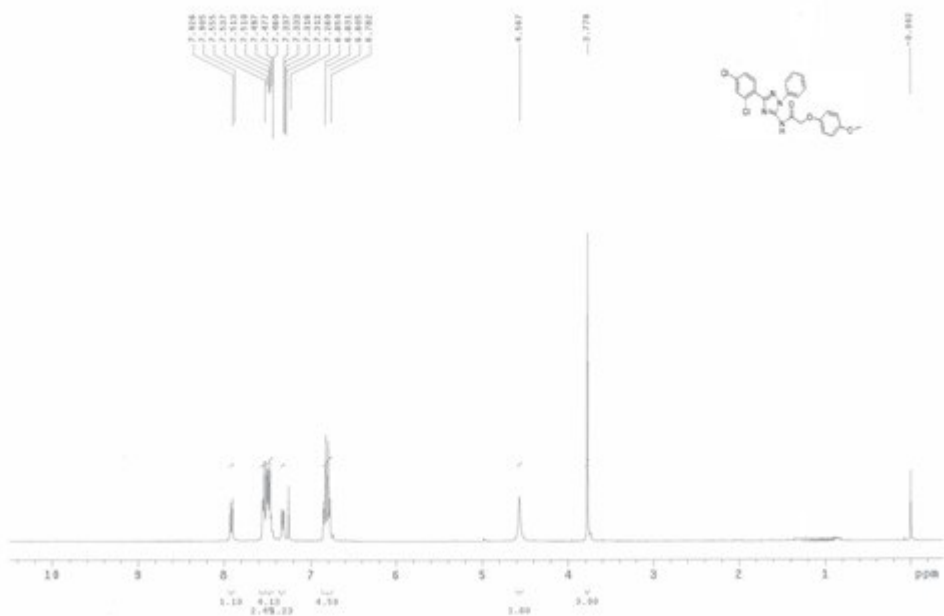

OLN-7-425 H1 CDC13 2025-10-8  
Pulse Sequence: zgpg30

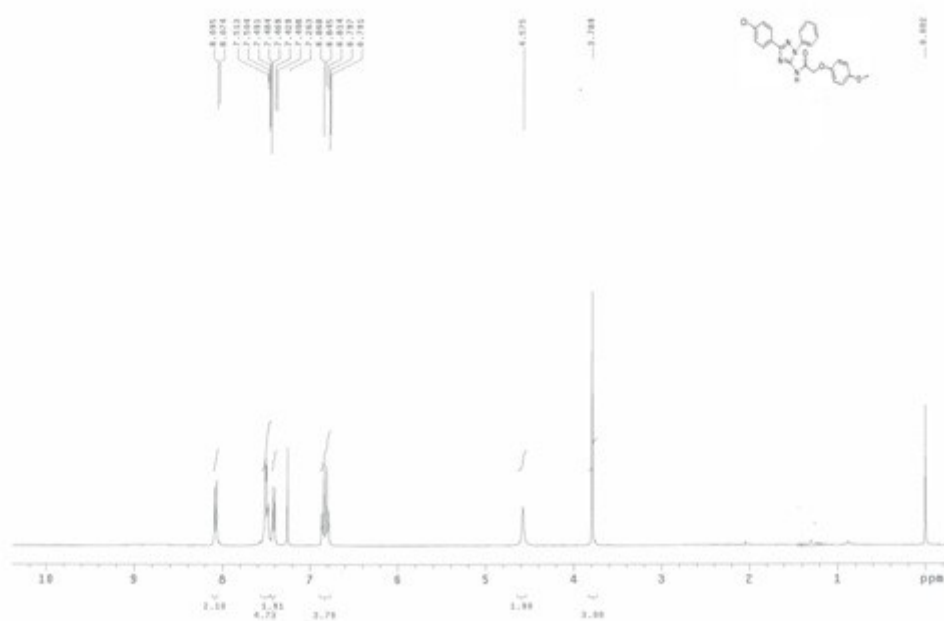

OLN-7-021 H1 CDCl3 2015-10-06  
Pulse Sequence: zgpg30

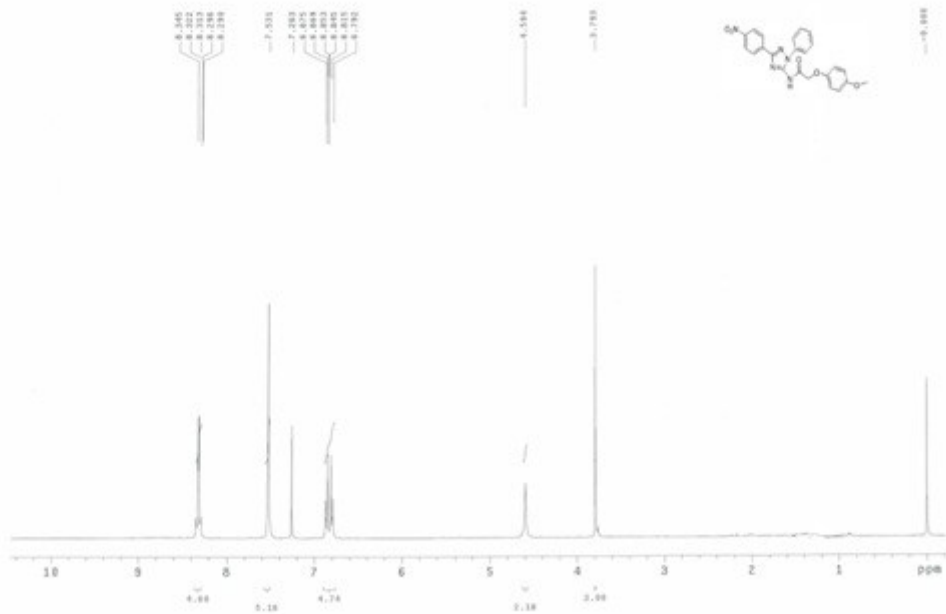

OLN-7-021 H1 CDCl3 2015-10-06  
Pulse Sequence: zgpg30

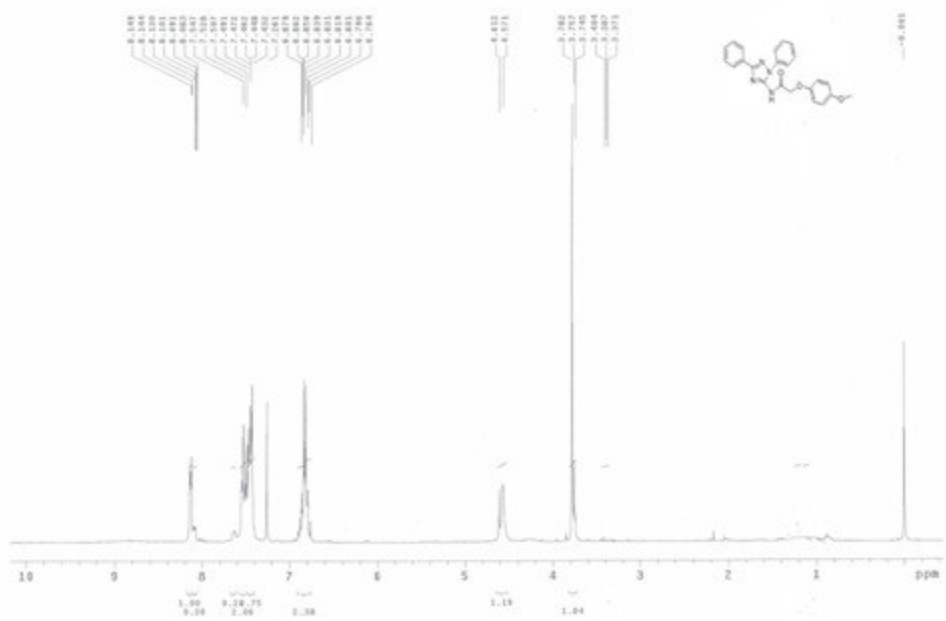



0YX18947C H1 CDCl3 2010-6-23  
Pulse Sequence: zgpg30

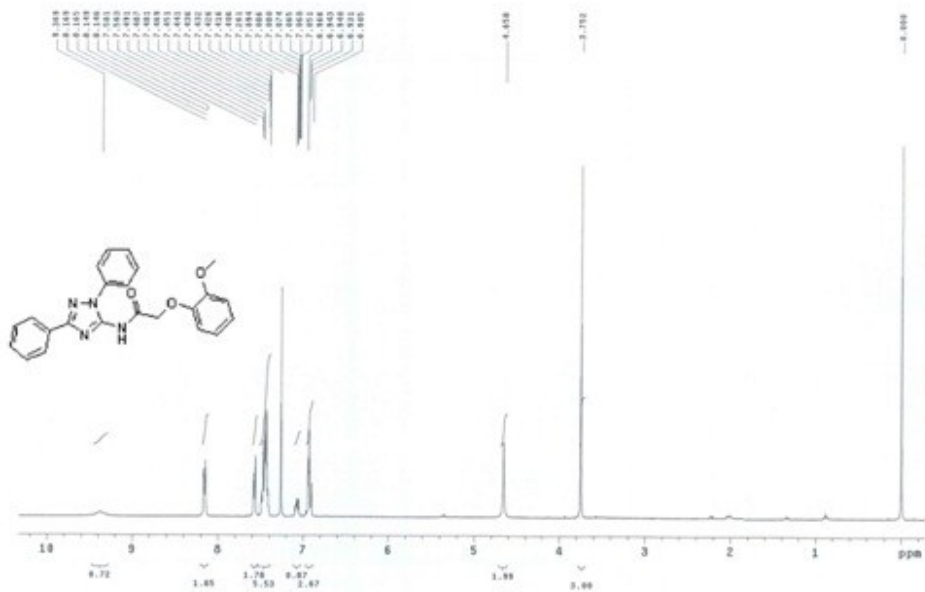

0YX18948C H1 CDCl3 2010-10-29  
Pulse Sequence: zgpg30

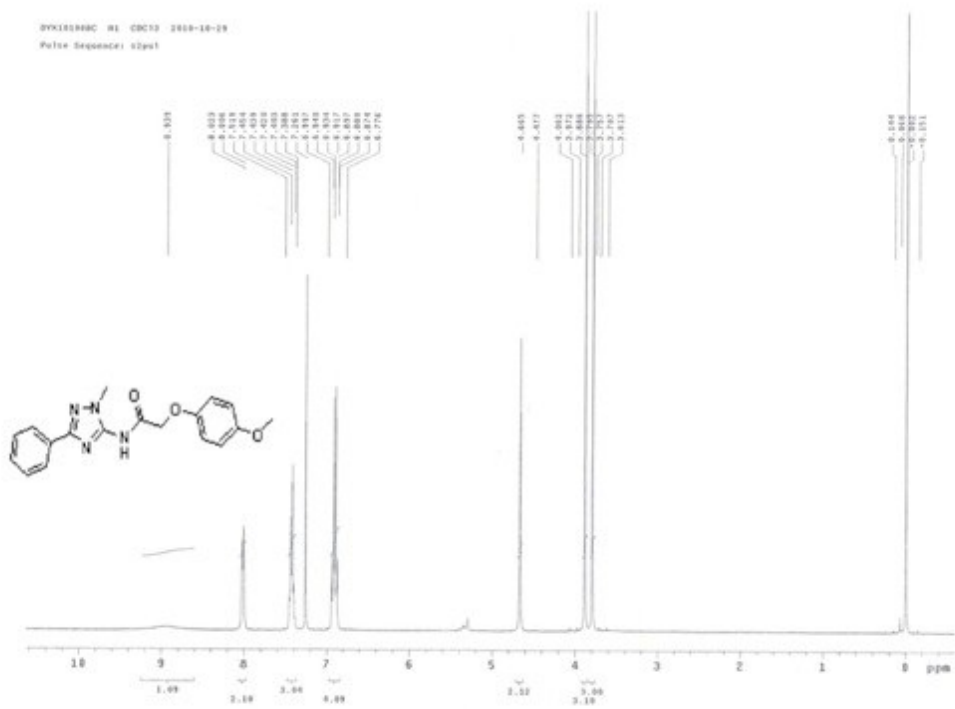

DVK10486 HI QCC13 2010-10-27  
 Pulse Sequence: zgpg1

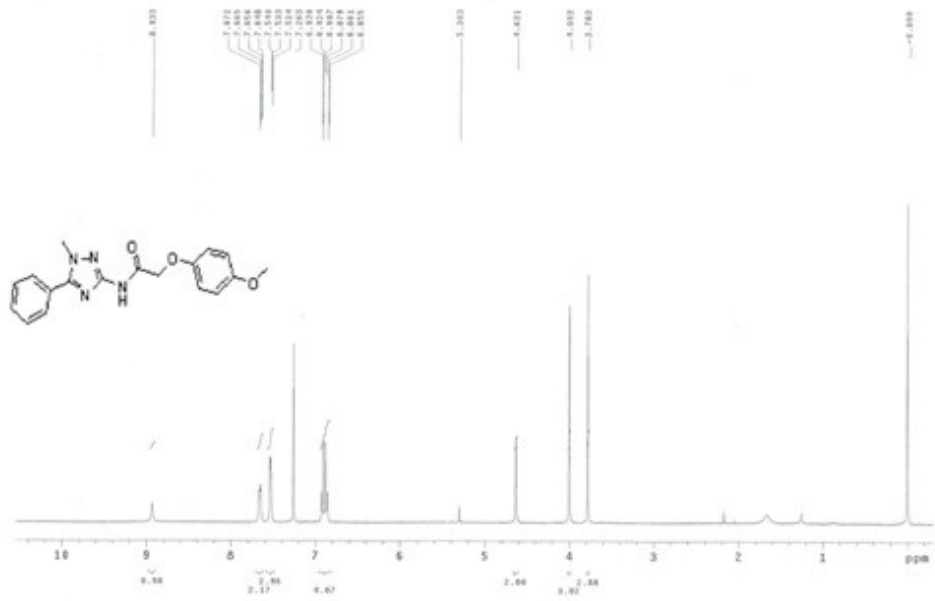

DVK10726 HI QCC13 2011-9-28  
 Pulse Sequence: zgpg1

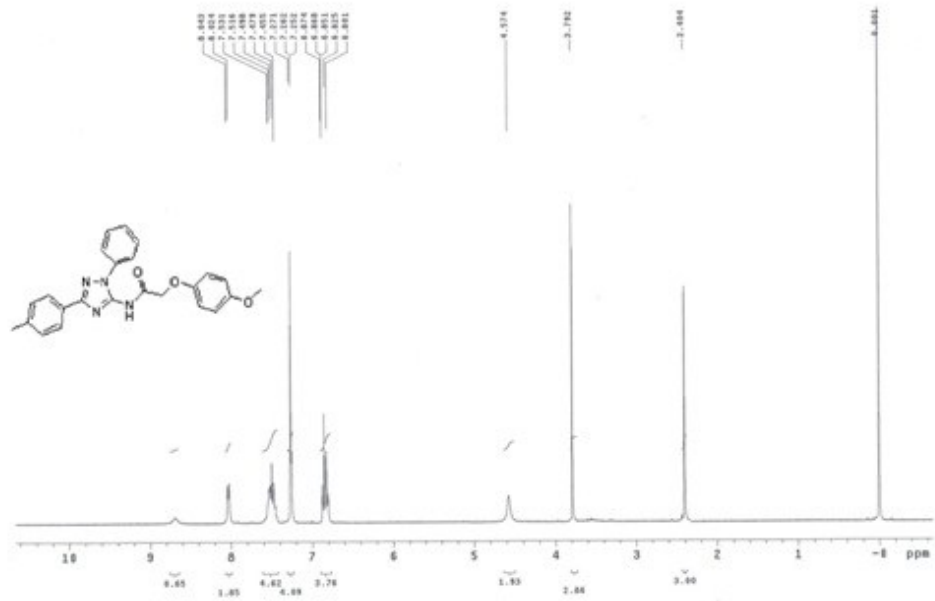

1711808 H1 QM13 2011-10-19  
Pulse Sequence: zgpg30

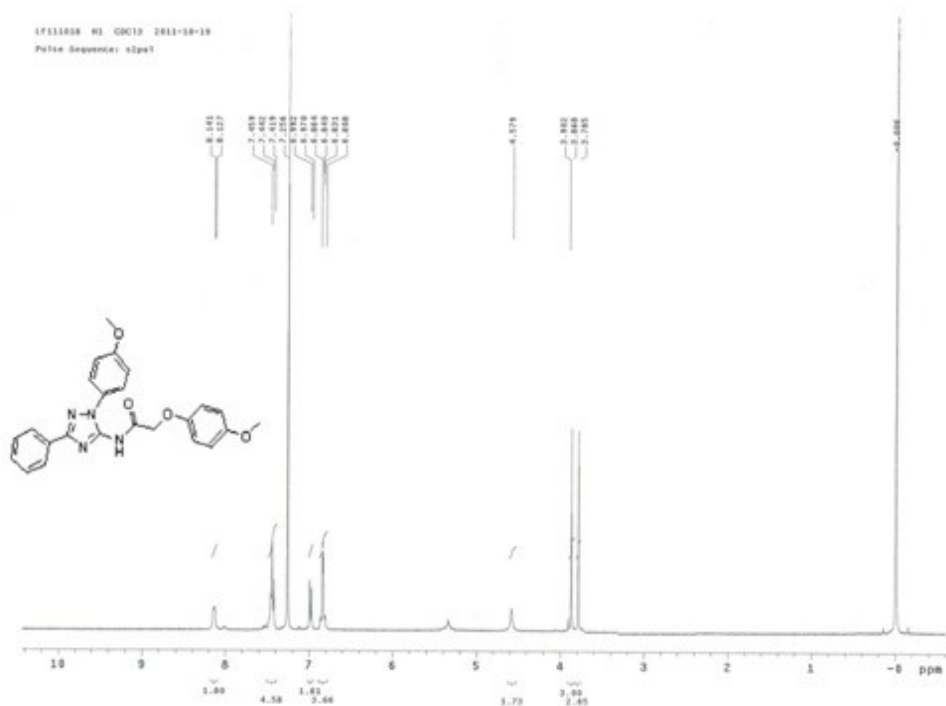

1711807 H1 QM13 2011-10-21  
Pulse Sequence: zgpg30

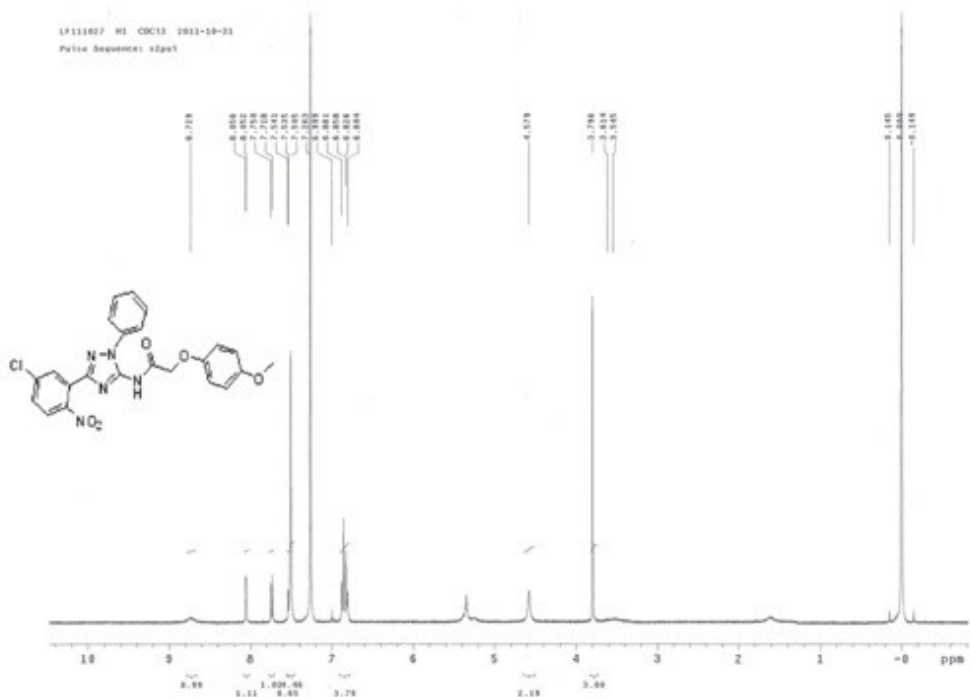

LF121156 HQ 08013 2892-11-20  
Pulse Sequence: zgpg30

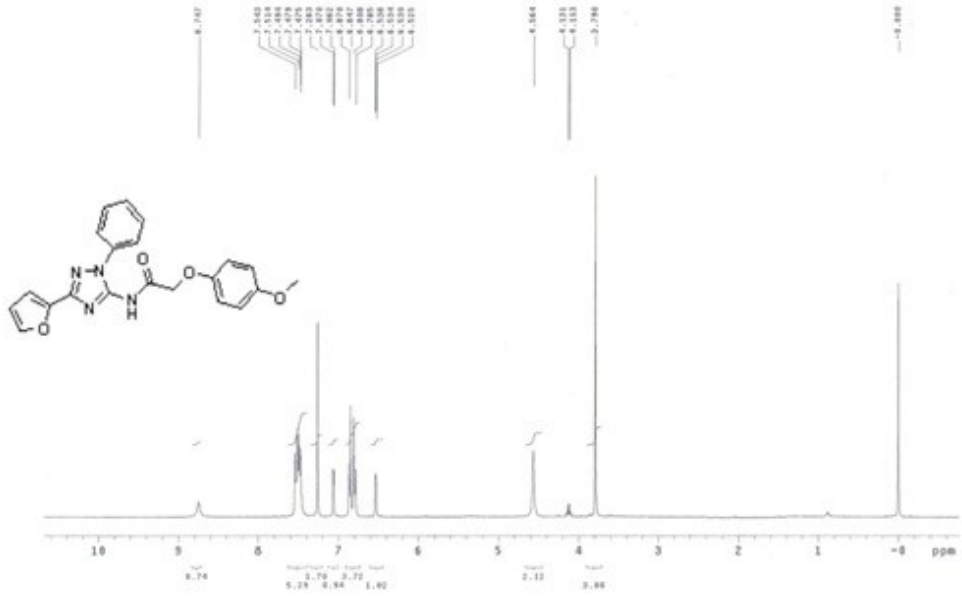

LF121325 HQ 08013 2892-11-22  
Pulse Sequence: zgpg30

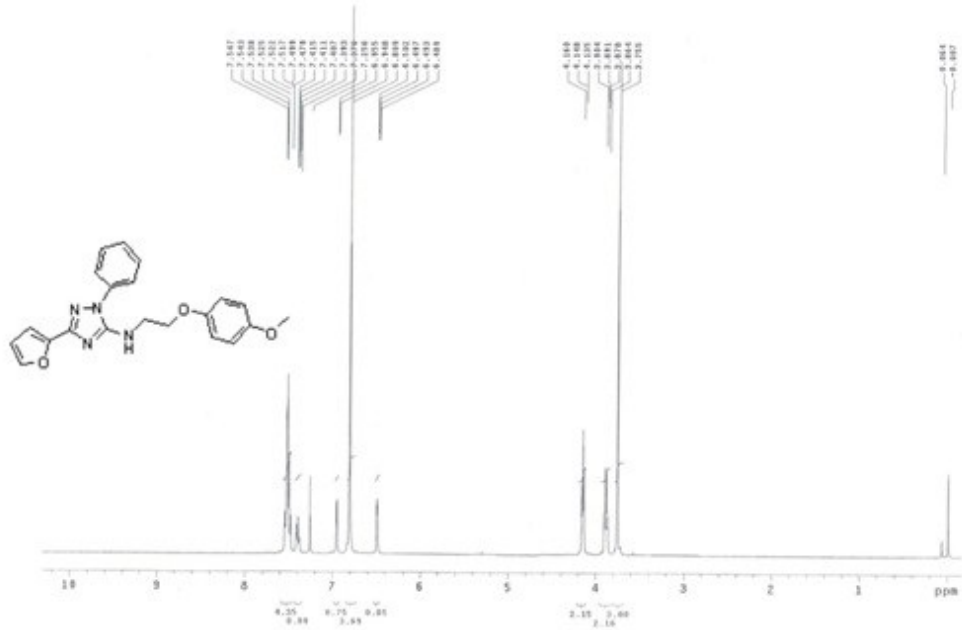

LF121347 M1 CDC13 2012-11-0  
Pulse Sequence: zgpg30

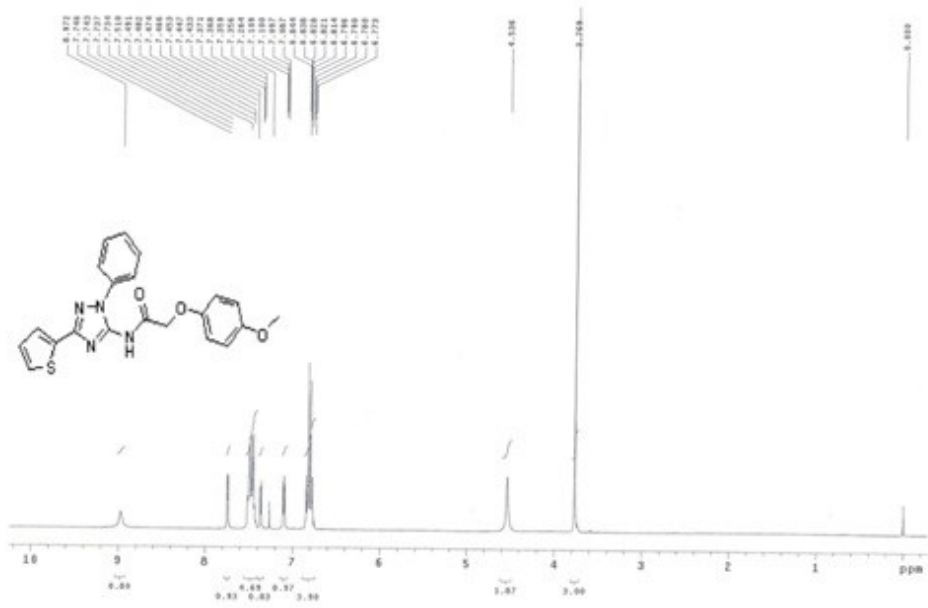

LF121348 M1 CDC13 2012-11-12  
Pulse Sequence: zgpg30

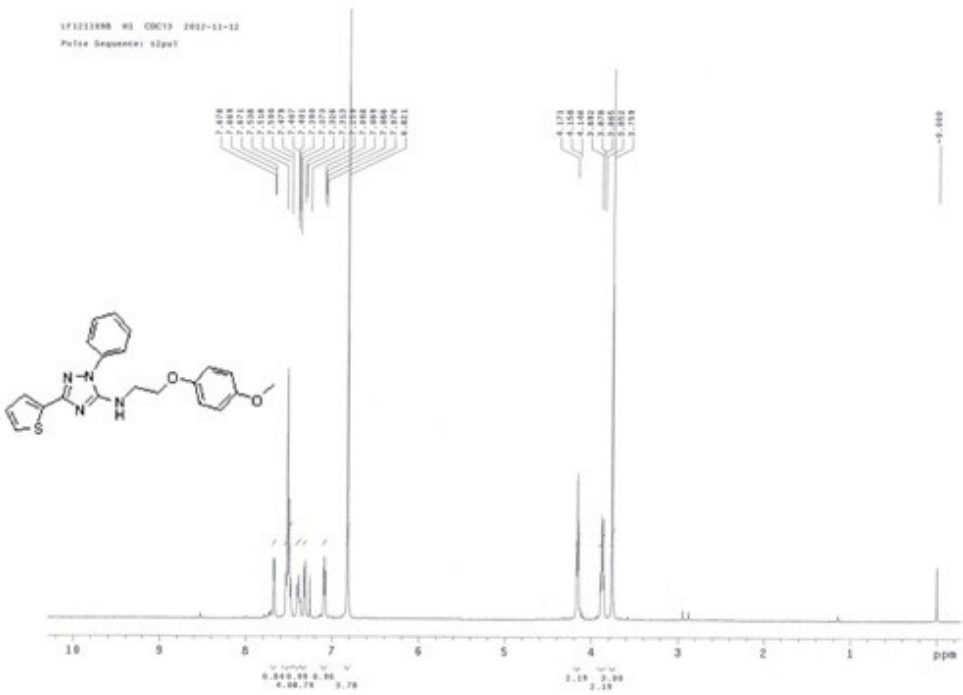

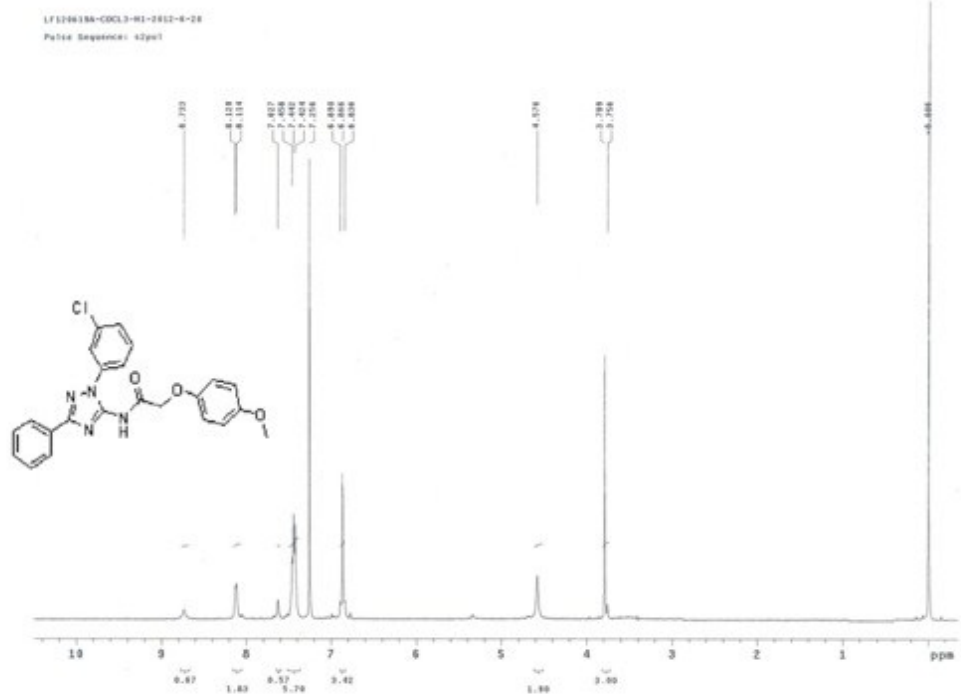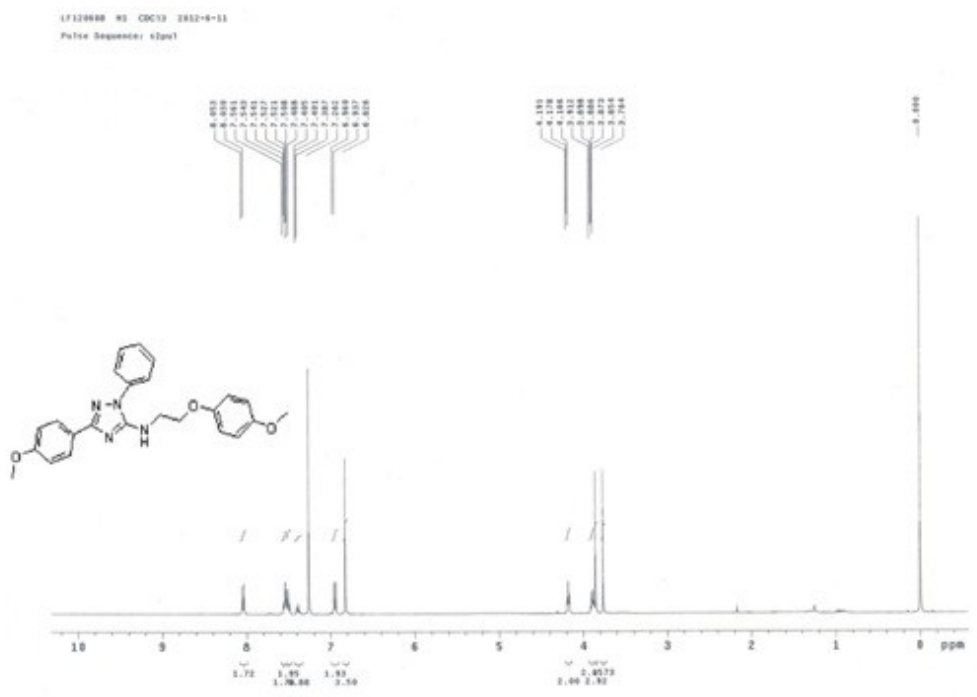

LF120413 M1 CDCl3 2012-4-17  
Pulse Sequence: zgpg30

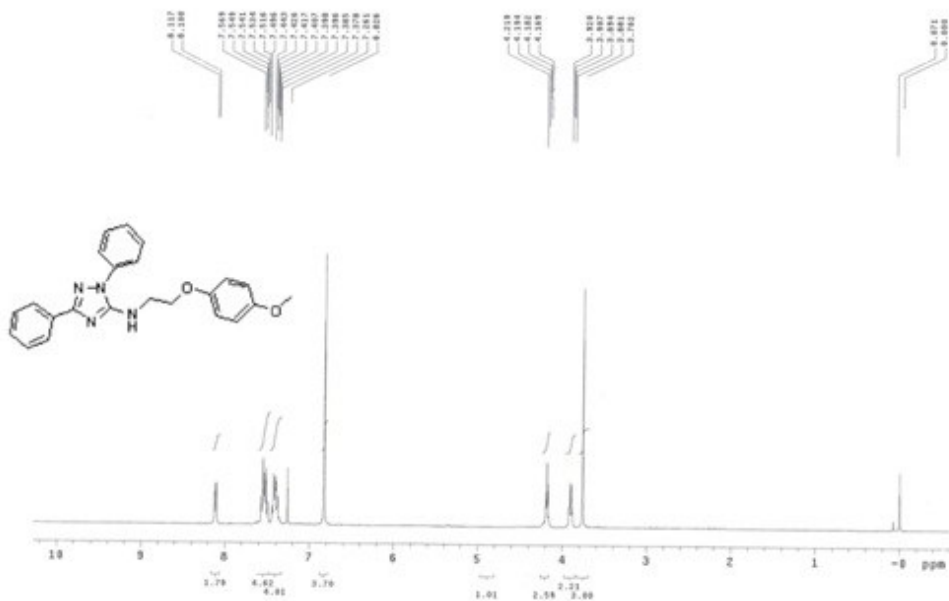

LF120514 M1 CDCl3 2012-5-16  
Pulse Sequence: zgpg30

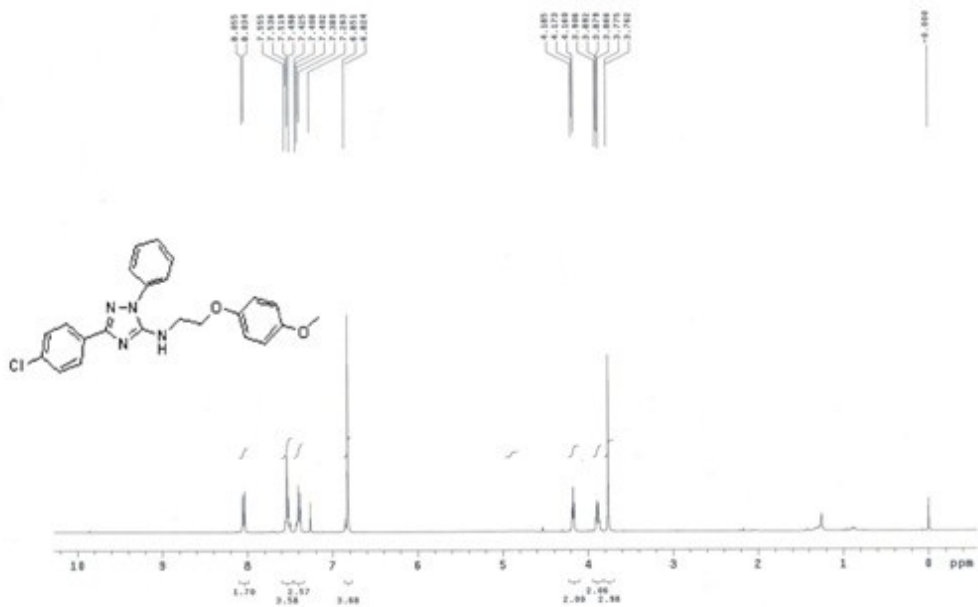

## HPLC Purity Data for Compounds

**Table 1. HPLC Purity Data for Compounds 1a-2i.**

| <b>Compound</b> | <b>Retention time<br/>(min)</b> | <b>Purity from integration<br/>(%)</b> |
|-----------------|---------------------------------|----------------------------------------|
| 1a              | 4.37 <sup>a</sup>               | 98.4                                   |
| 1b              | 4.38 <sup>a</sup>               | 96.7                                   |
| 1c              | 4.37 <sup>a</sup>               | 99.8                                   |
| 1d              | 3.87 <sup>a</sup>               | 95.3                                   |
| 1e              | 4.35 <sup>a</sup>               | 92.9                                   |
| 1f              | 4.25 <sup>a</sup>               | 99.3                                   |
| 1g              | 4.75 <sup>a</sup>               | 93.8                                   |
| 1h              | 4.74 <sup>a</sup>               | 98.3                                   |
| 1i              | 4.51 <sup>a</sup>               | 99.3                                   |
| 1j              | 4.35 <sup>a</sup>               | 99.6                                   |
| 1k              | 4.39 <sup>a</sup>               | 99.1                                   |
| 1l              | 4.19 <sup>a</sup>               | 98.0                                   |
| 1m              | 3.98 <sup>a</sup>               | 97.5                                   |
| 1n              | 4.66 <sup>a</sup>               | 95.6                                   |
| 1o              | 4.10 <sup>a</sup>               | 98.3                                   |
| 1p              | 5.74 <sup>a</sup>               | 97.2                                   |
| 2a              | 4.13 <sup>a</sup>               | 94.6                                   |
| 2b              | 4.73 <sup>a</sup>               | 98.8                                   |



|    |                   |      |
|----|-------------------|------|
| 2c | 4.52 <sup>a</sup> | 99.8 |
| 2d | 4.96 <sup>a</sup> | 98.0 |
| 2e | 4.54 <sup>a</sup> | 98.7 |
| 2f | 5.04 <sup>a</sup> | 97.0 |
| 2g | 4.42 <sup>a</sup> | 98.1 |
| 2h | 4.33 <sup>a</sup> | 97.3 |
| 2i | 4.08 <sup>a</sup> | 98.9 |

- a. The mobile phase was CH<sub>3</sub>OH, eluted isocratically at a flow rate of 0.5mL/min at room over 10 min, at room temperature and UV detection at 254 nm.

### HPLC traces of compound **1a**.

HPLC of 1a

| N° | t (min) | Compuesto | Area | C (%) | Area%  |
|----|---------|-----------|------|-------|--------|
| 1  | 1.264   | 20        | 0.00 | 0.00  | 0.1124 |
| 2  | 4.367   | 28998     | 0.00 | 98.35 |        |
| 3  | 6.869   | 31        | 0.00 | 0.173 |        |
| 4  | 10.550  | 402       | ref  | 1.267 |        |

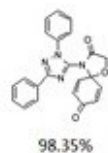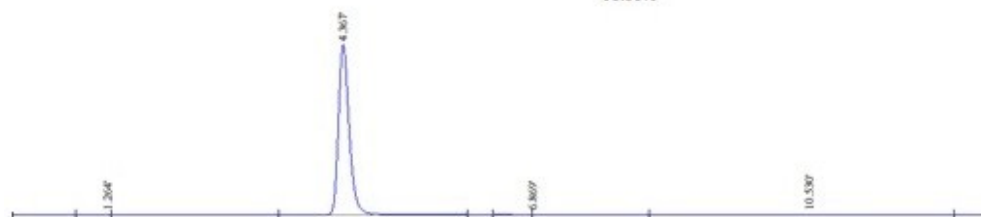

### HPLC traces of compound **1b**.

HPLC of 1b

| N° | t (min) | Compuesto | Area | C (%)   | Area% |
|----|---------|-----------|------|---------|-------|
| 1  | 1.550   | 21        | 0.00 | 0.07284 |       |
| 2  | 3.042   | 22        | 0.00 | 0.07664 |       |
| 3  | 4.380   | 27944     | 0.00 | 96.69   |       |
| 4  | 5.013   | 531       | 0.00 | 1.837   |       |
| 5  | 5.921   | 101       | 0.00 | 0.3479  |       |
| 6  | 8.422   | 281       | ref  | 0.9735  |       |

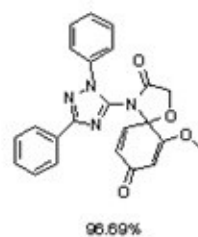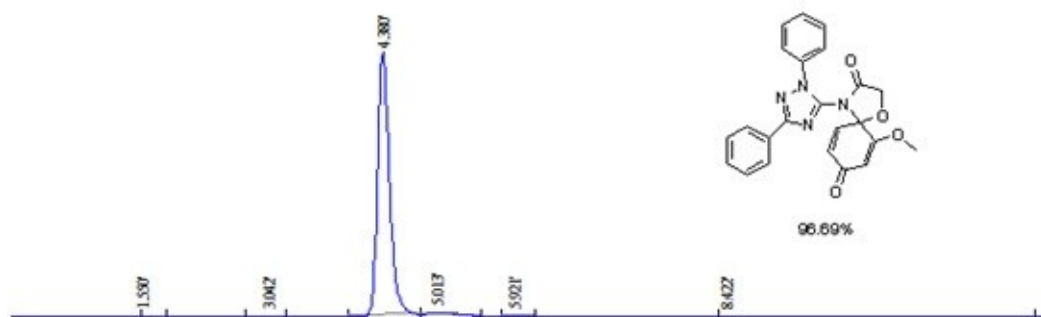

### HPLC traces of compound 1c.

HPLC of 1c

| N° | t(min) | Compuesto | Area  | C()  | Area% |
|----|--------|-----------|-------|------|-------|
| 1  | 2.868  |           | 85    | 0.00 | 0.163 |
| 2  | 4.367  |           | 51921 | ref  | 99.83 |

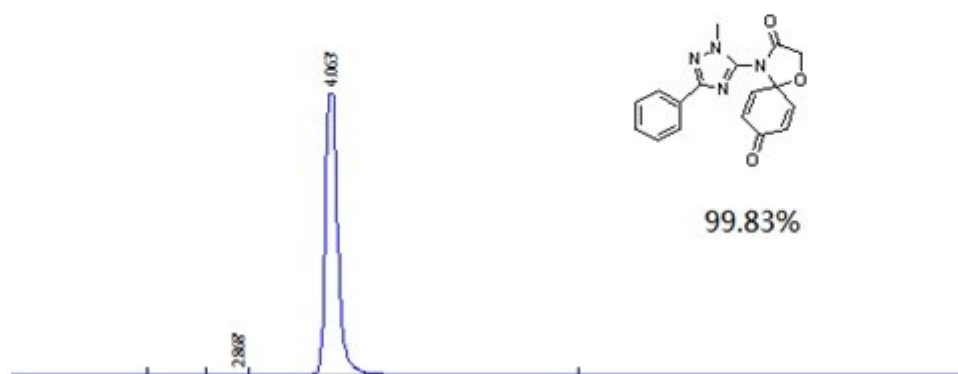

### HPLC traces of compound 1d.

HPLC of 1d

| N° | t(min) | Compuesto | Area  | C()  | Area%   |
|----|--------|-----------|-------|------|---------|
| 1  | 1.977  |           | 43    | 0.00 | 0.1212  |
| 2  | 2.202  |           | 13    | 0.00 | 0.03777 |
| 3  | 3.865  |           | 33510 | 0.00 | 95.34   |
| 4  | 4.384  |           | 332   | 0.00 | 0.9435  |
| 5  | 5.338  |           | 165   | 0.00 | 0.4703  |
| 6  | 6.268  |           | 52    | 0.00 | 0.1492  |
| 7  | 6.857  |           | 177   | 0.00 | 0.5041  |
| 8  | 7.871  |           | 163   | 0.00 | 0.463   |
| 9  | 9.290  |           | 694   | ref  | 1.973   |

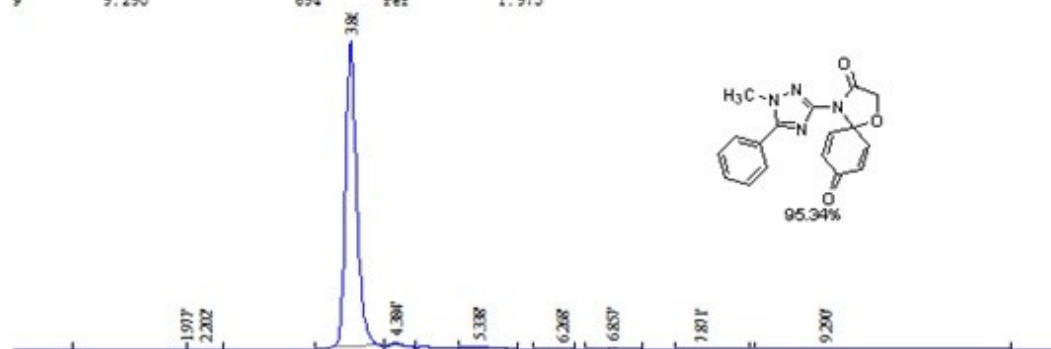

### HPLC traces of compound 1e.

| HPLC of 1e |         |           |      |       |       |
|------------|---------|-----------|------|-------|-------|
| N°         | t (min) | Compuesto | Area | C (%) | Area% |
| 1          | 0.723   |           | 22   | 0.00  | 0.301 |
| 2          | 3.661   |           | 74   | 0.00  | 1.008 |
| 3          | 4.348   |           | 6816 | 0.00  | 92.93 |
| 4          | 5.237   |           | 132  | 0.00  | 1.794 |
| 5          | 6.999   |           | 82   | 0.00  | 1.121 |
| 6          | 8.049   |           | 80   | 0.00  | 1.092 |
| 7          | 10.914  |           | 128  | ref   | 1.749 |

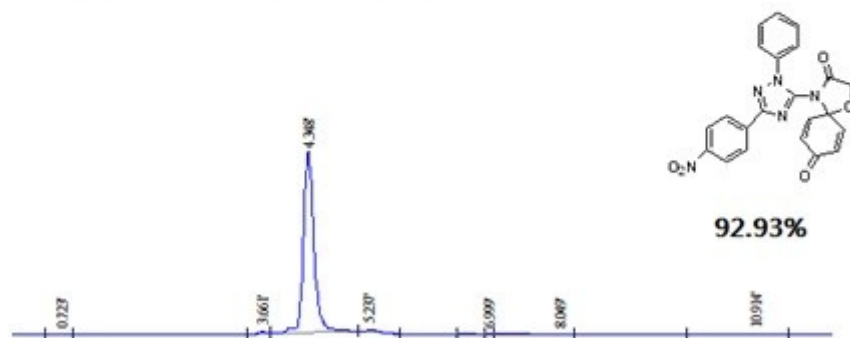

### HPLC traces of compound 1f.

| HPLC of 1f |         |           |       |       |        |
|------------|---------|-----------|-------|-------|--------|
| N°         | t (min) | Compuesto | Area  | C (%) | Area%  |
| 1          | 4.249   |           | 19632 | 0.00  | 99.26  |
| 2          | 6.423   |           | 66    | 0.00  | 0.3339 |
| 3          | 8.424   |           | 30    | 0.00  | 0.1522 |
| 4          | 8.520   |           | 51    | ref   | 0.2603 |

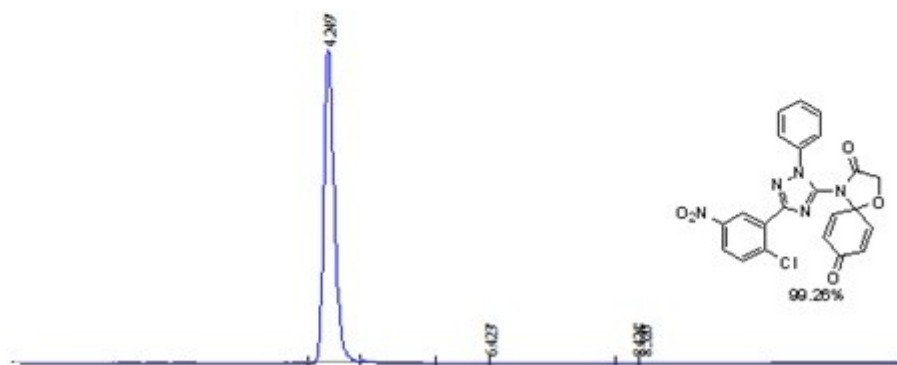

### HPLC traces of compound 1g.

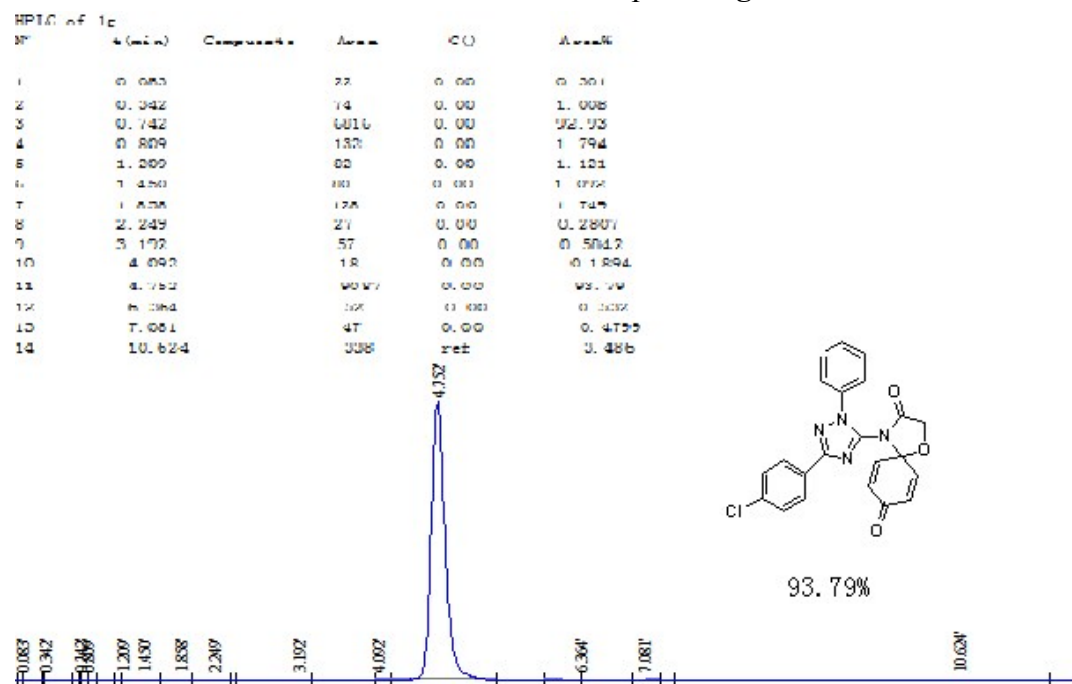

### HPLC traces of compound 1h.

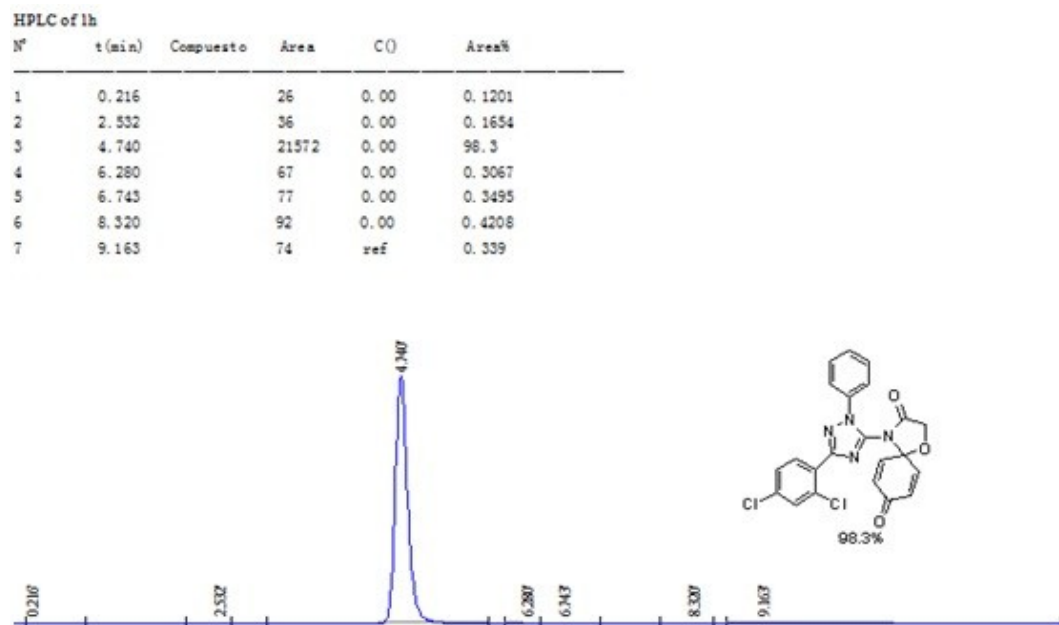

### HPLC traces of compound **1i**.

HPLC of 1i

| N° | t(min) | Compuesto | Area  | CO   | Area%   |
|----|--------|-----------|-------|------|---------|
| 1  | 4.508  |           | 32998 | 0.00 | 99.32   |
| 2  | 5.109  |           | 21    | 0.00 | 0.06253 |
| 3  | 5.158  |           | 26    | 0.00 | 0.07697 |
| 4  | 5.968  |           | 180   | ref  | 0.5428  |

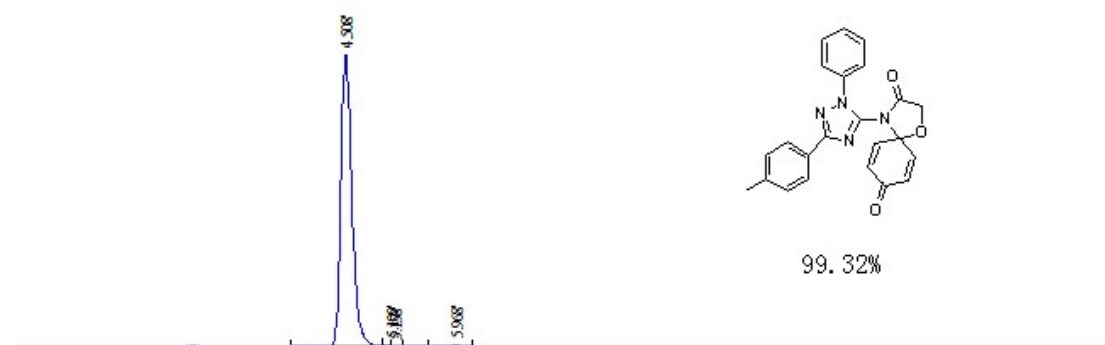

### HPLC traces of compound **1j**.

HPLC of 1j

| N° | t(min) | Compuesto | Area  | CO   | Area%   |
|----|--------|-----------|-------|------|---------|
| 1  | 0.870  |           | 38    | 0.00 | 0.07662 |
| 2  | 3.876  |           | 152   | 0.00 | 0.3058  |
| 3  | 4.351  |           | 49663 | ref  | 99.62   |

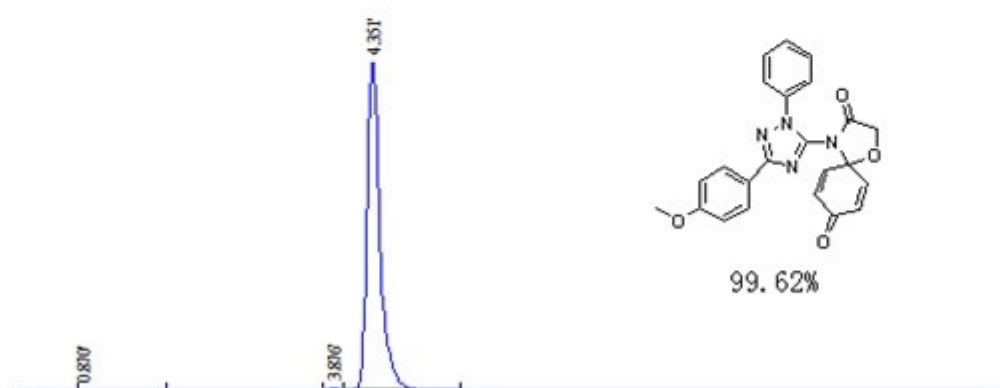

### HPLC traces of compound **1k**.

HPLC of 1k

| N° | t(min) | Compuesto | Area  | C()  | Area%  |
|----|--------|-----------|-------|------|--------|
| 1  | 1.193  |           | 46    | 0.00 | 0.1627 |
| 2  | 3.667  |           | 141   | 0.00 | 0.4992 |
| 3  | 4.393  |           | 28004 | 0.00 | 99.06  |
| 4  | 6.778  |           | 78    | ref  | 0.2758 |

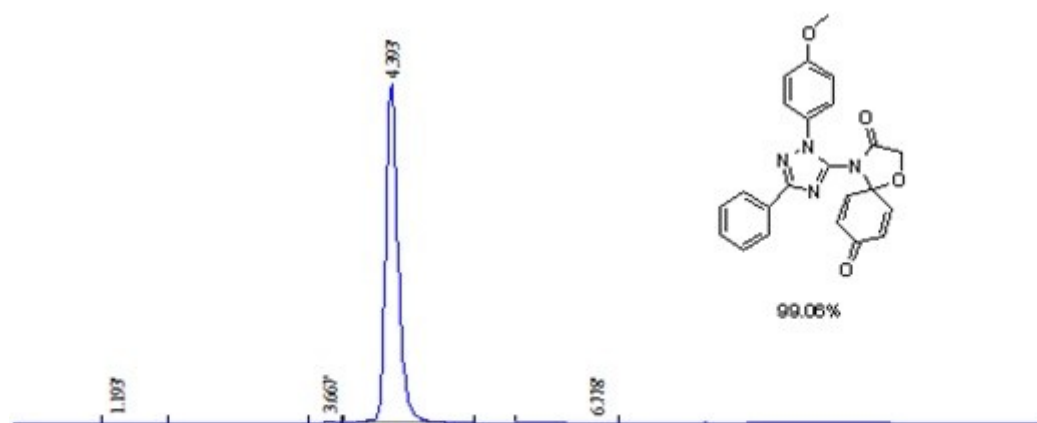

### HPLC traces of compound **1l**.

HPLC of 1l

| N° | t(min) | Compuesto | Area  | C()  | Area%  |
|----|--------|-----------|-------|------|--------|
| 1  | 3.642  |           | 50    | 0.00 | 0.1872 |
| 2  | 4.188  |           | 26032 | 0.00 | 98.03  |
| 3  | 4.713  |           | 311   | 0.00 | 1.172  |
| 4  | 6.976  |           | 162   | ref  | 0.6091 |

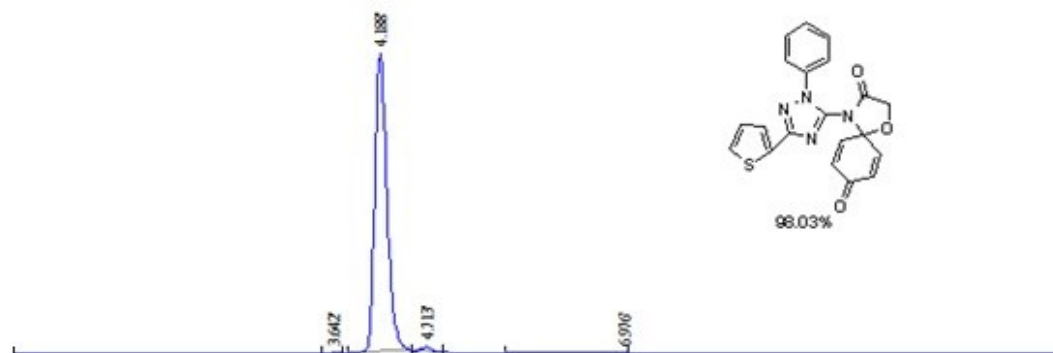

### HPLC traces of compound **1m**.

HPLC of 1m

| N° | t (min) | Compuesto | Area  | C () | Area%  |
|----|---------|-----------|-------|------|--------|
| 1  | 0.096   |           | 53    | 0.00 | 0.4092 |
| 2  | 1.969   |           | 35    | 0.00 | 0.2683 |
| 3  | 2.233   |           | 35    | 0.00 | 0.2725 |
| 4  | 3.977   |           | 12559 | 0.00 | 97.52  |
| 5  | 4.939   |           | 69    | 0.00 | 0.5394 |
| 6  | 7.461   |           | 128   | ref  | 0.993  |

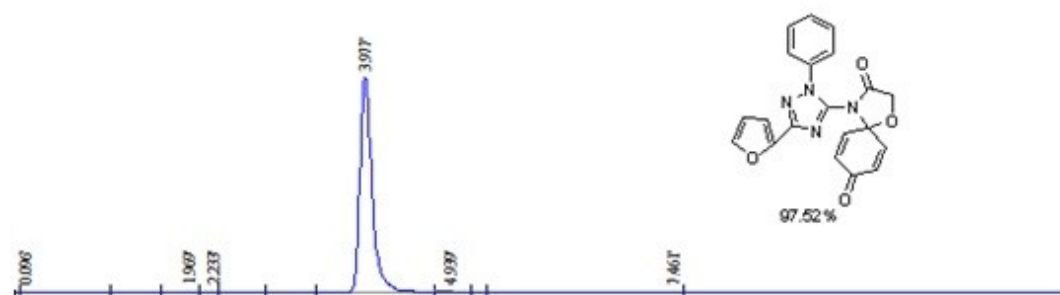

### HPLC traces of compound **1n**.

HPLC of 1n

| N° | t (min) | Compuesto | Area  | C () | Area%  |
|----|---------|-----------|-------|------|--------|
| 1  | 1.535   |           | 121   | 0.00 | 0.4943 |
| 2  | 4.657   |           | 23490 | 0.00 | 95.64  |
| 3  | 5.694   |           | 78    | 0.00 | 0.3166 |
| 4  | 6.219   |           | 166   | 0.00 | 0.6777 |
| 5  | 7.448   |           | 99    | 0.00 | 0.4018 |
| 6  | 9.734   |           | 607   | ref  | 2.469  |

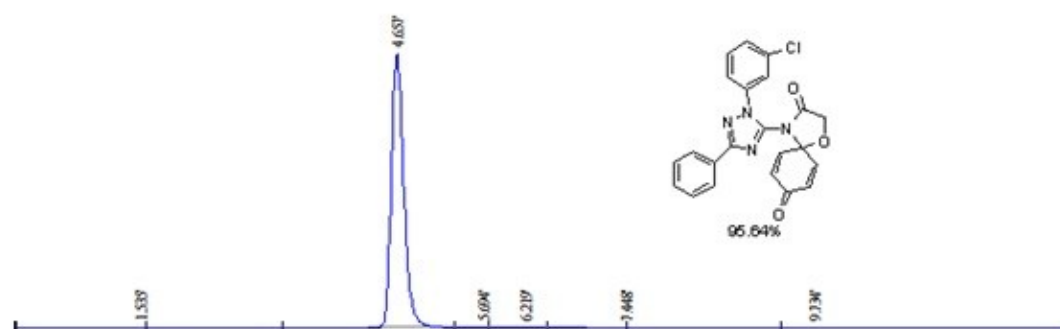



### HPLC traces of compound 1o.

HPLC of 1o

| N° | t (min) | Compuesto | Area  | C()  | Area%   |
|----|---------|-----------|-------|------|---------|
| 1  | 0.389   |           | 14    | 0.00 | 0.09174 |
| 2  | 0.911   |           | 39    | 0.00 | 0.2619  |
| 3  | 4.104   |           | 14578 | 0.00 | 98.34   |
| 4  | 5.440   |           | 44    | 0.00 | 0.2953  |
| 5  | 7.571   |           | 44    | 0.00 | 0.2995  |
| 6  | 8.602   |           | 106   | ref  | 0.714   |

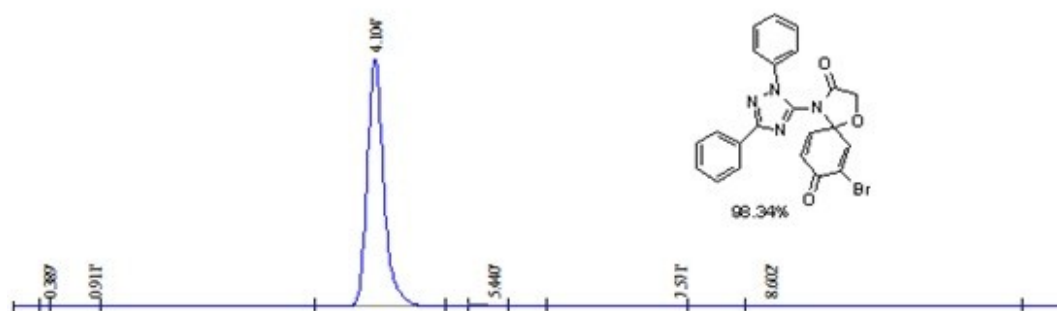

### HPLC traces of compound 1P.

HPLC of 1P

| N° | t (min) | Compuesto | Area | C()  | Area%  |
|----|---------|-----------|------|------|--------|
| 1  | 2.605   |           | 30   | 0.00 | 1.409  |
| 2  | 4.381   |           | 24   | 0.00 | 0.9809 |
| 3  | 5.744   |           | 4546 | 0.00 | 97.25  |
| 4  | 9.193   |           | 8    | ref  | 0.3579 |

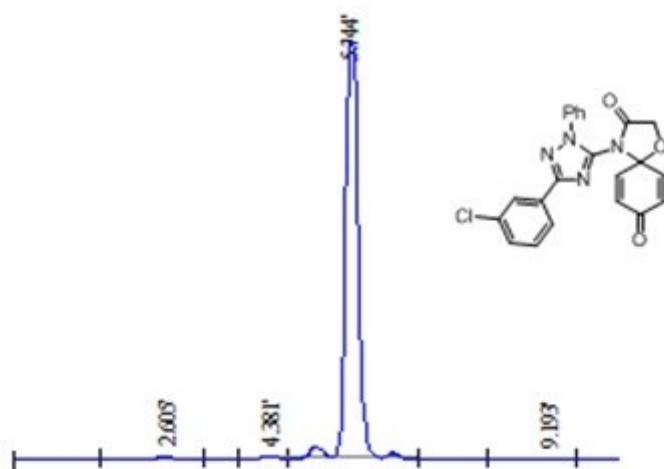

### HPLC traces of compound 2a.

| Nº | t (min) | Compuesto | Area  | C (%) | %Area  |
|----|---------|-----------|-------|-------|--------|
| 1  | 0.887   |           | 214   | 0.00  | 0.7124 |
| 2  | 2.335   |           | 128   | 0.00  | 0.7582 |
| 3  | 4.132   |           | 28445 | 0.00  | 94.65  |
| 4  | 6.122   |           | 776   | 0.00  | 2.582  |
| 5  | 7.778   |           | 137   | 0.00  | 0.4543 |
| 6  | 9.058   |           | 193   | 0.00  | 0.6407 |
| 7  | 9.787   |           | 62    | ref   | 0.2073 |

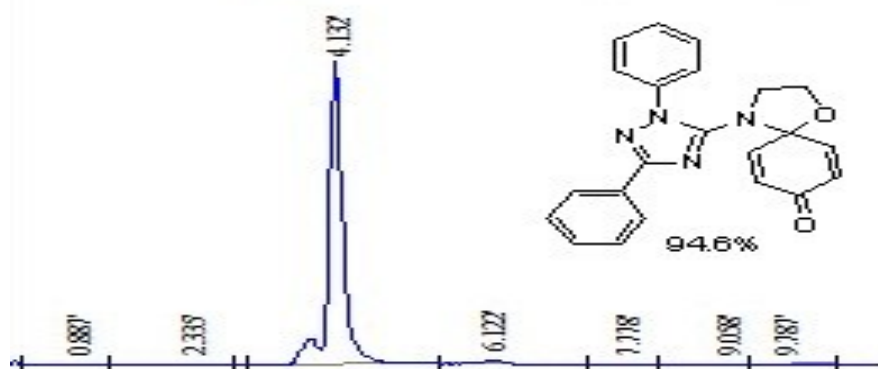

### HPLC traces of compound 2b.

HPLC of 2b

| Nº | t (min) | Compuesto | Area  | C (%) | Area%   |
|----|---------|-----------|-------|-------|---------|
| 1  | 3.972   |           | 73    | 0.00  | 0.332   |
| 2  | 4.728   |           | 31137 | 0.00  | 98.78   |
| 3  | 6.819   |           | 39    | 0.00  | 0.1229  |
| 4  | 7.880   |           | 40    | 0.00  | 0.1261  |
| 5  | 8.169   |           | 22    | 0.00  | 0.07122 |
| 6  | 9.443   |           | 81    | ref   | 0.257   |

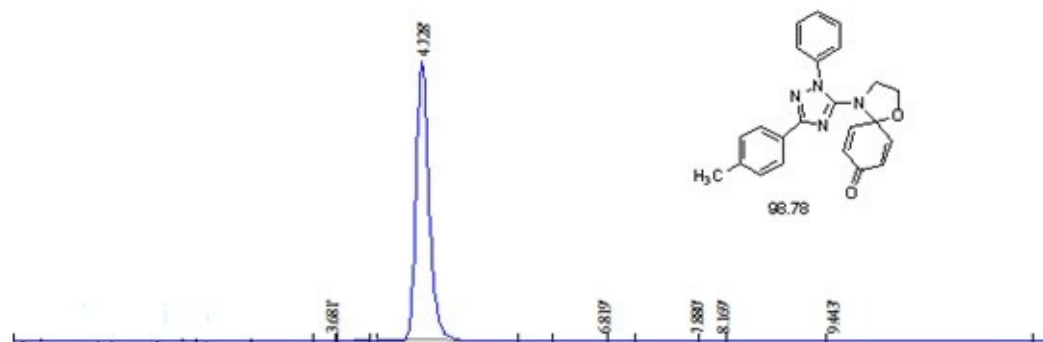

### HPLC traces of compound 2c.

HPLC of 2c

| N° | t(min) | Compuesto | Area  | CO   | Area%  |
|----|--------|-----------|-------|------|--------|
| 1  | 4.520  |           | 16365 | 0.00 | 99.84  |
| 2  | 4.367  | 25        |       | ref  | 0.1525 |

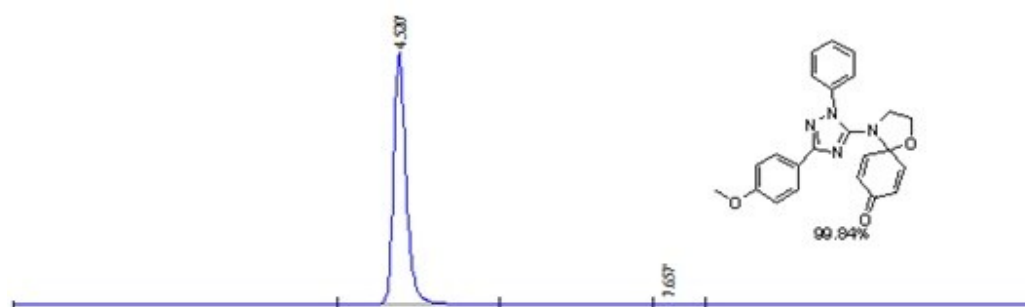

### HPLC traces of compound 2d.

HPLC of 2d

| N° | t(min) | Compuesto | Area  | CO   | Area%  |
|----|--------|-----------|-------|------|--------|
| 1  | 0.413  |           | 63    | 0.00 | 0.1885 |
| 2  | 4.521  |           | 613   | 0.00 | 1.84   |
| 3  | 4.961  |           | 32638 | ref  | 97.97  |

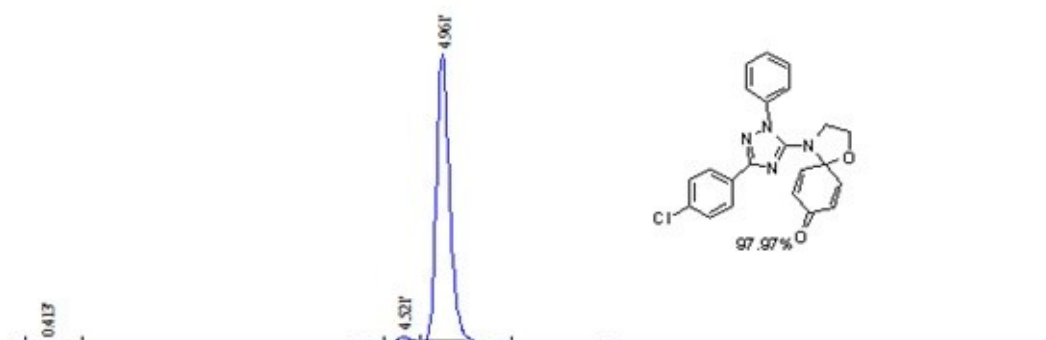

### HPLC traces of compound 2e.

| N° | t (min) | Compuesto | Area  | C () | %Area  |
|----|---------|-----------|-------|------|--------|
| 1  | 0.764   |           | 398   | 0.00 | 0.8204 |
| 2  | 4.543   |           | 47903 | 0.00 | 98.77  |
| 3  | 6.823   |           | 135   | 0.00 | 0.2776 |
| 4  | 8.279   |           | 67    | ref  | 0.1386 |

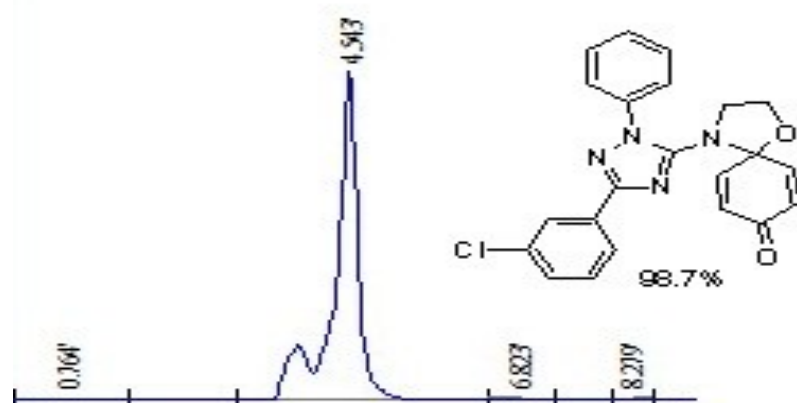

### HPLC traces of compound 2f.

HPLC of 2f

| N° | t (min) | Compuesto | Area  | C () | Area%  |
|----|---------|-----------|-------|------|--------|
| 1  | 3.970   |           | 92    | 0.00 | 0.3767 |
| 2  | 4.518   |           | 587   | 0.00 | 2.396  |
| 3  | 5.042   |           | 23756 | 0.00 | 96.95  |
| 4  | 7.371   |           | 33    | 0.00 | 0.1343 |
| 5  | 7.707   |           | 35    | ref  | 0.1416 |

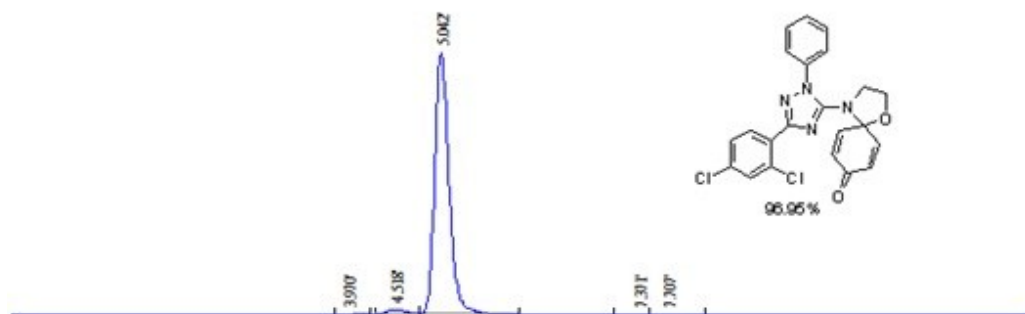

HPLC traces of compound **2g**.

| N° | t (min) | Compuesto | Area  | C () | %Area |
|----|---------|-----------|-------|------|-------|
| 1  | 4.417   |           | 60630 | 0.00 | 98.17 |
| 2  | 6.920   |           | 1135  | ref  | 1.837 |

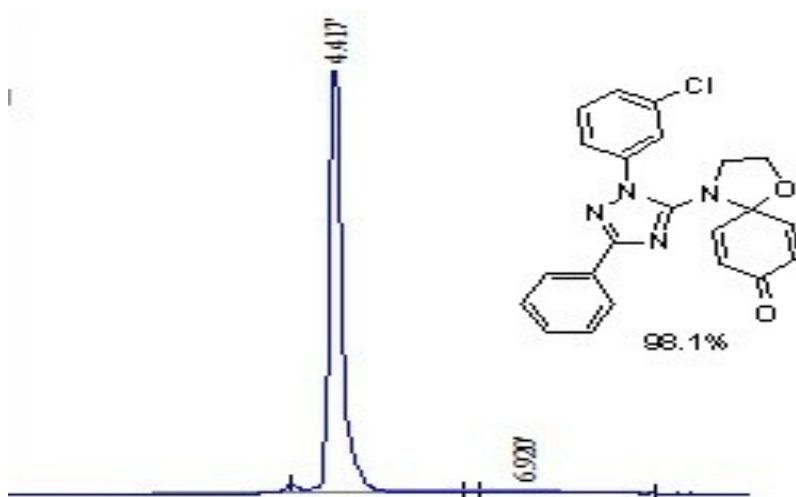

HPLC traces of compound **2h**.

HPLC of 2h

| N° | t (min) | Compuesto | Area  | C () | Area%  |
|----|---------|-----------|-------|------|--------|
| 1  | 0.729   |           | 122   | 0.00 | 0.2255 |
| 2  | 1.318   |           | 145   | 0.00 | 0.2683 |
| 3  | 2.203   |           | 110   | 0.00 | 0.2042 |
| 4  | 4.330   |           | 52460 | 0.00 | 97.27  |
| 5  | 6.196   |           | 675   | 0.00 | 1.252  |
| 6  | 9.750   |           | 424   | ref  | 0.7856 |

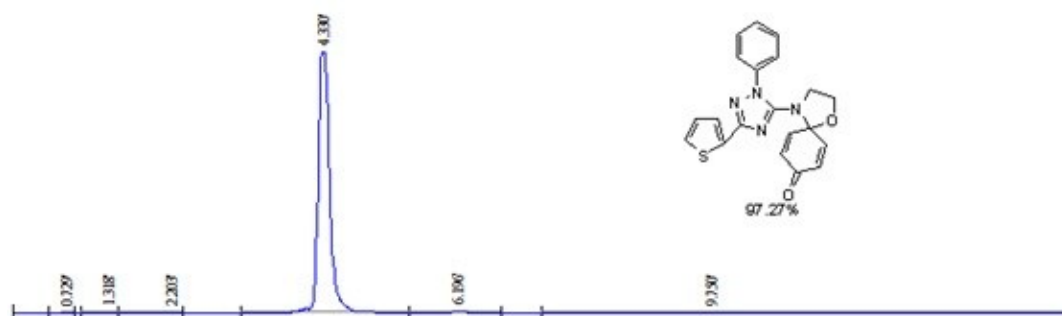

## HPLC traces of compound **2i**.

HPLC of 2i

| N° | t (min) | Compuesto | Area  | CO   | Area%  |
|----|---------|-----------|-------|------|--------|
| 1  | 0.357   |           | 18    | 0.00 | 0.172  |
| 2  | 1.829   |           | 20    | 0.00 | 0.1891 |
| 3  | 4.079   |           | 10364 | 0.00 | 98.94  |
| 4  | 4.693   |           | 21    | 0.00 | 0.2029 |
| 5  | 5.434   |           | 39    | 0.00 | 0.3742 |

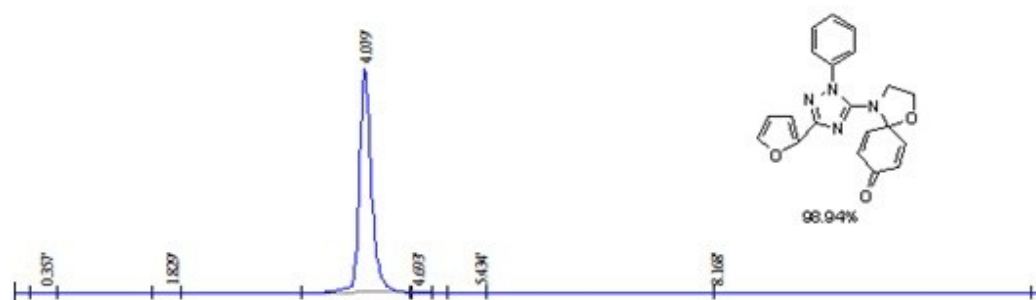

Supplement: NIHMS963735-supplement-Supplement_1.pdf [file NIHMS963735-supplement-Supplement_1.pdf]
